# Supplementary material for: Syntheses and structures of half-sandwich iridium(iii) and rhodium(iii) complexes with organochalcogen (S, Se) ligands bearing N-methylimidazole and their use as catalysts for norbornene polymerization
Source: Royal Society of Chemistry journal article supplement (doi:10.1039/b801862f), 2008-01-01

mhit.12  
jwg/mhit

<sup>1</sup>H NMR in CDCl<sub>3</sub>

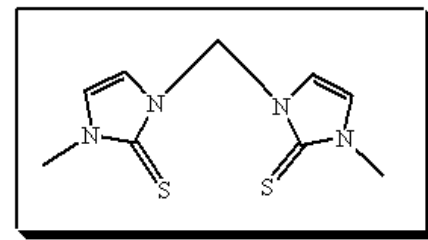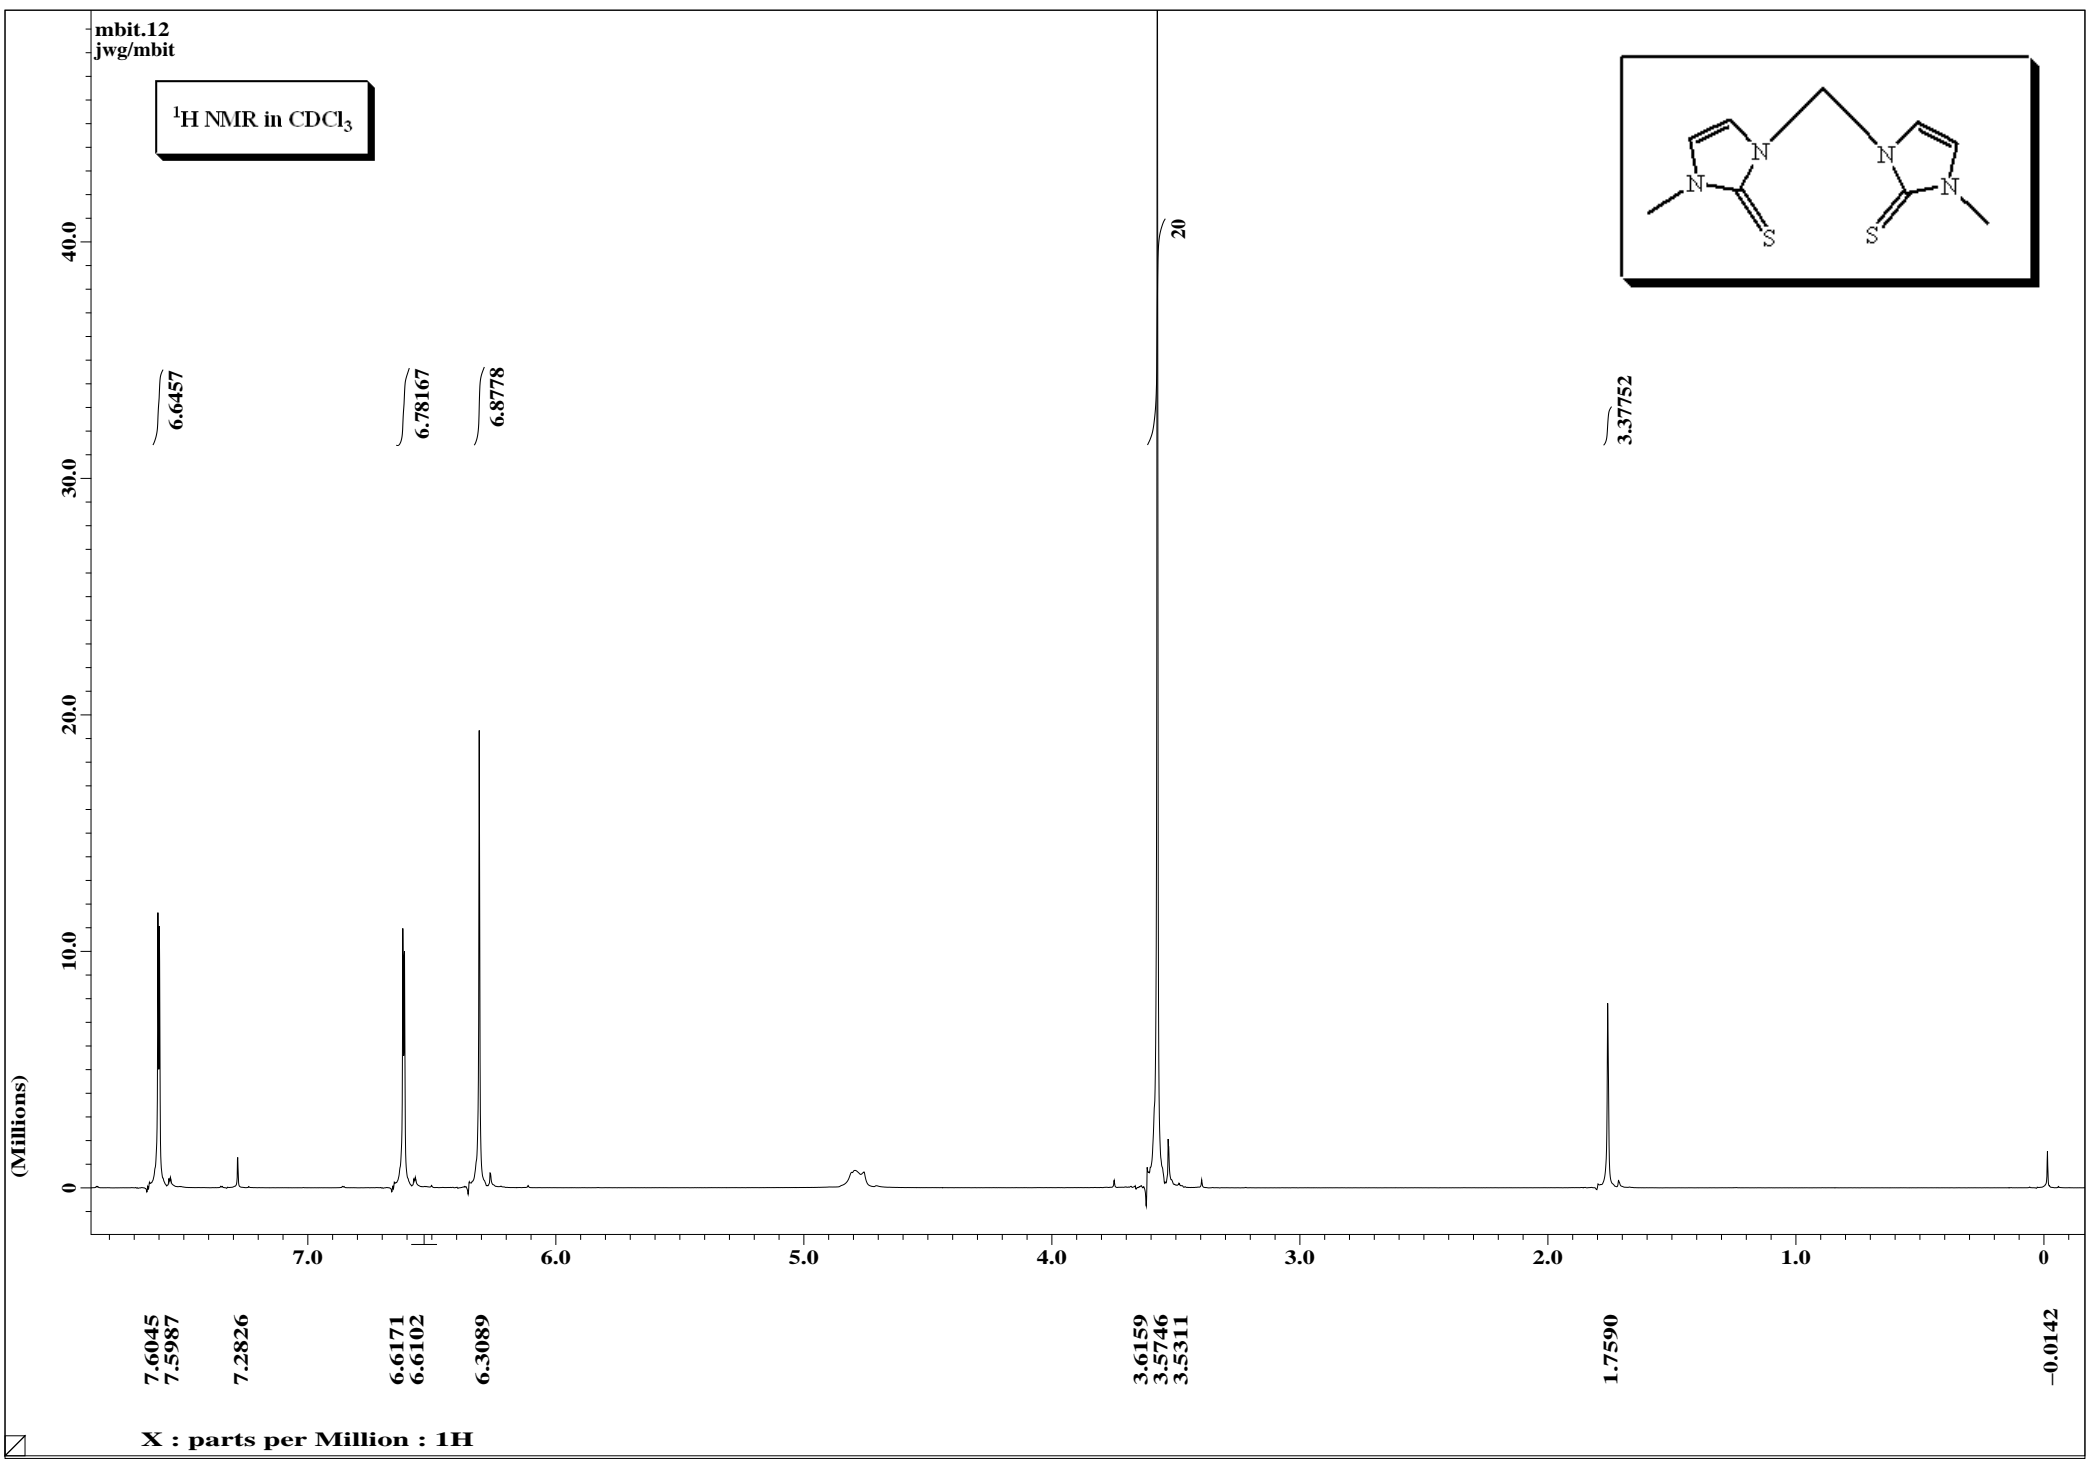

7.6045  
7.5987

7.2826

6.6171  
6.6102

6.3089

3.6159  
3.5746  
3.5311

1.7590

-0.0142

X : parts per Million : 1H

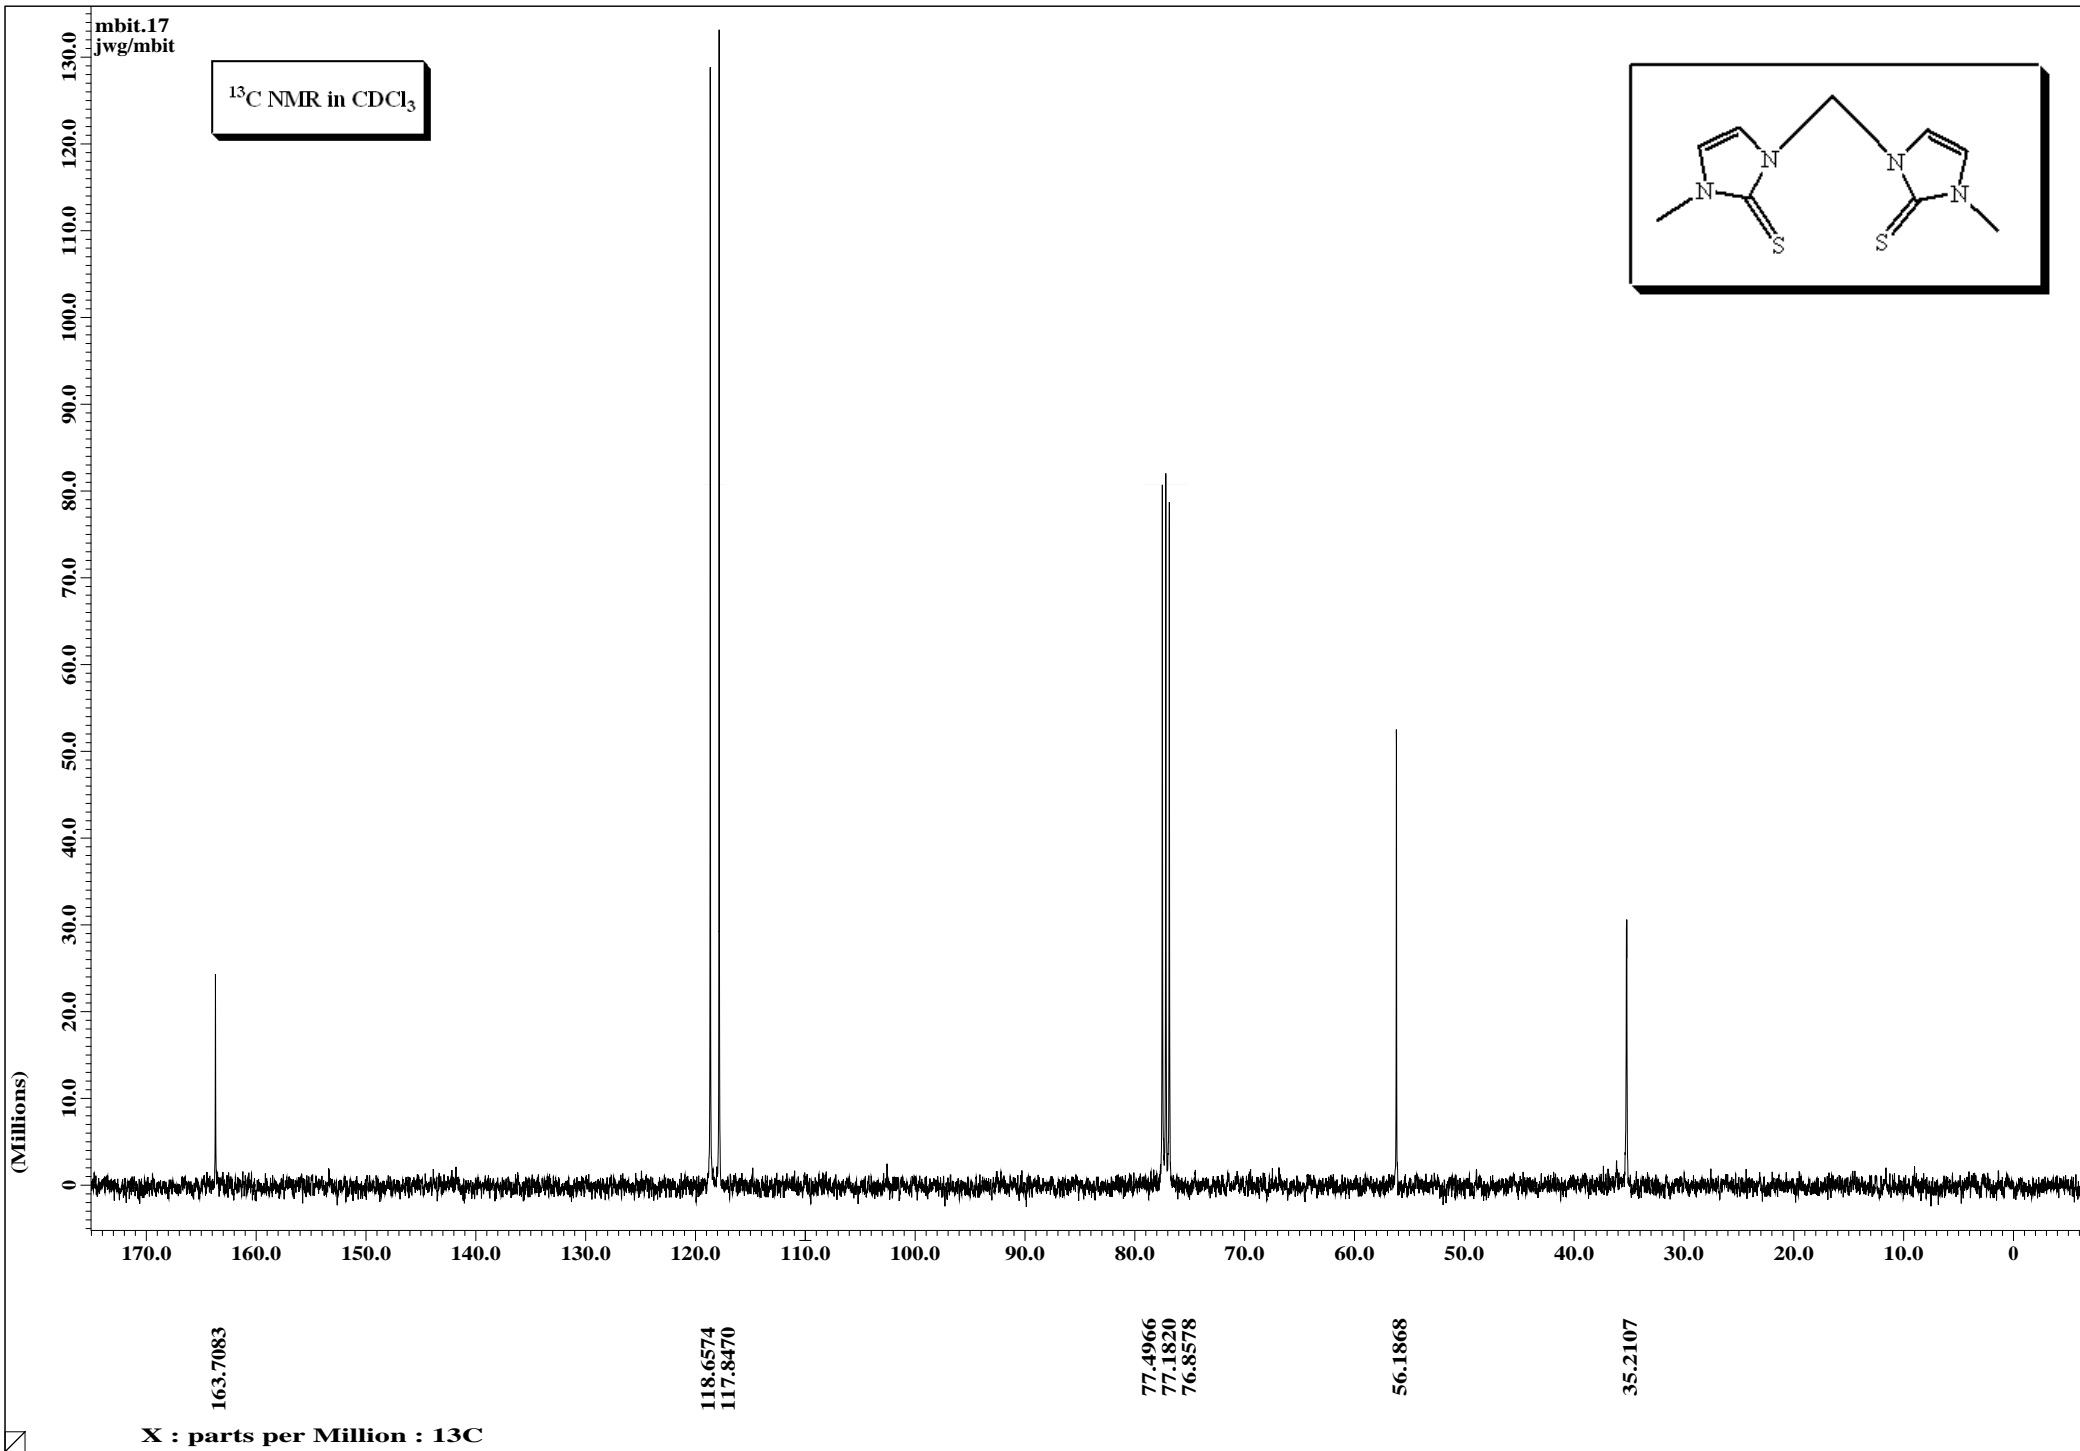

mbis.7  
jwg/mbis

<sup>1</sup>H NMR in CDCl<sub>3</sub>

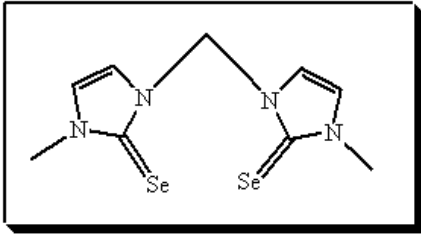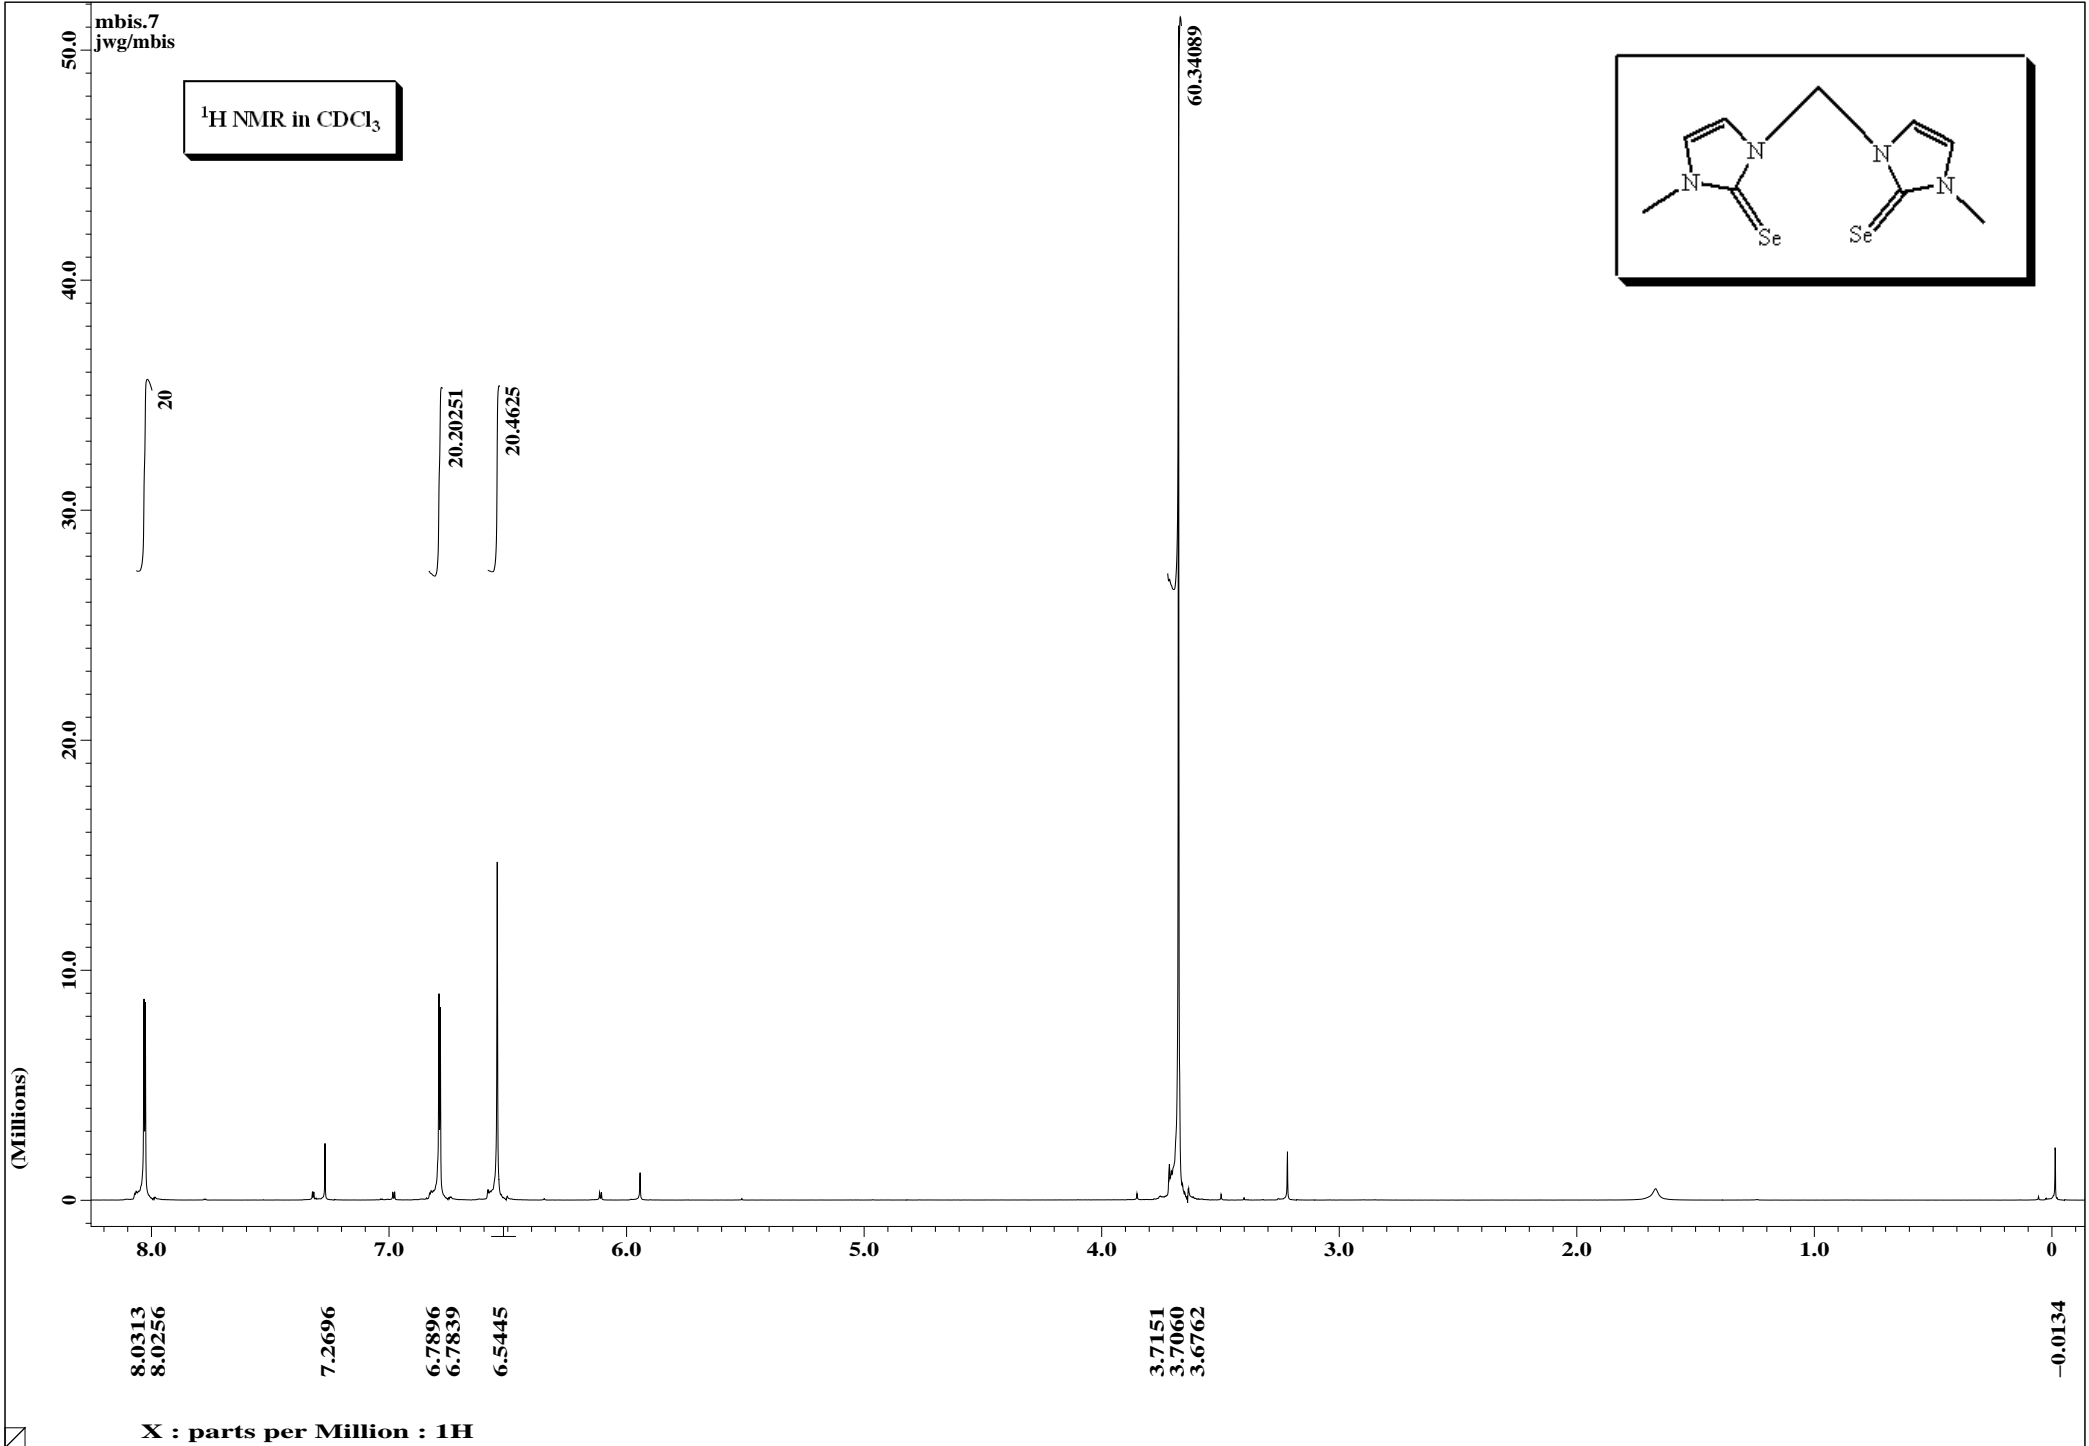

mbis.12  
jwg/mbis

$^{13}\text{C}$  NMR in  $\text{CDCl}_3$

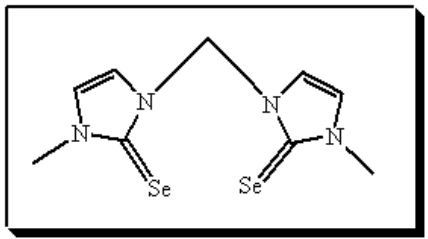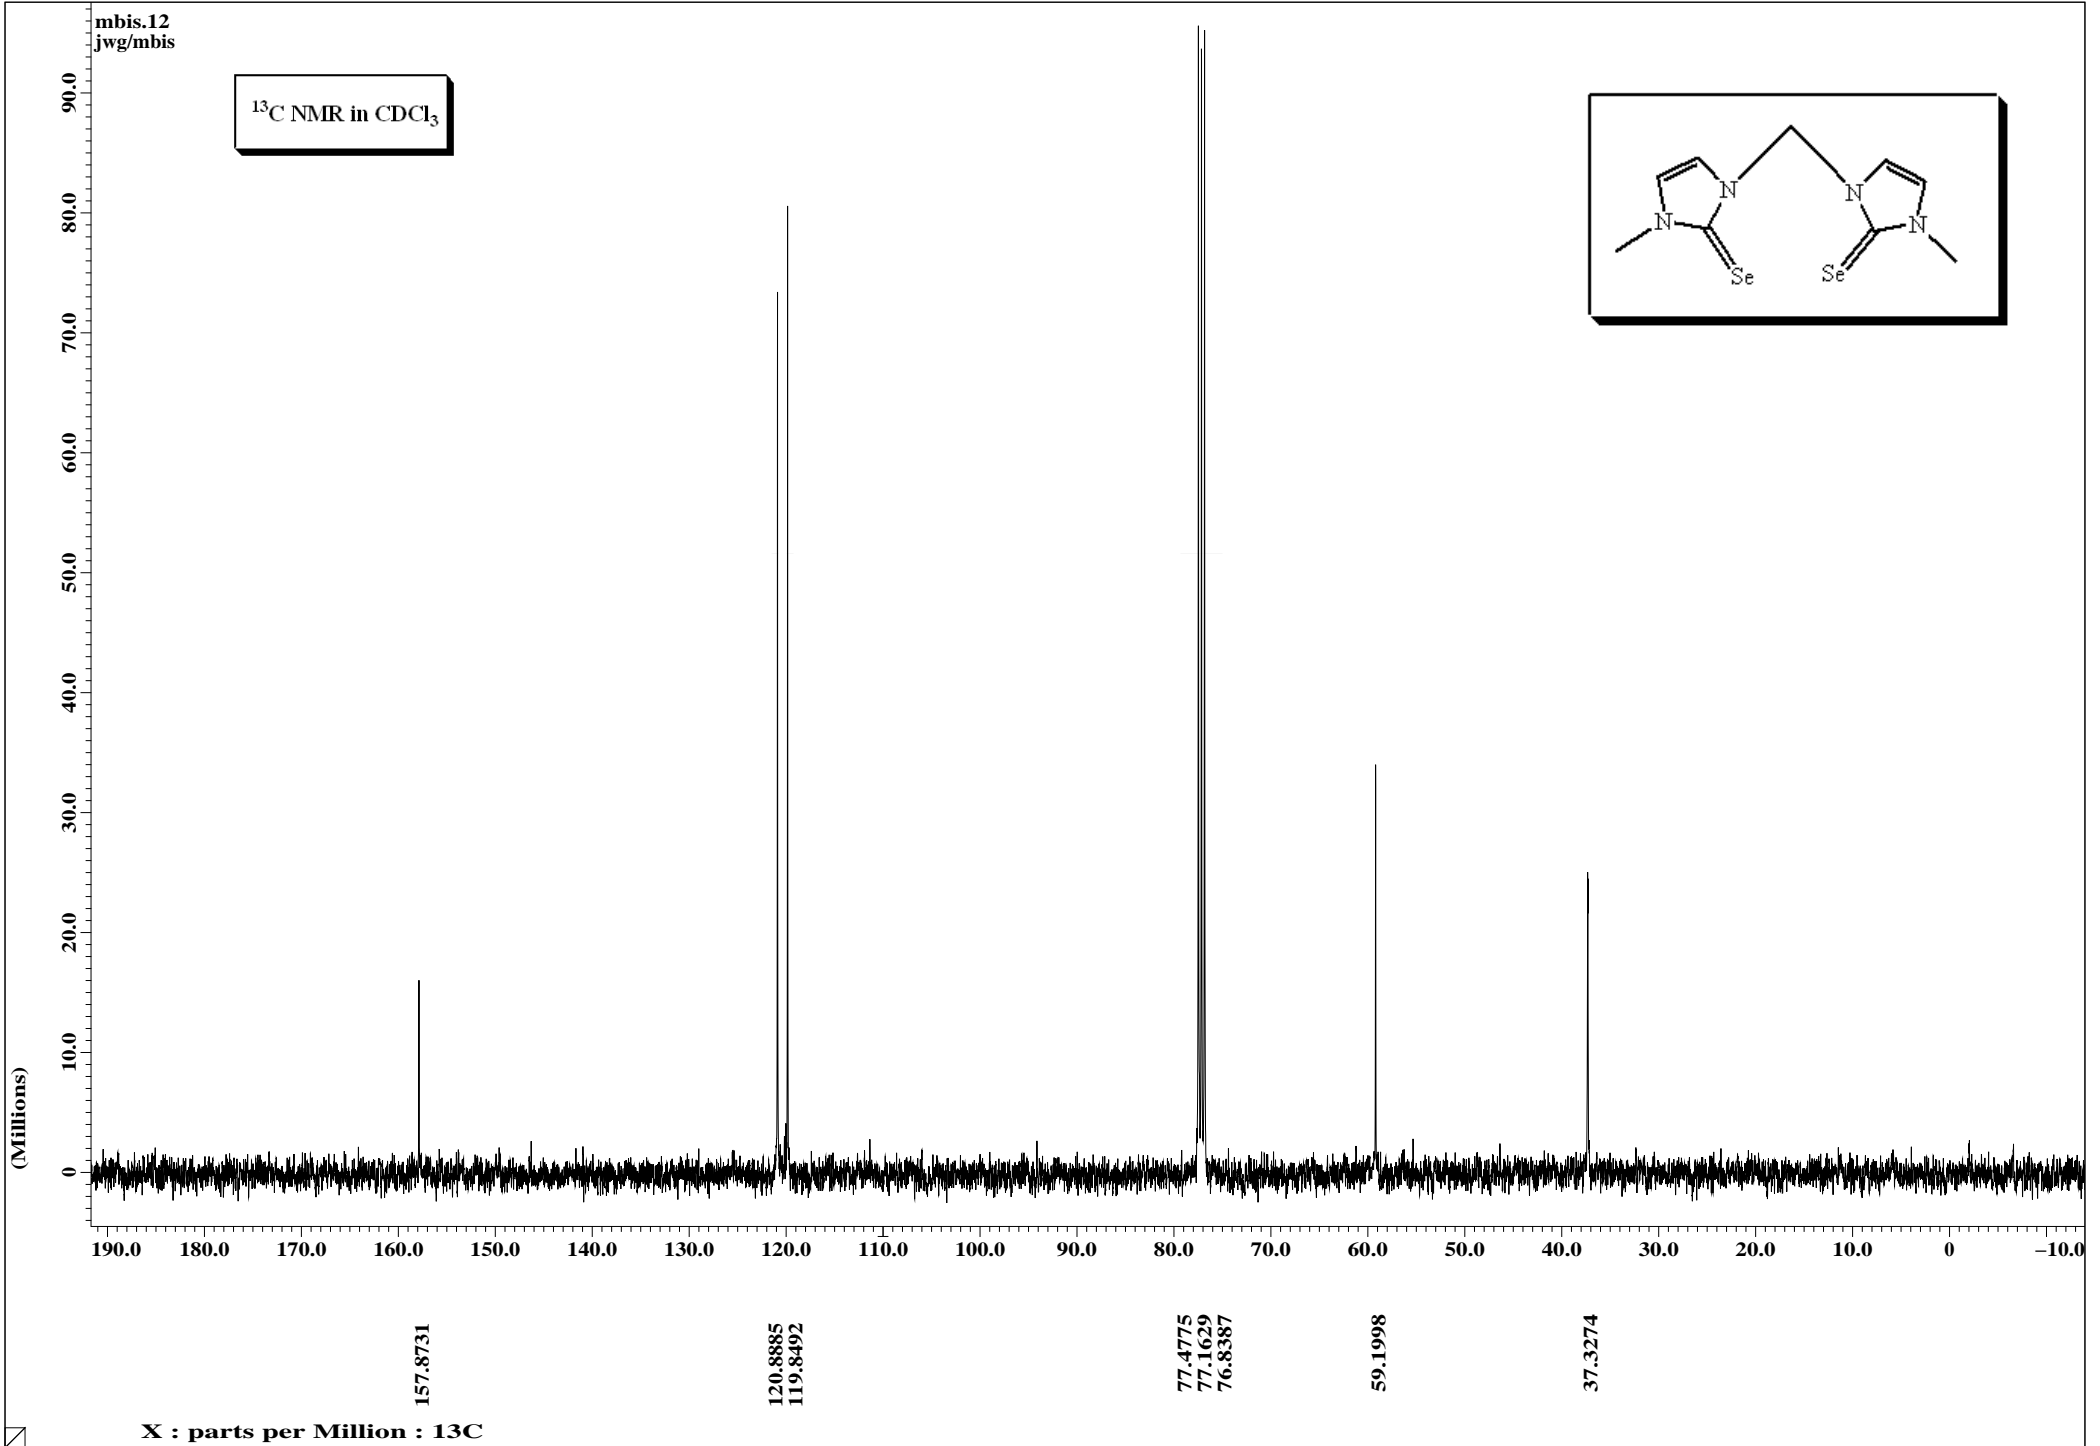

070609o.7  
jwg-3

<sup>1</sup>H NMR in CDCl<sub>3</sub>

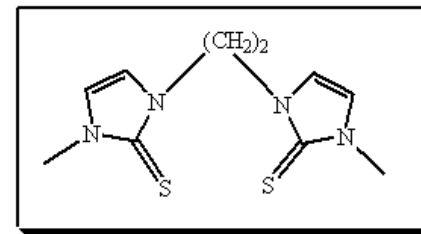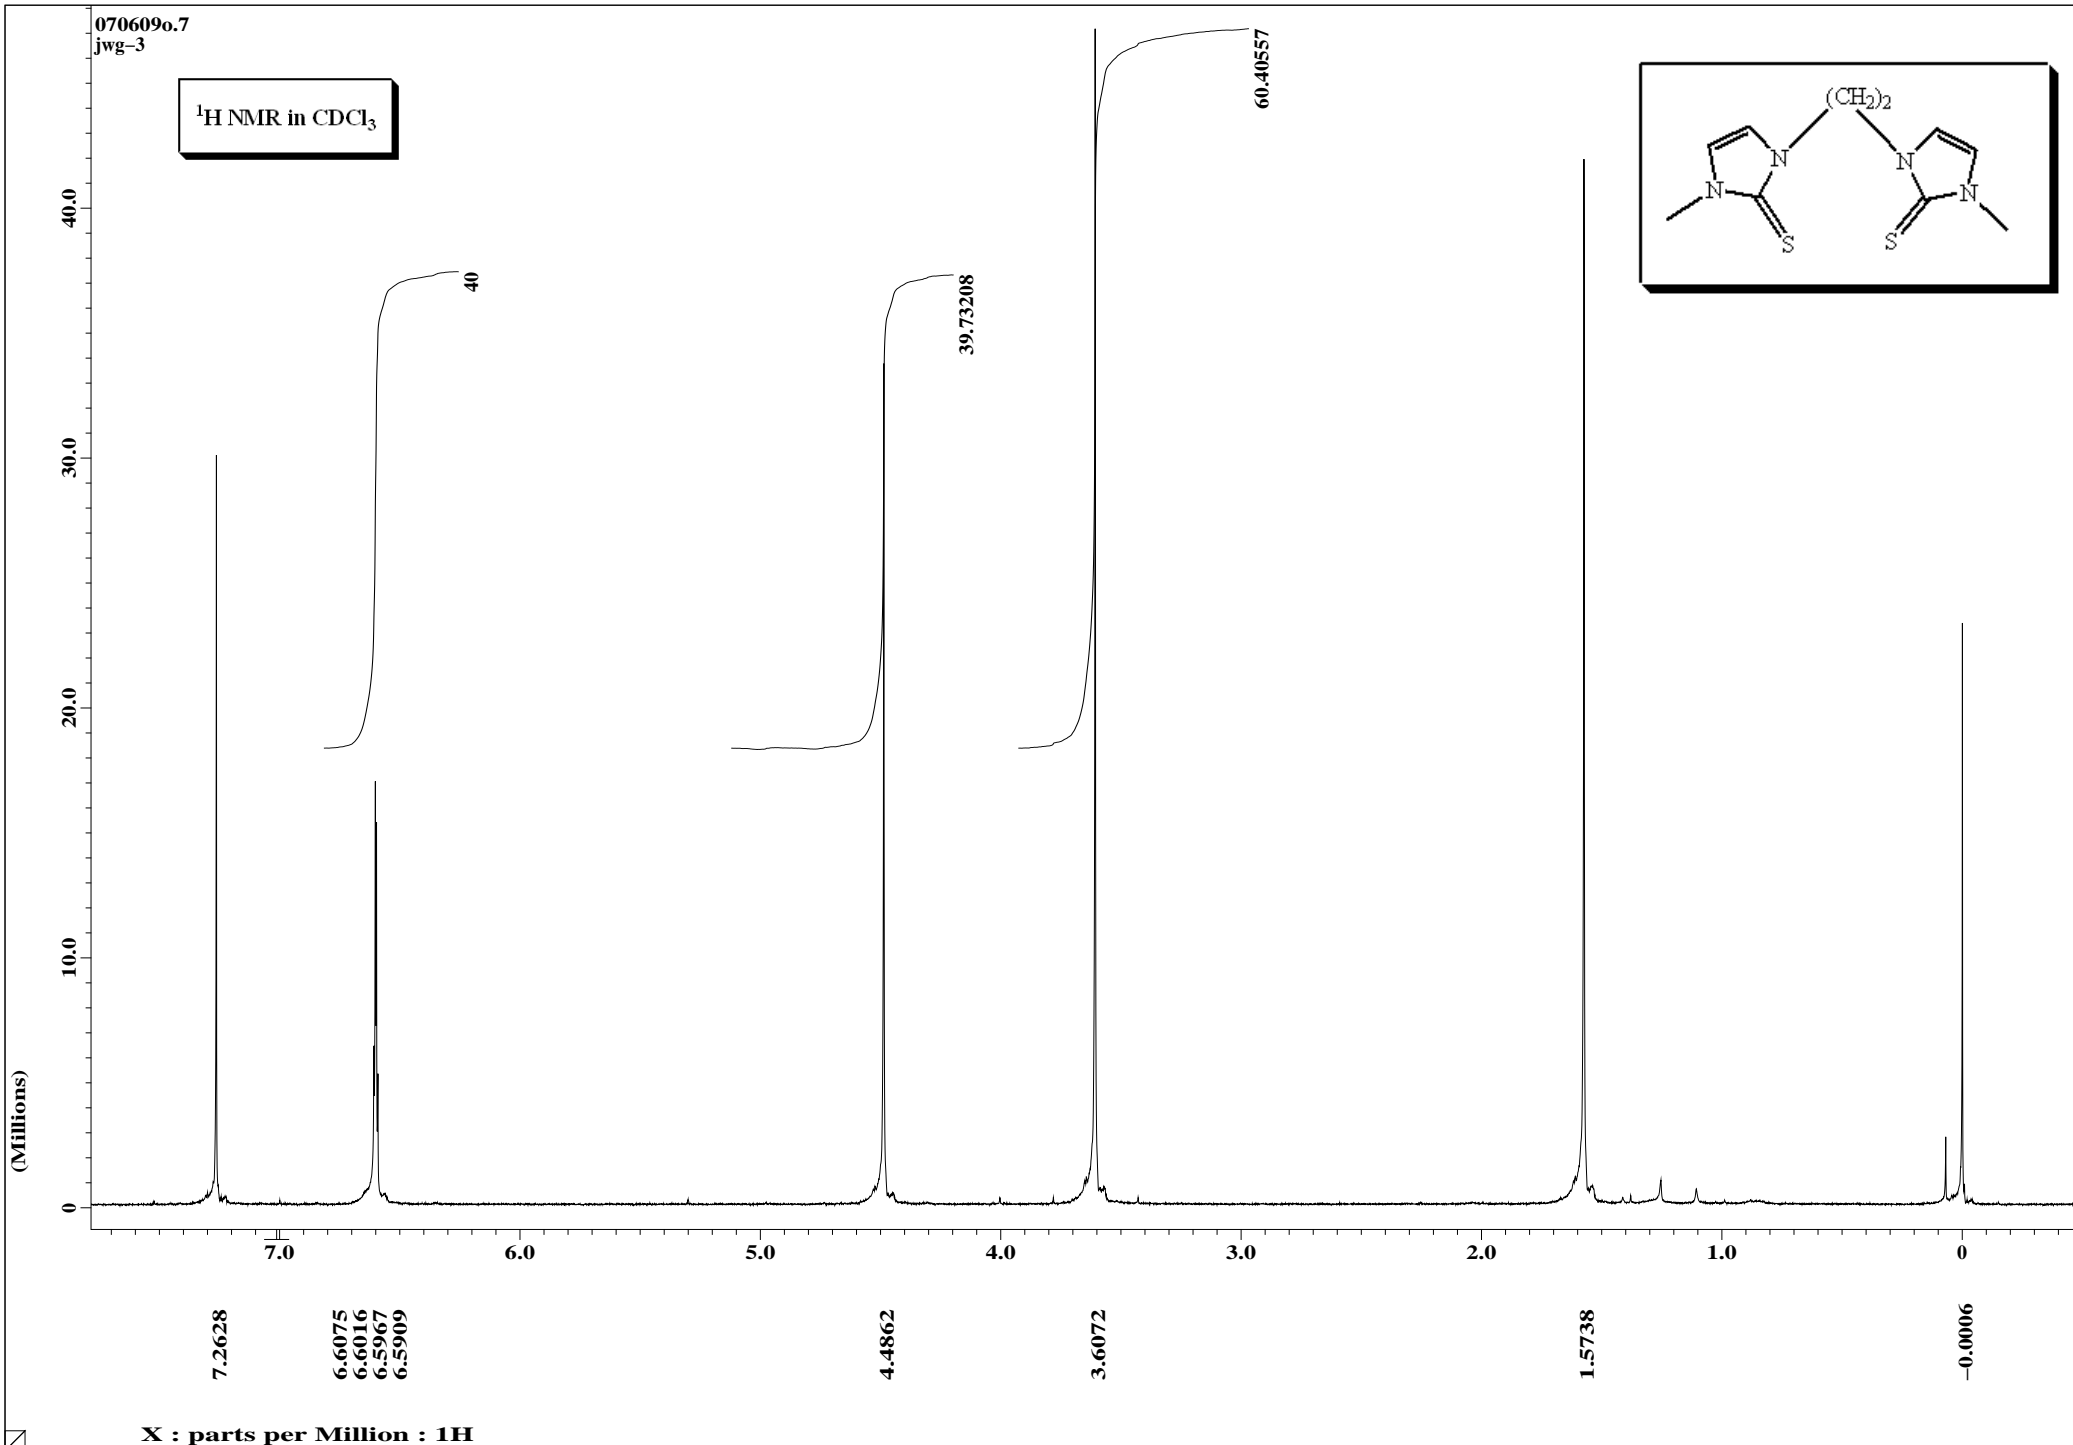

070518J\_copy.8  
jwg-2

$^{13}\text{C}$  NMR in  $\text{CDCl}_3$

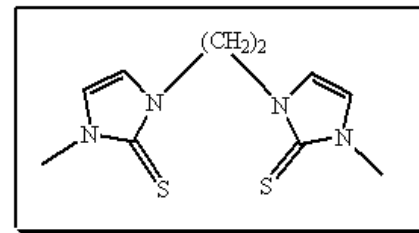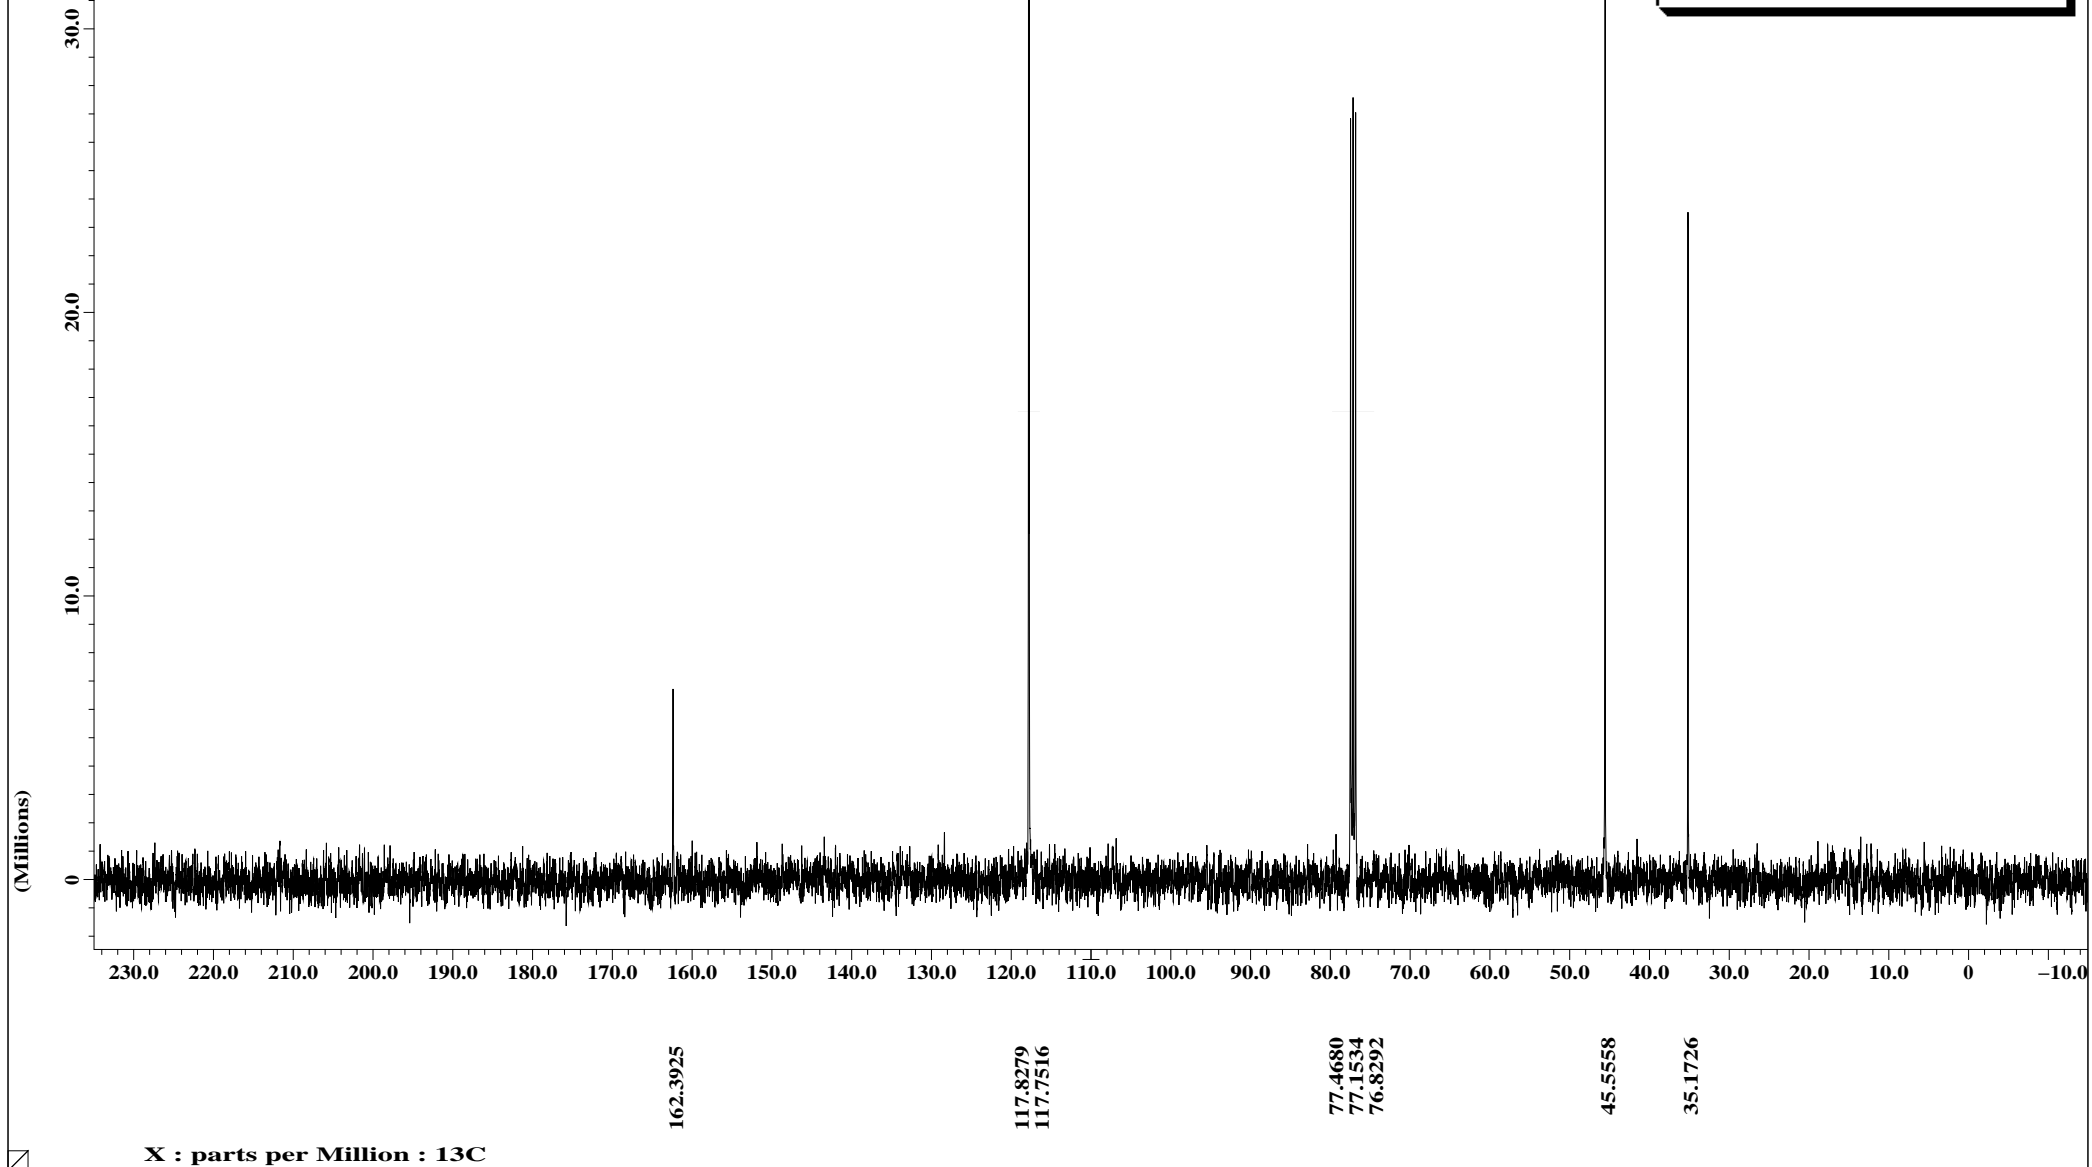

ebis.14  
jwg/ebis

<sup>1</sup>H NMR in CDCl<sub>3</sub>

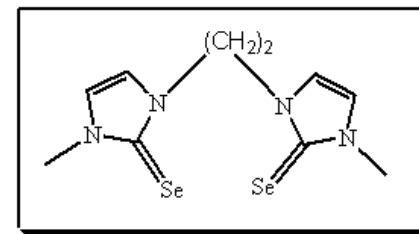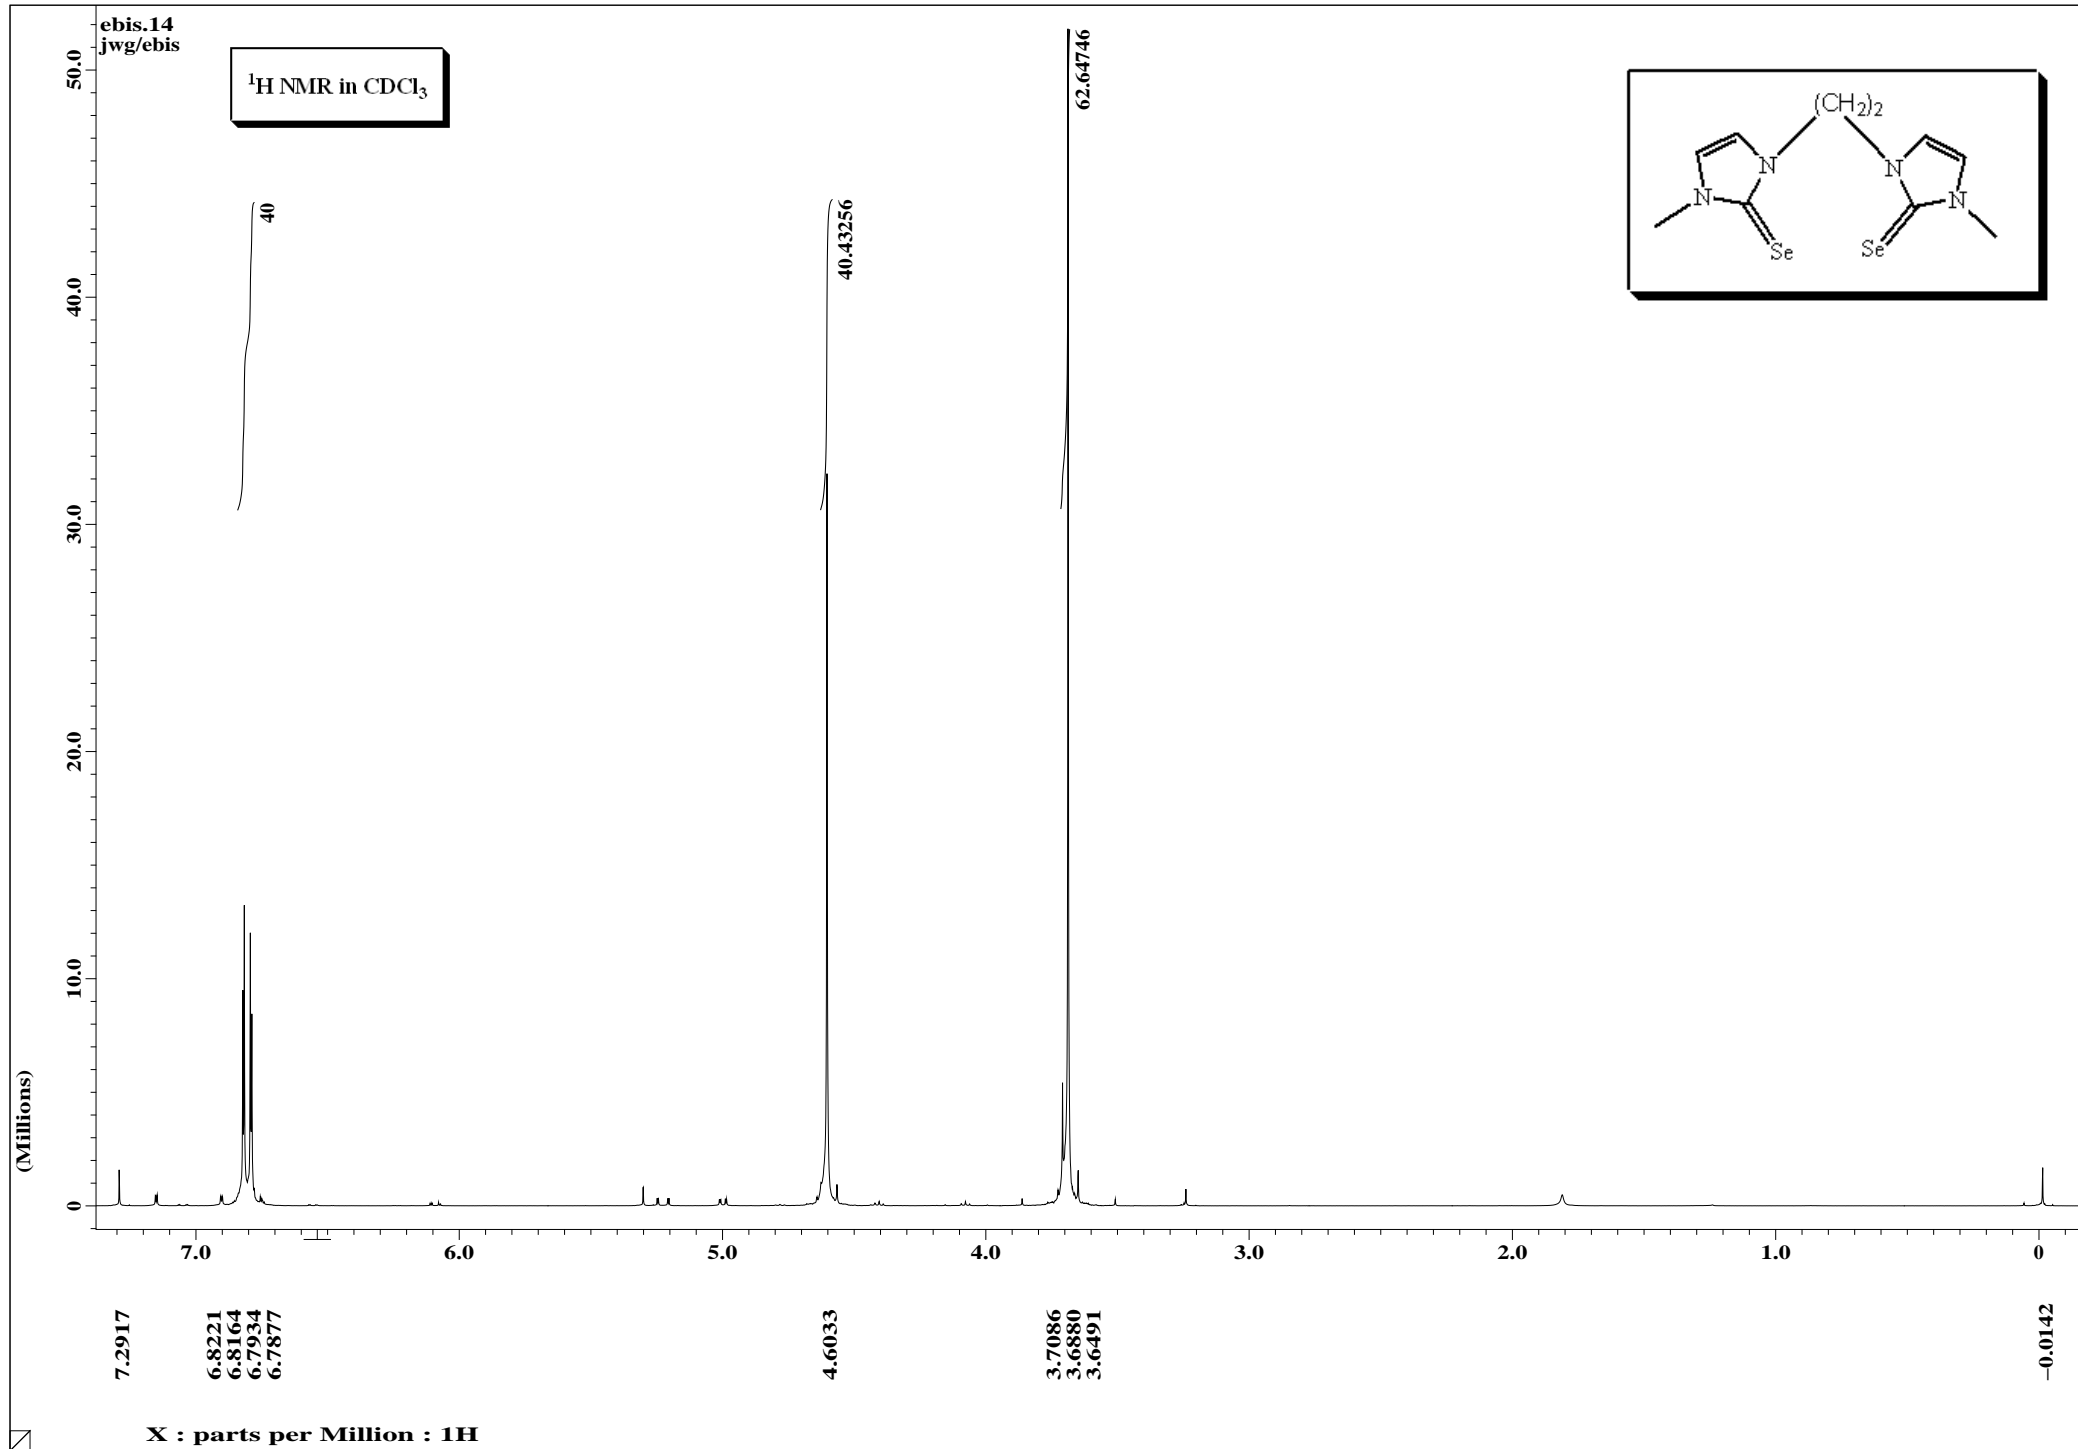

ebis.18  
jwg/ebis

$^{13}\text{C}$  NMR in  $\text{CDCl}_3$

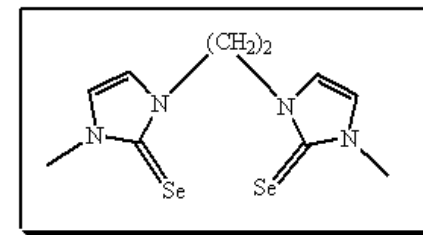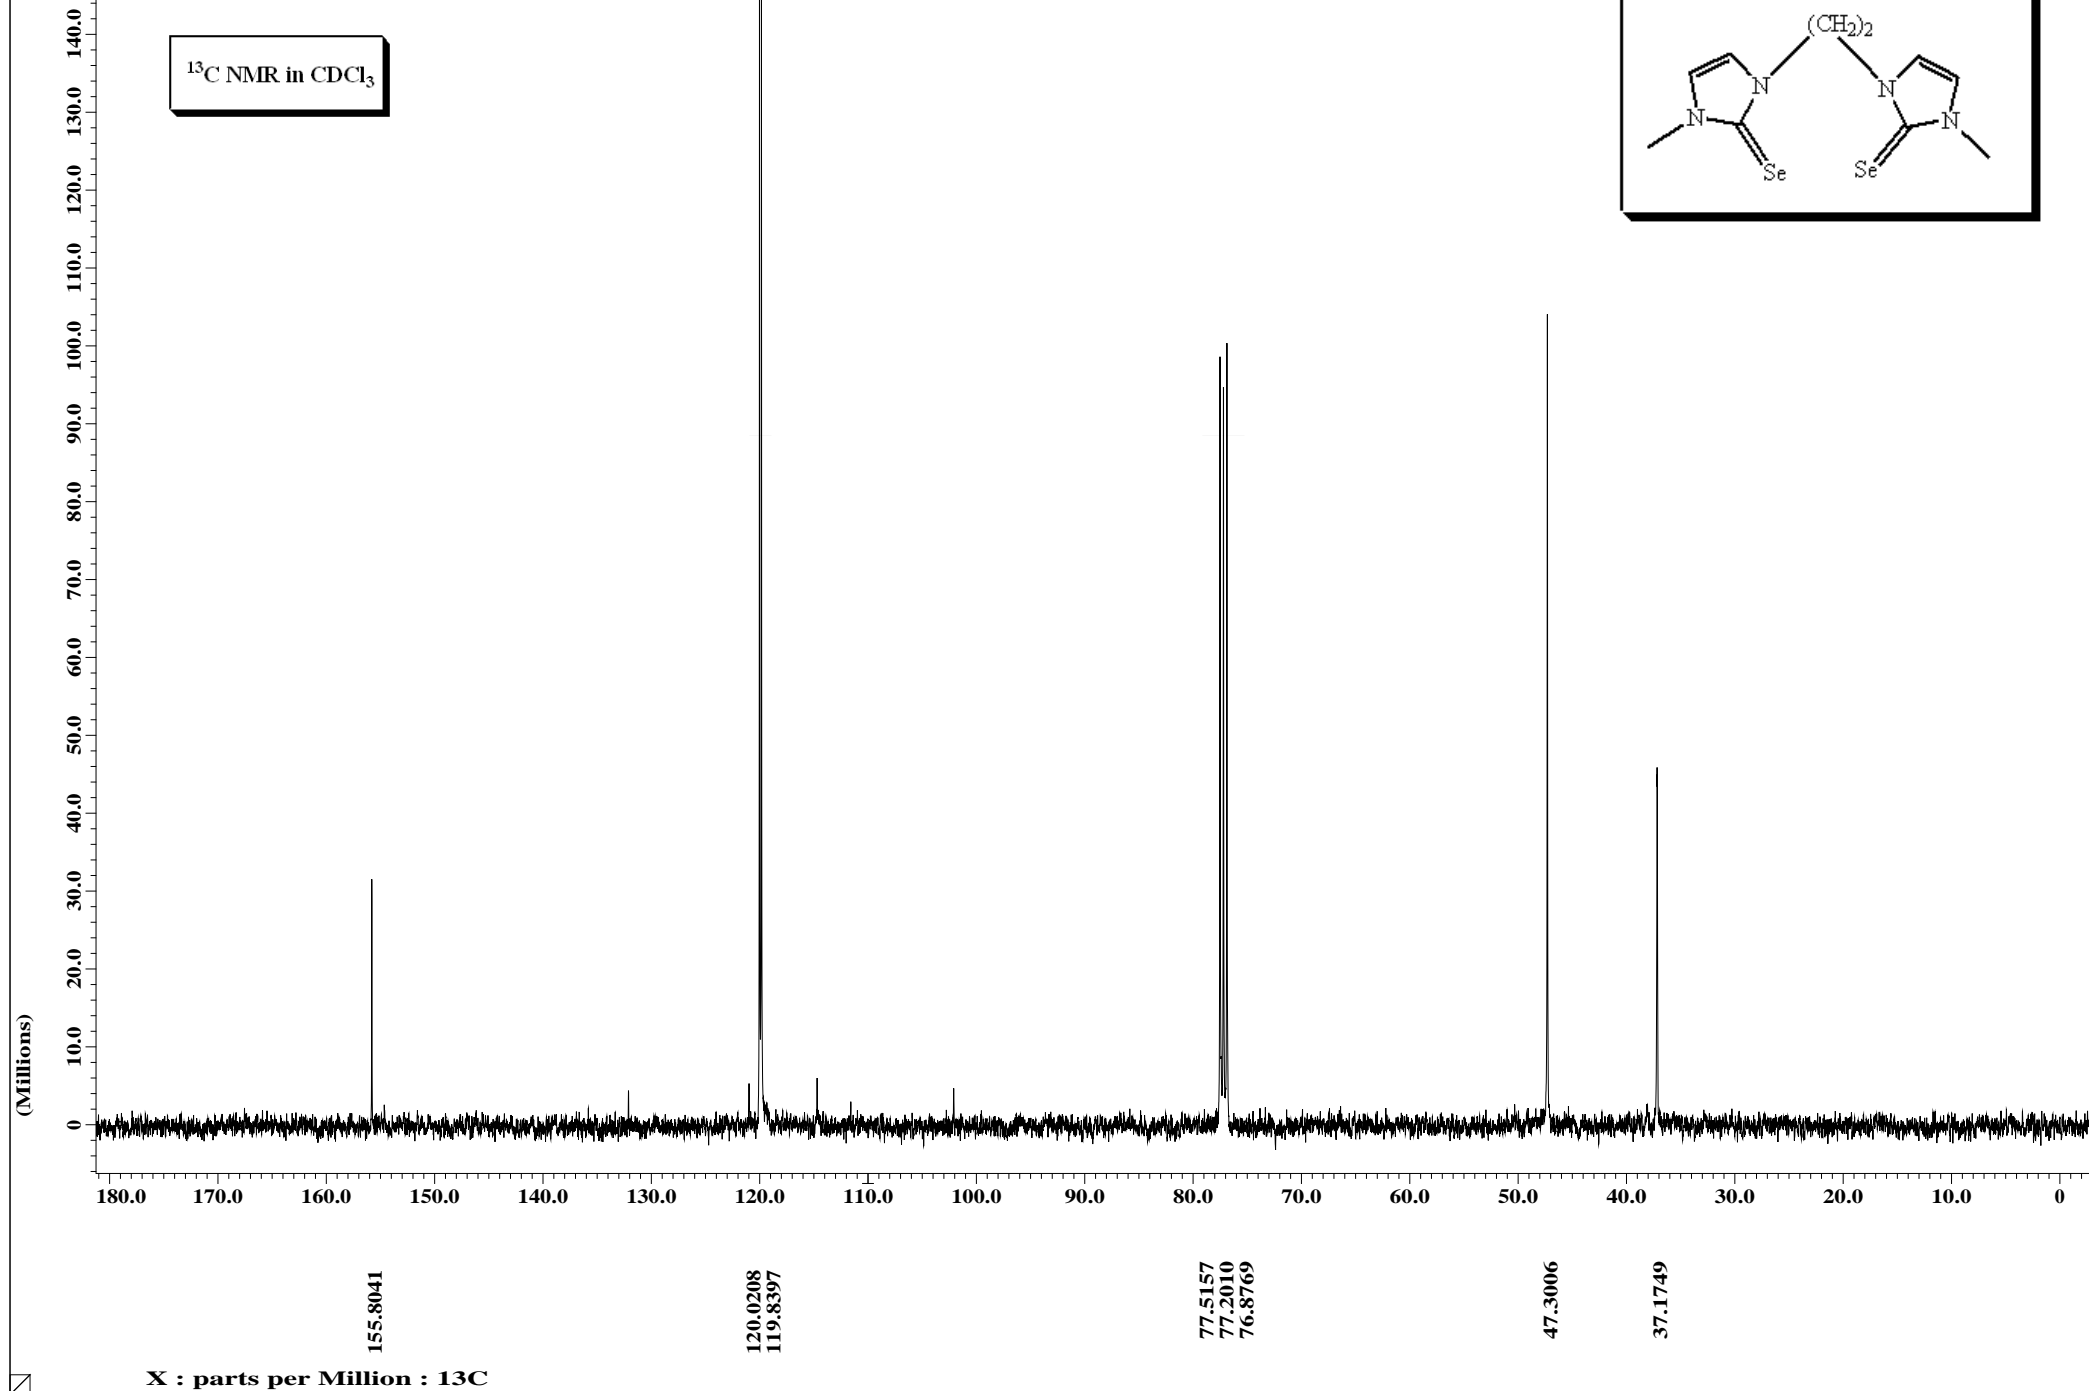



Cp\_Ir-Mbit.8  
jwg/Cp\*Ir-Mbit

<sup>1</sup>H NMR in CDCl<sub>3</sub>

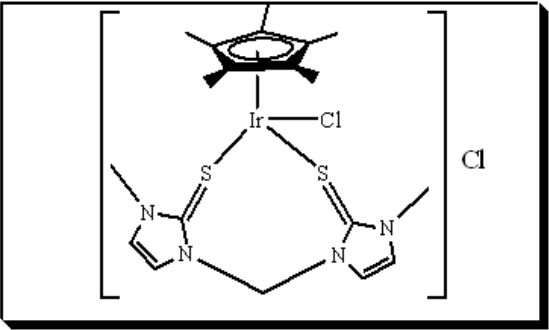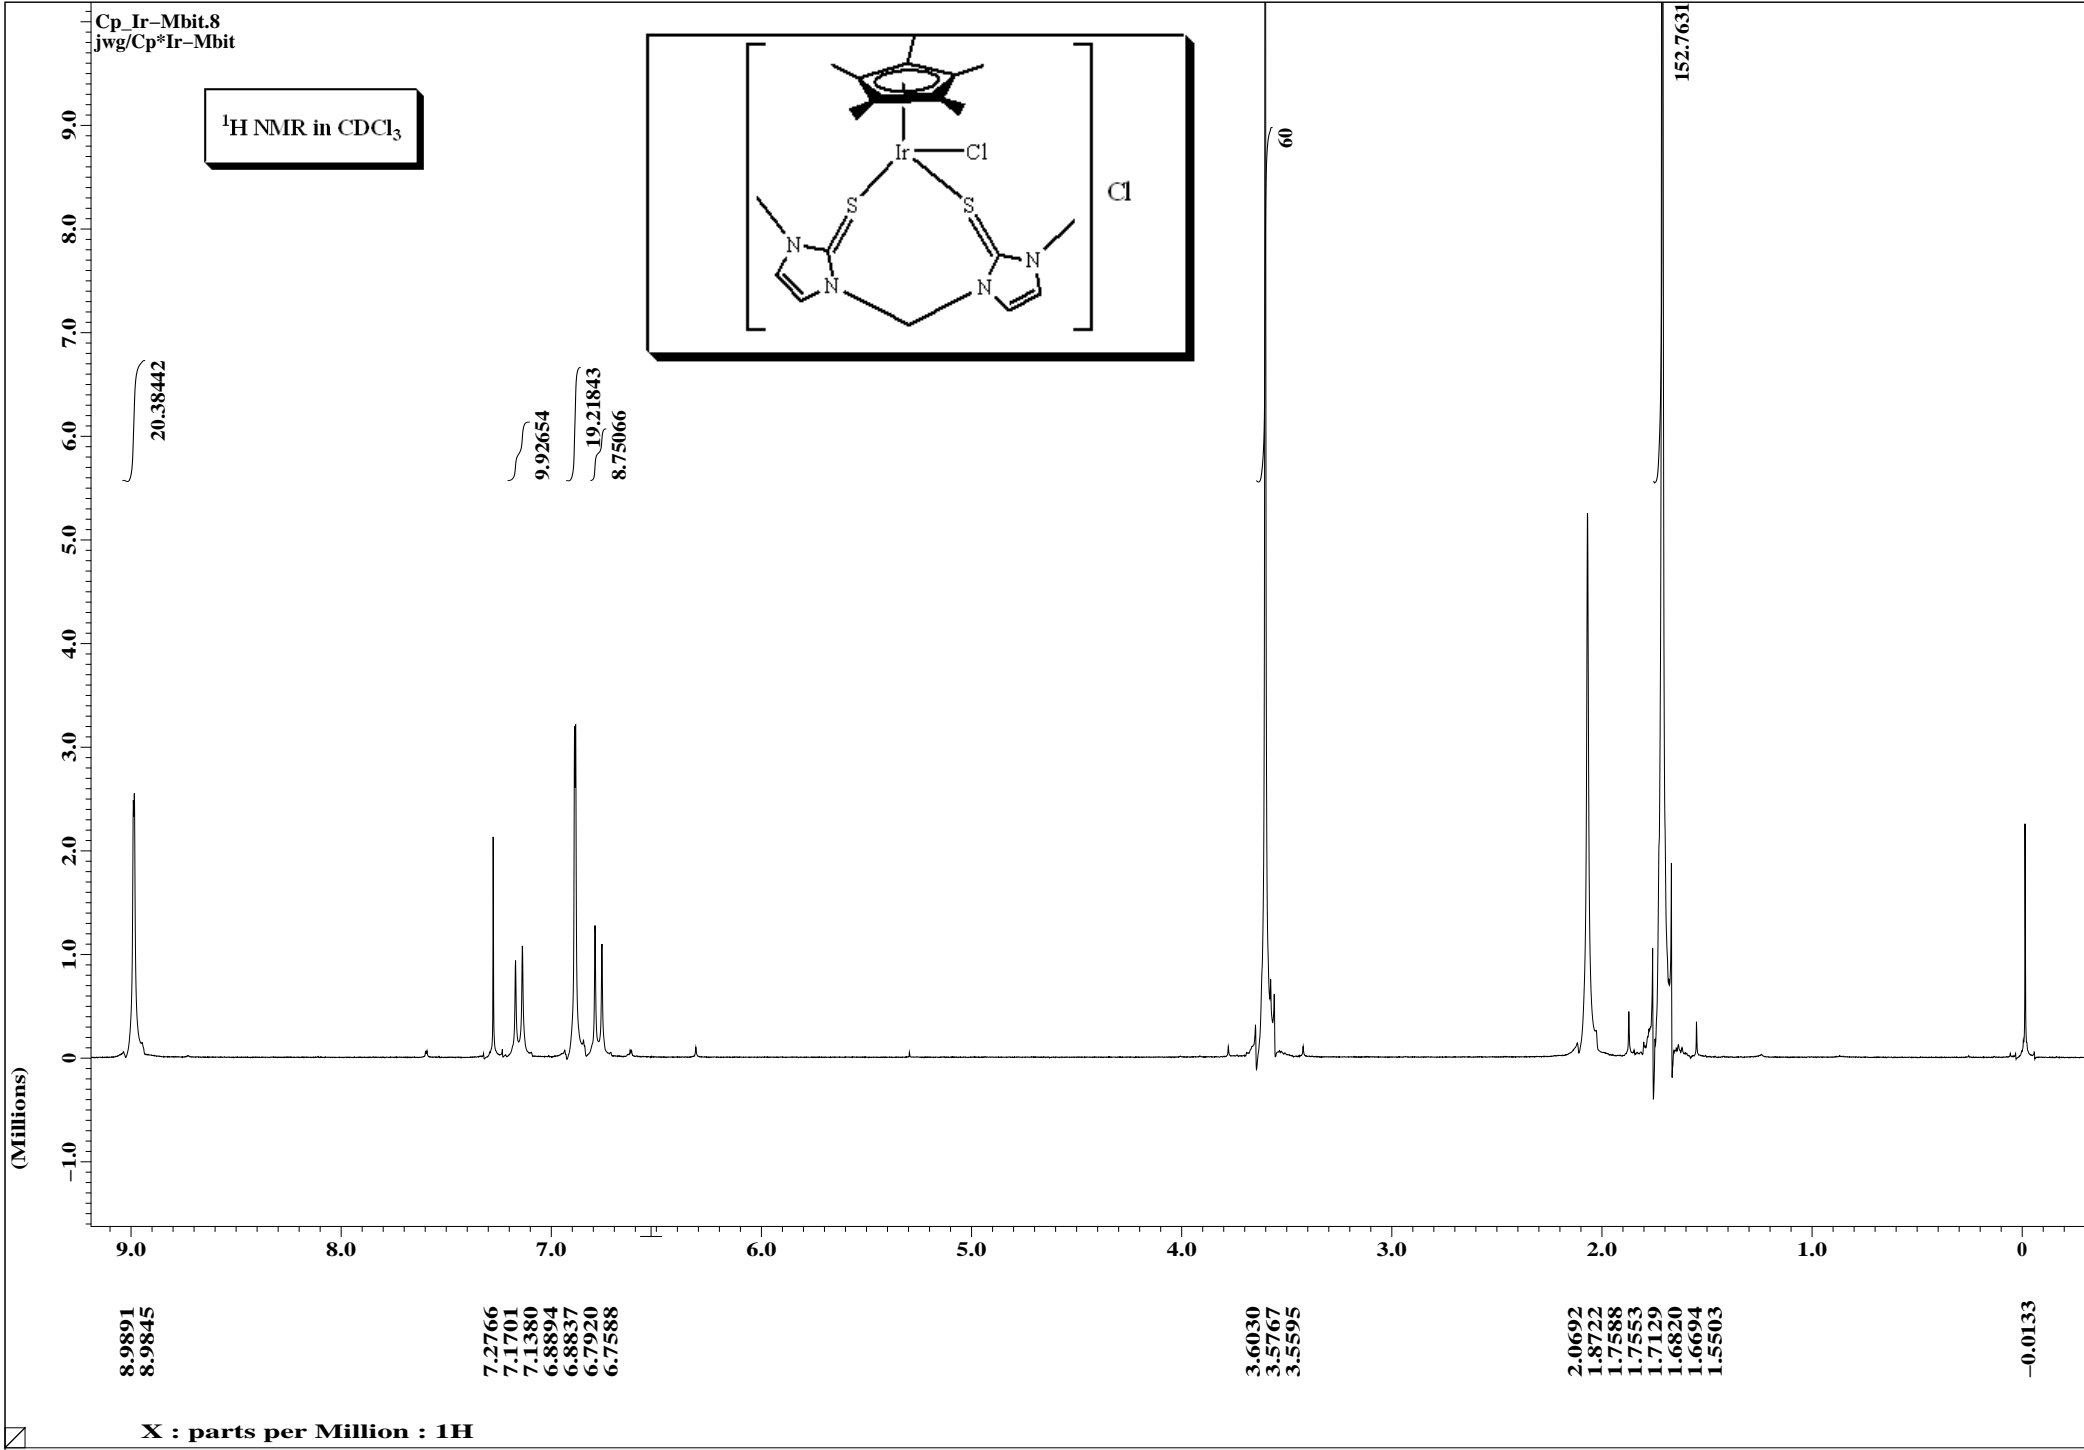

X : parts per Million : 1H

$^{13}\text{C}$  NMR in  $\text{CDCl}_3$

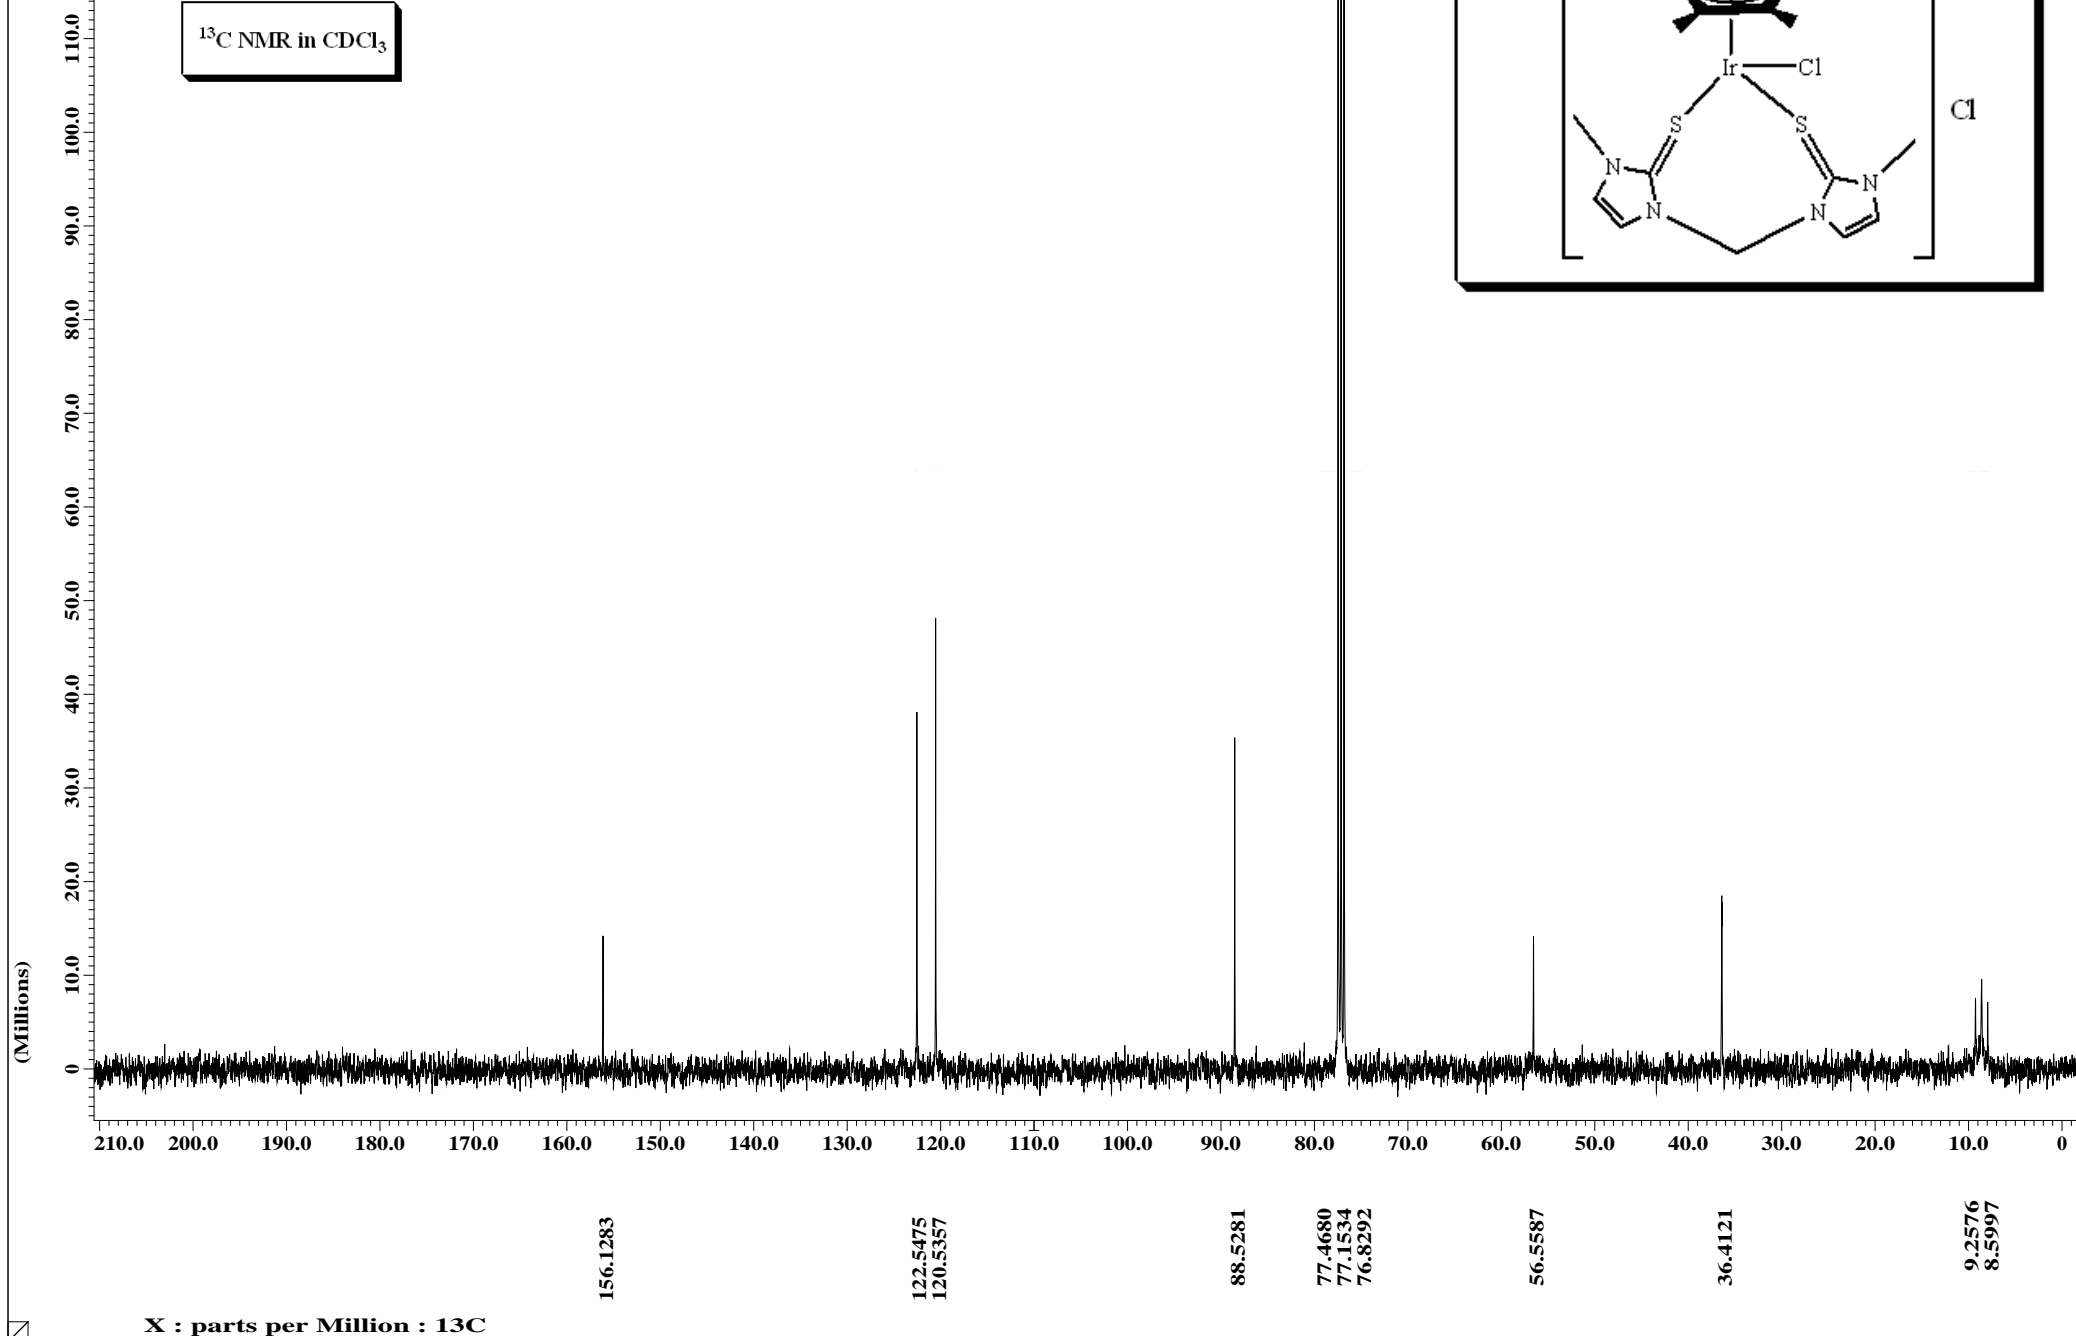

Cp\_Ir-mbis.7  
jwg/Cp\*Ir-mbis

$^1\text{H}$  NMR in  $\text{CDCl}_3$

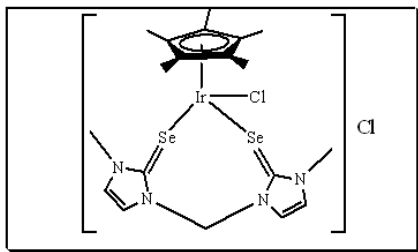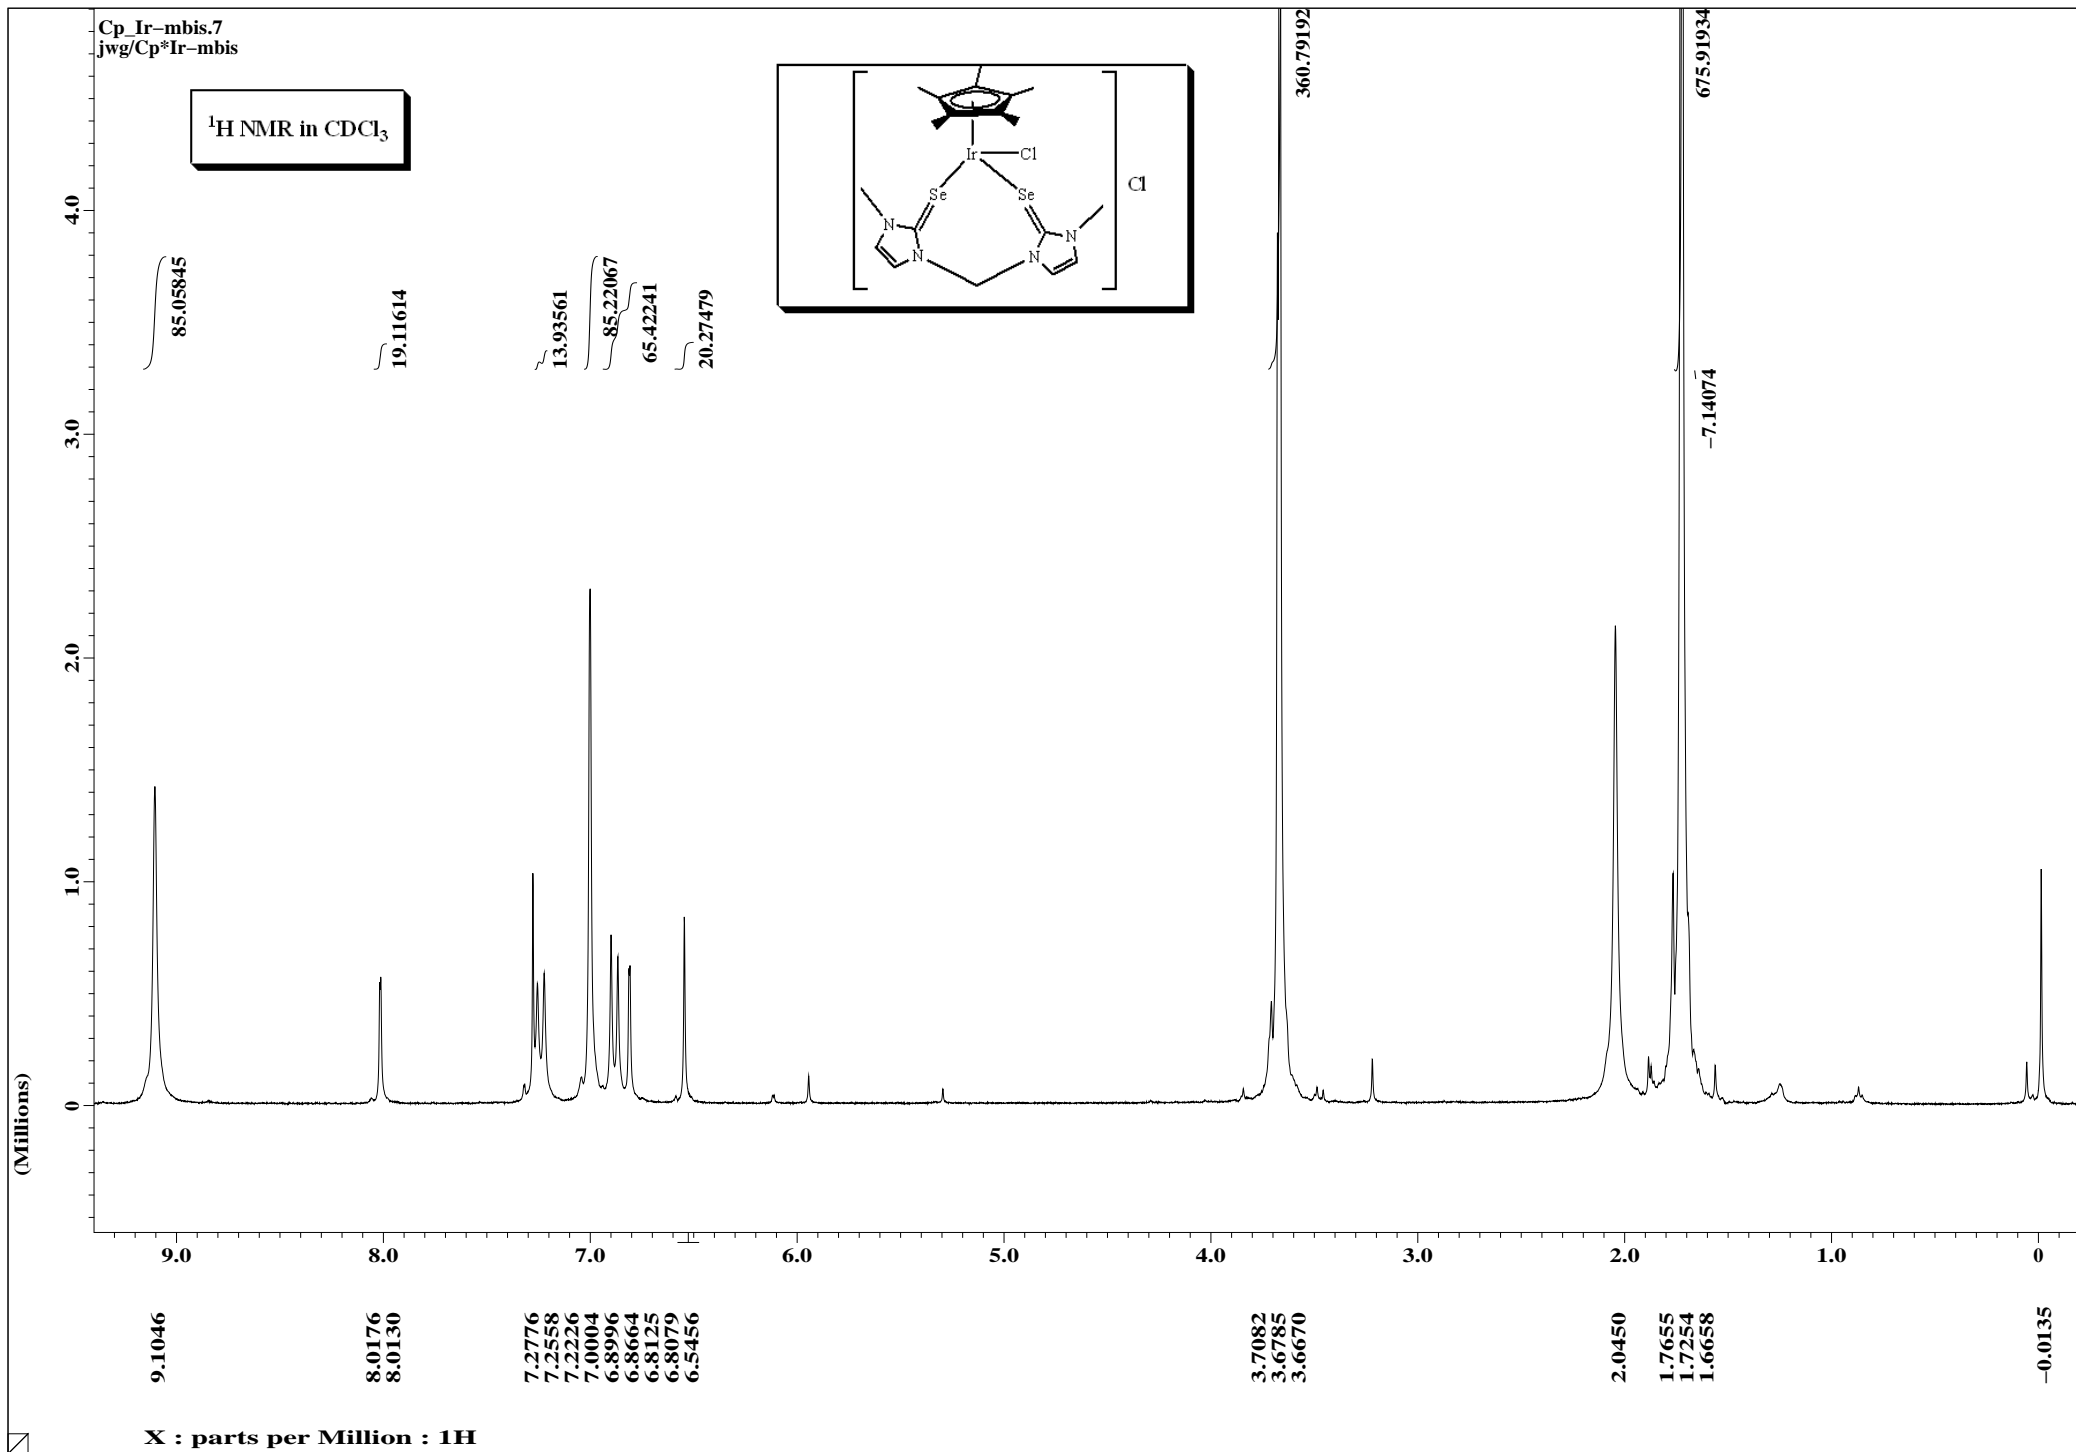

X : parts per Million : 1H

Cp\_Ir-Mbis.4  
jwg/Cp\*Ir-Mbis

<sup>13</sup>C NMR in CDCl<sub>3</sub>

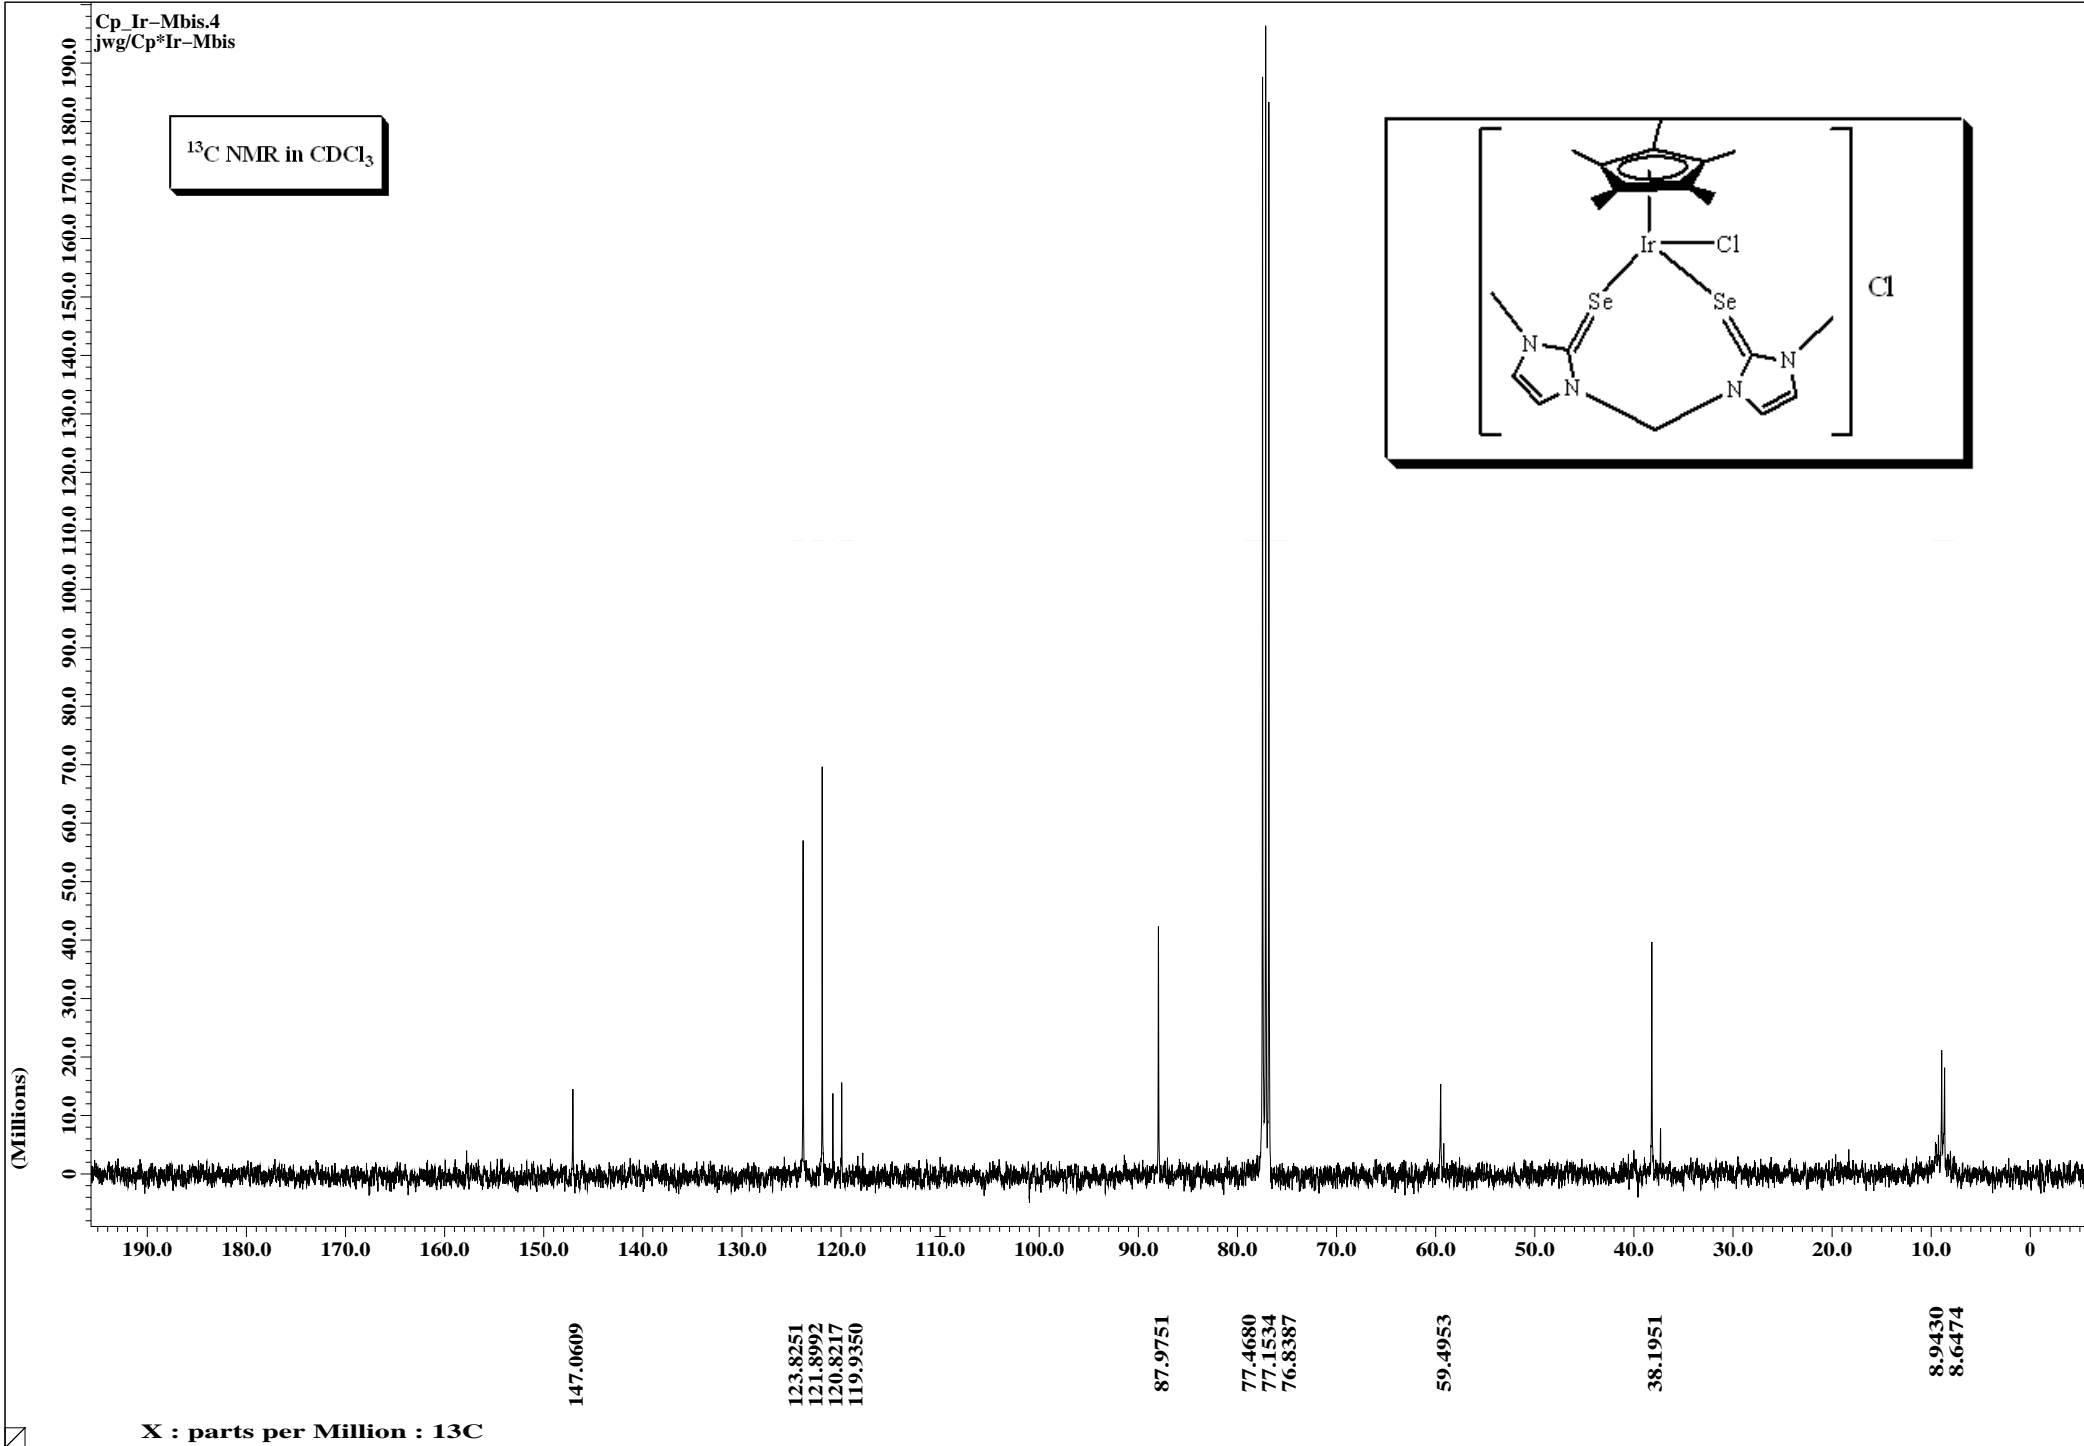

Cp\_Ir-Ebit.10  
jwg/mbis

<sup>1</sup>H NMR in CDCl<sub>3</sub>

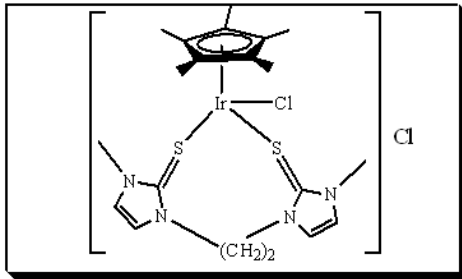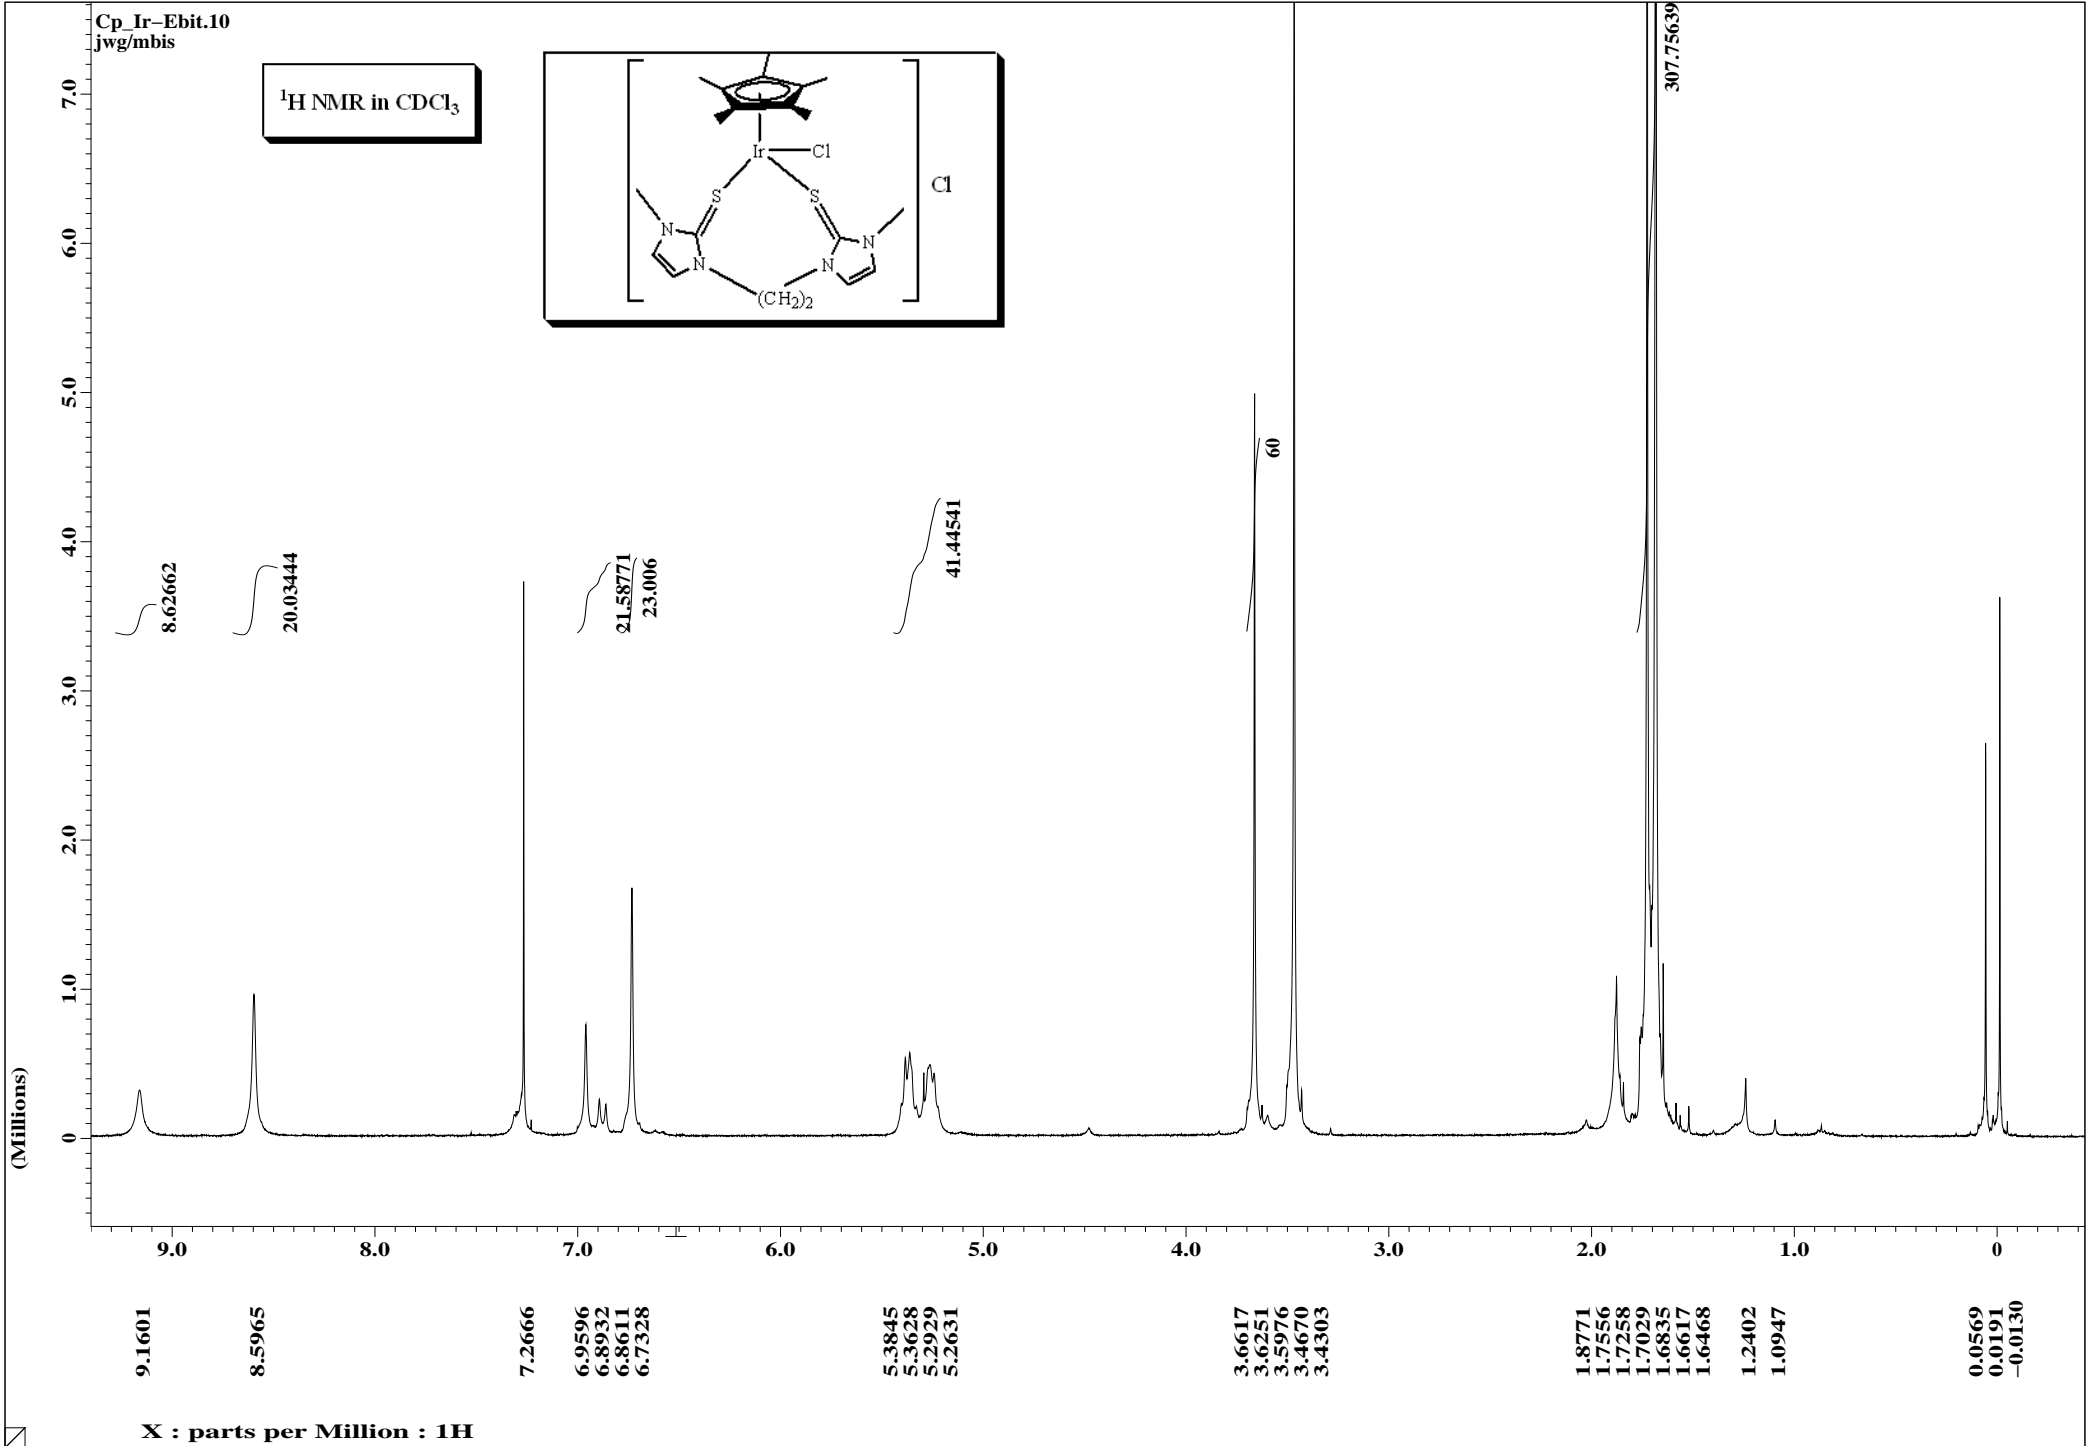

X : parts per Million : 1H

Cp\_Ir-Ebit.16  
jwg/Cp\*Ir-Ebit

$^{13}\text{C}$  NMR in  $\text{CDCl}_3$

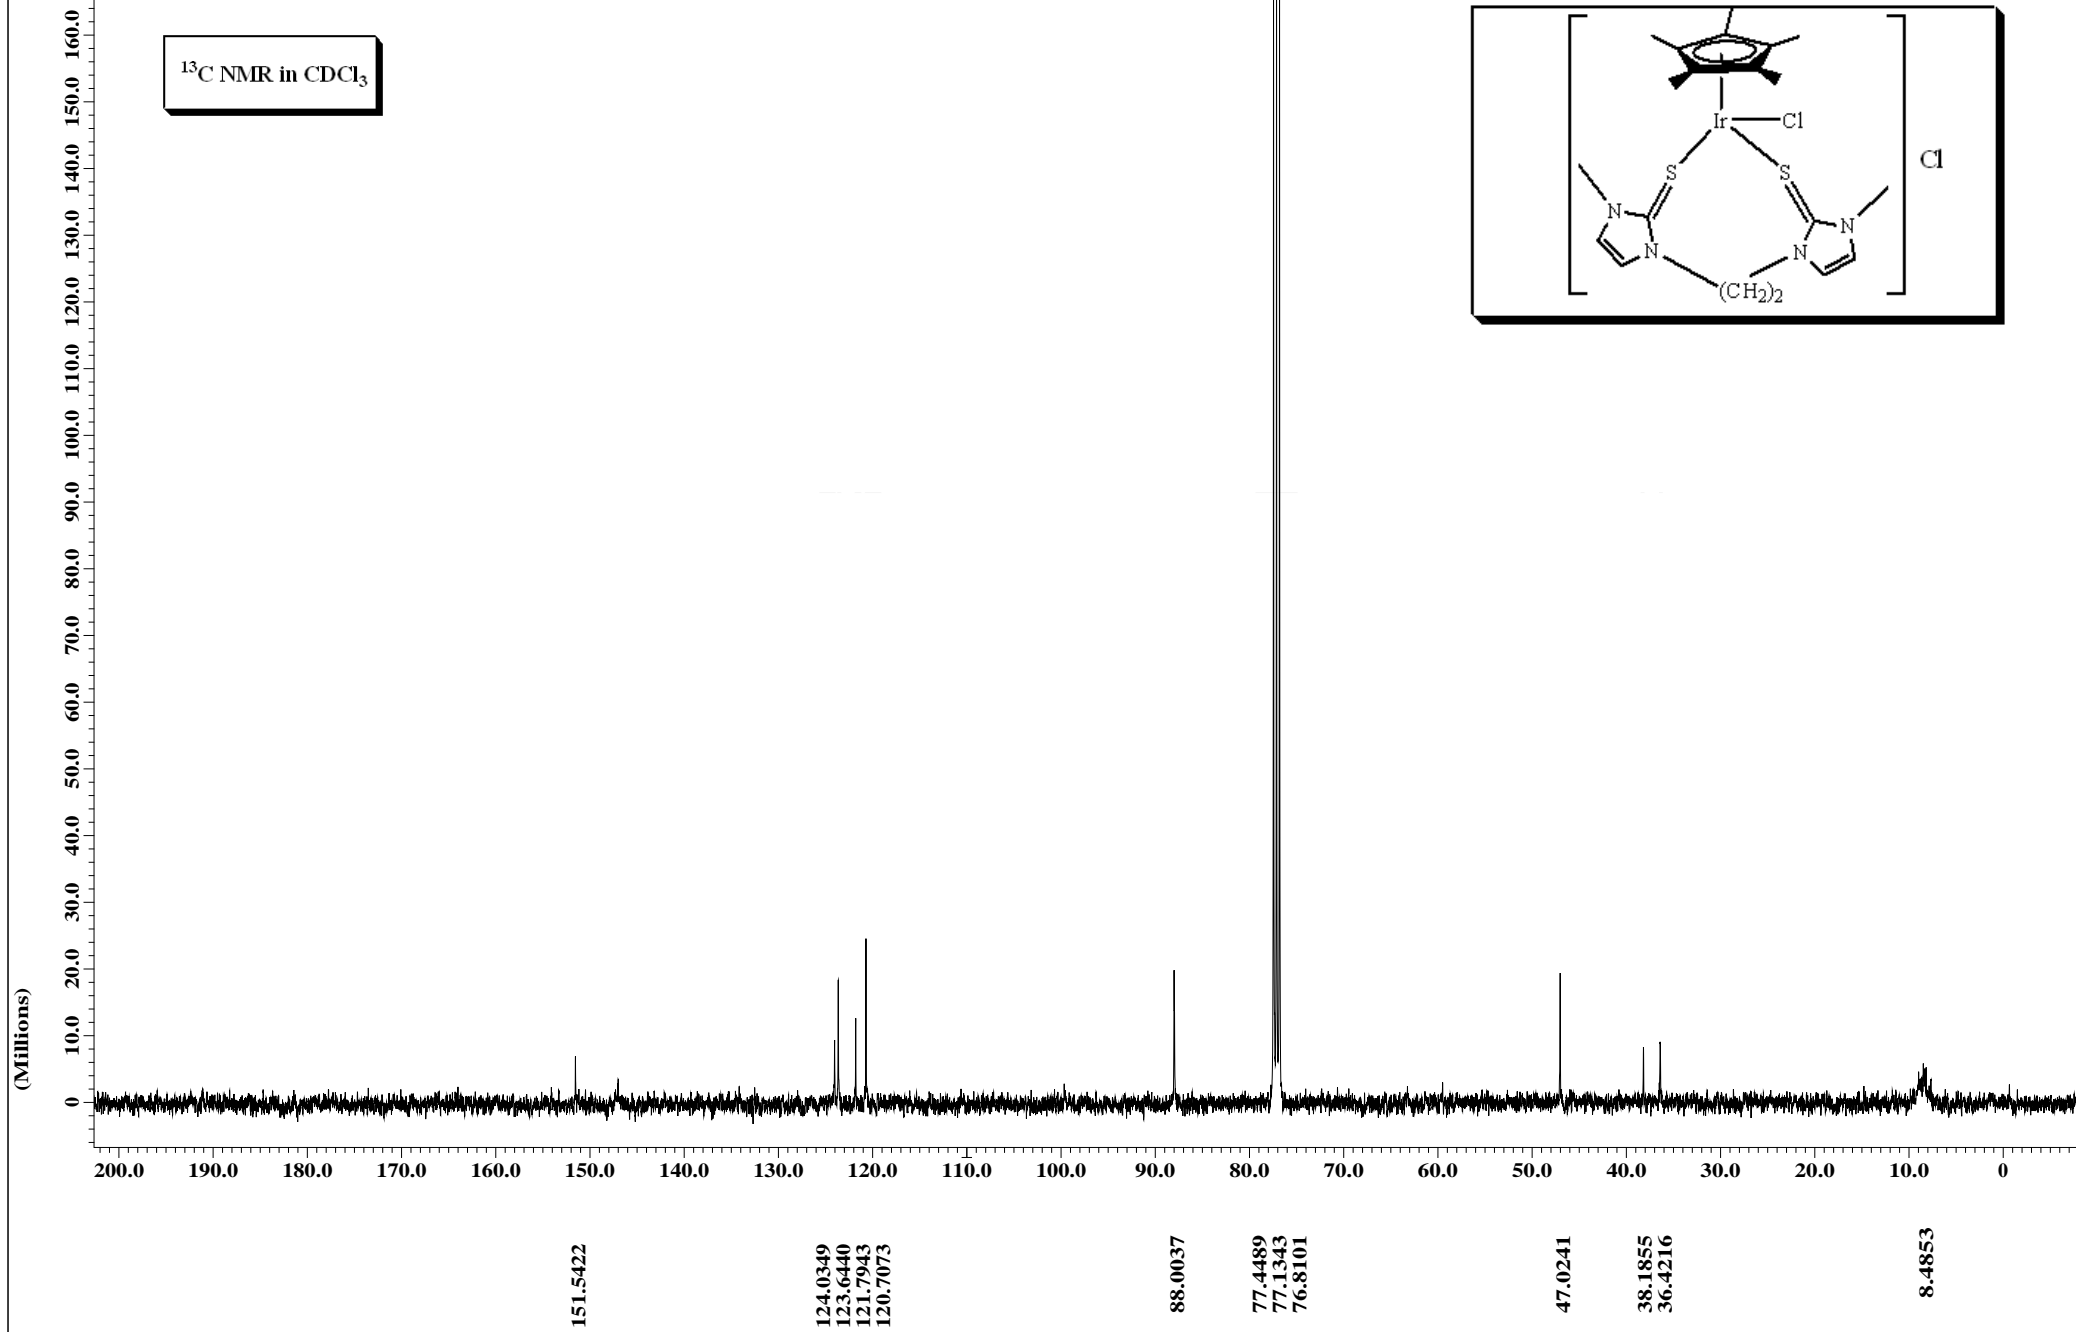

X : parts per Million :  $^{13}\text{C}$

Cp\_Ir-Ebis.7  
jwg/Cp\*Ir-Ebis

$^1\text{H}$  NMR in  $\text{CDCl}_3$

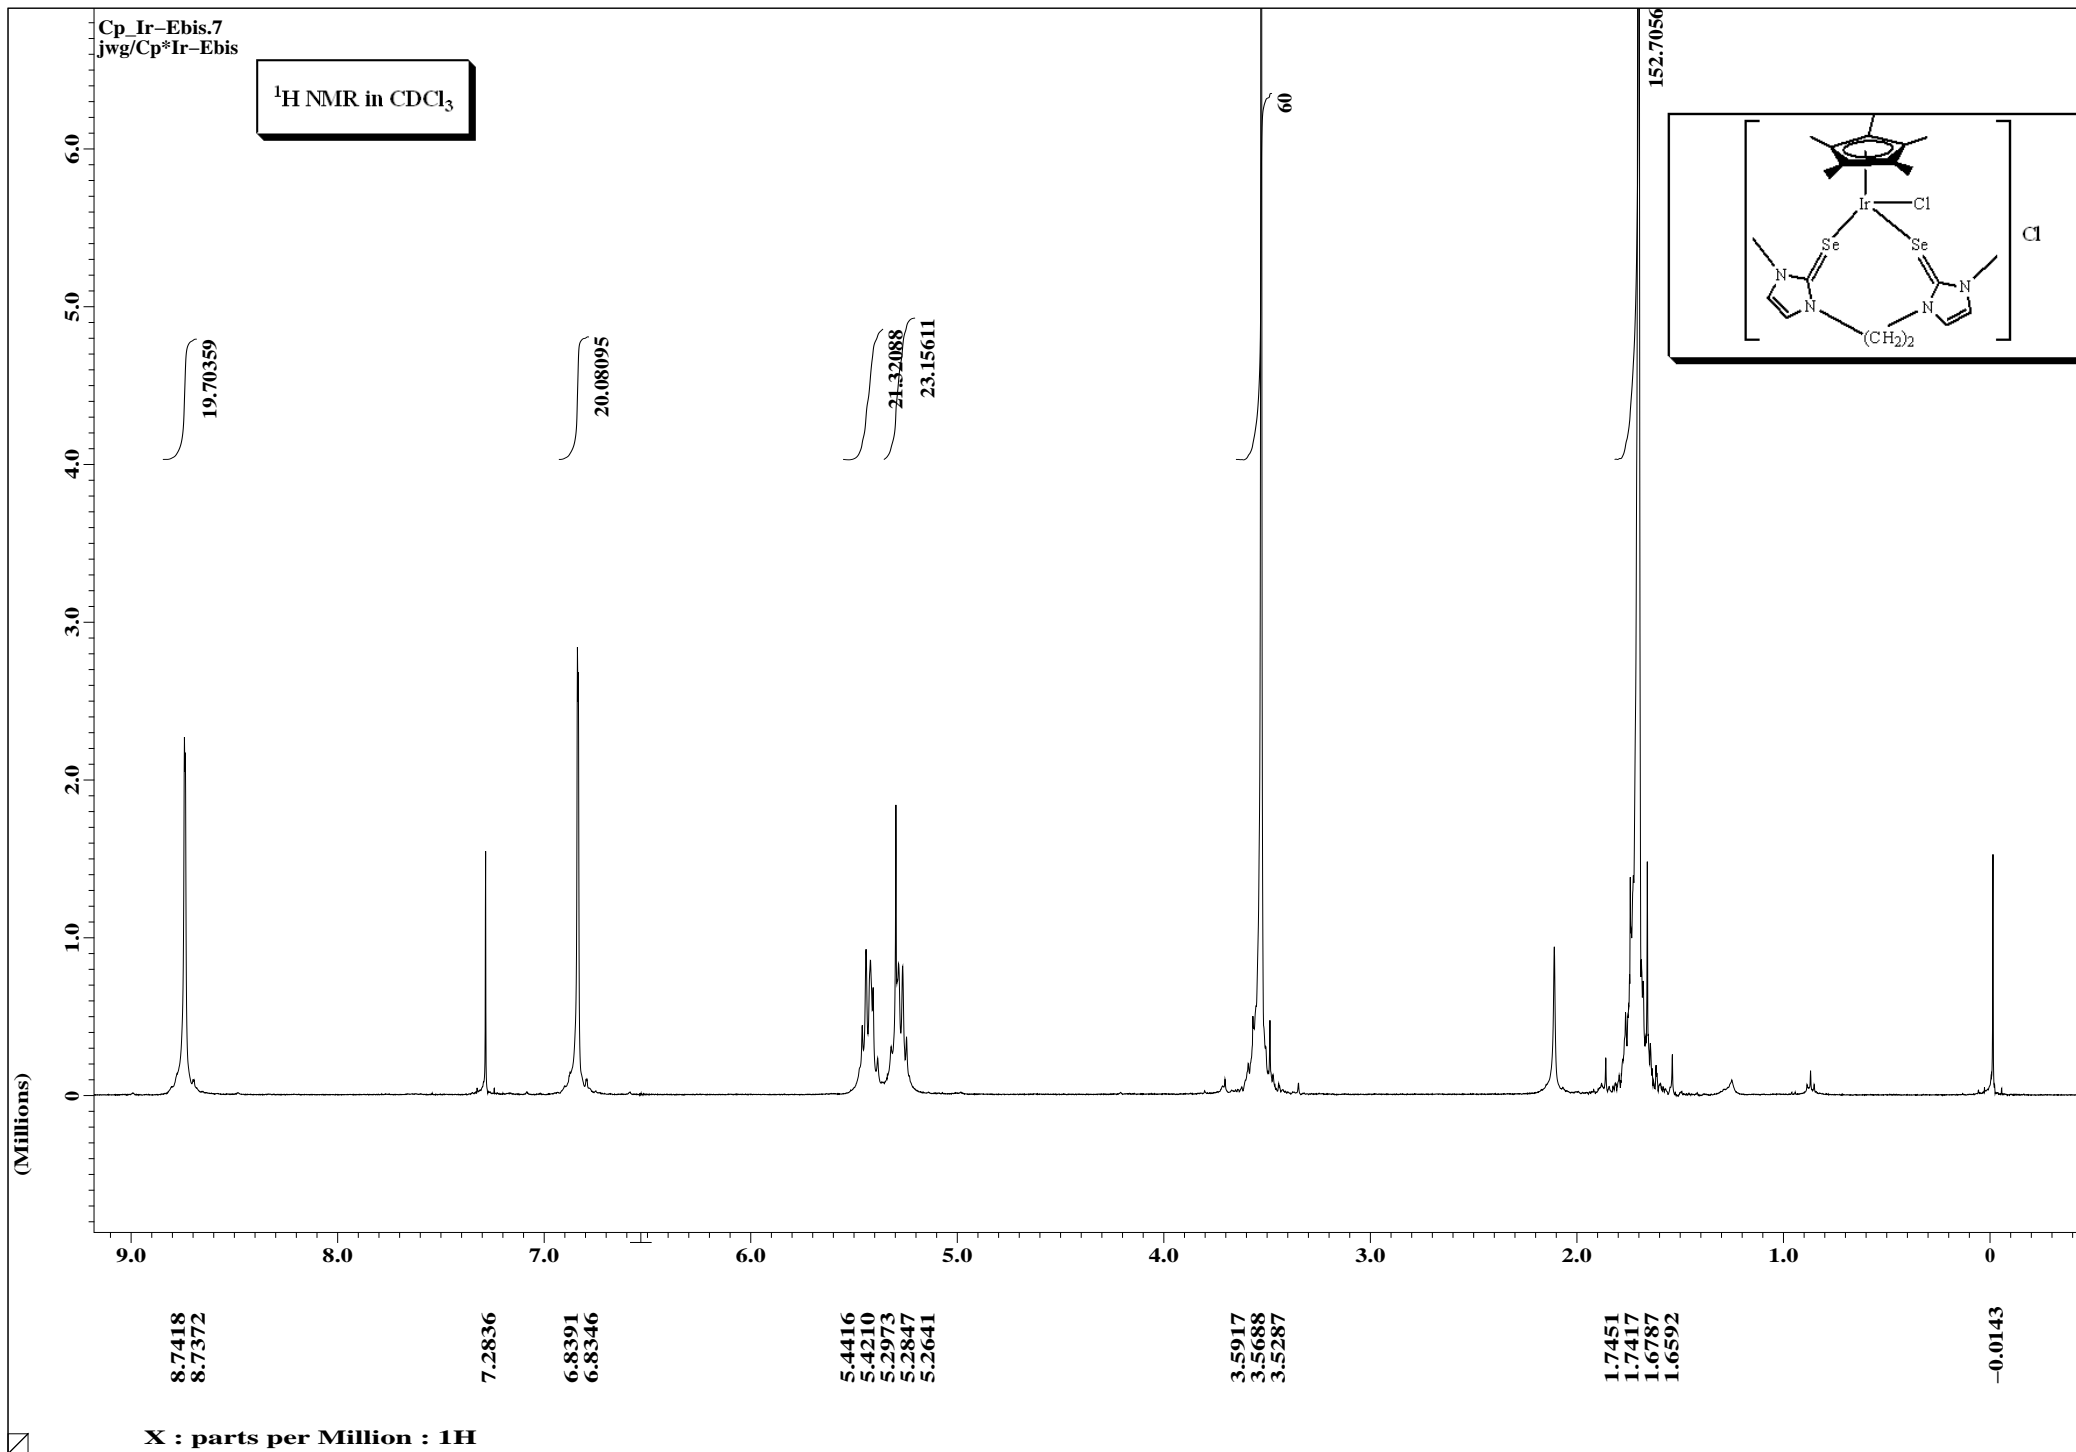

Cp\_Rh-Ebis.16  
jwg/Cp\*Rh-Ebis

$^{13}\text{C}$  NMR in  $\text{CDCl}_3$

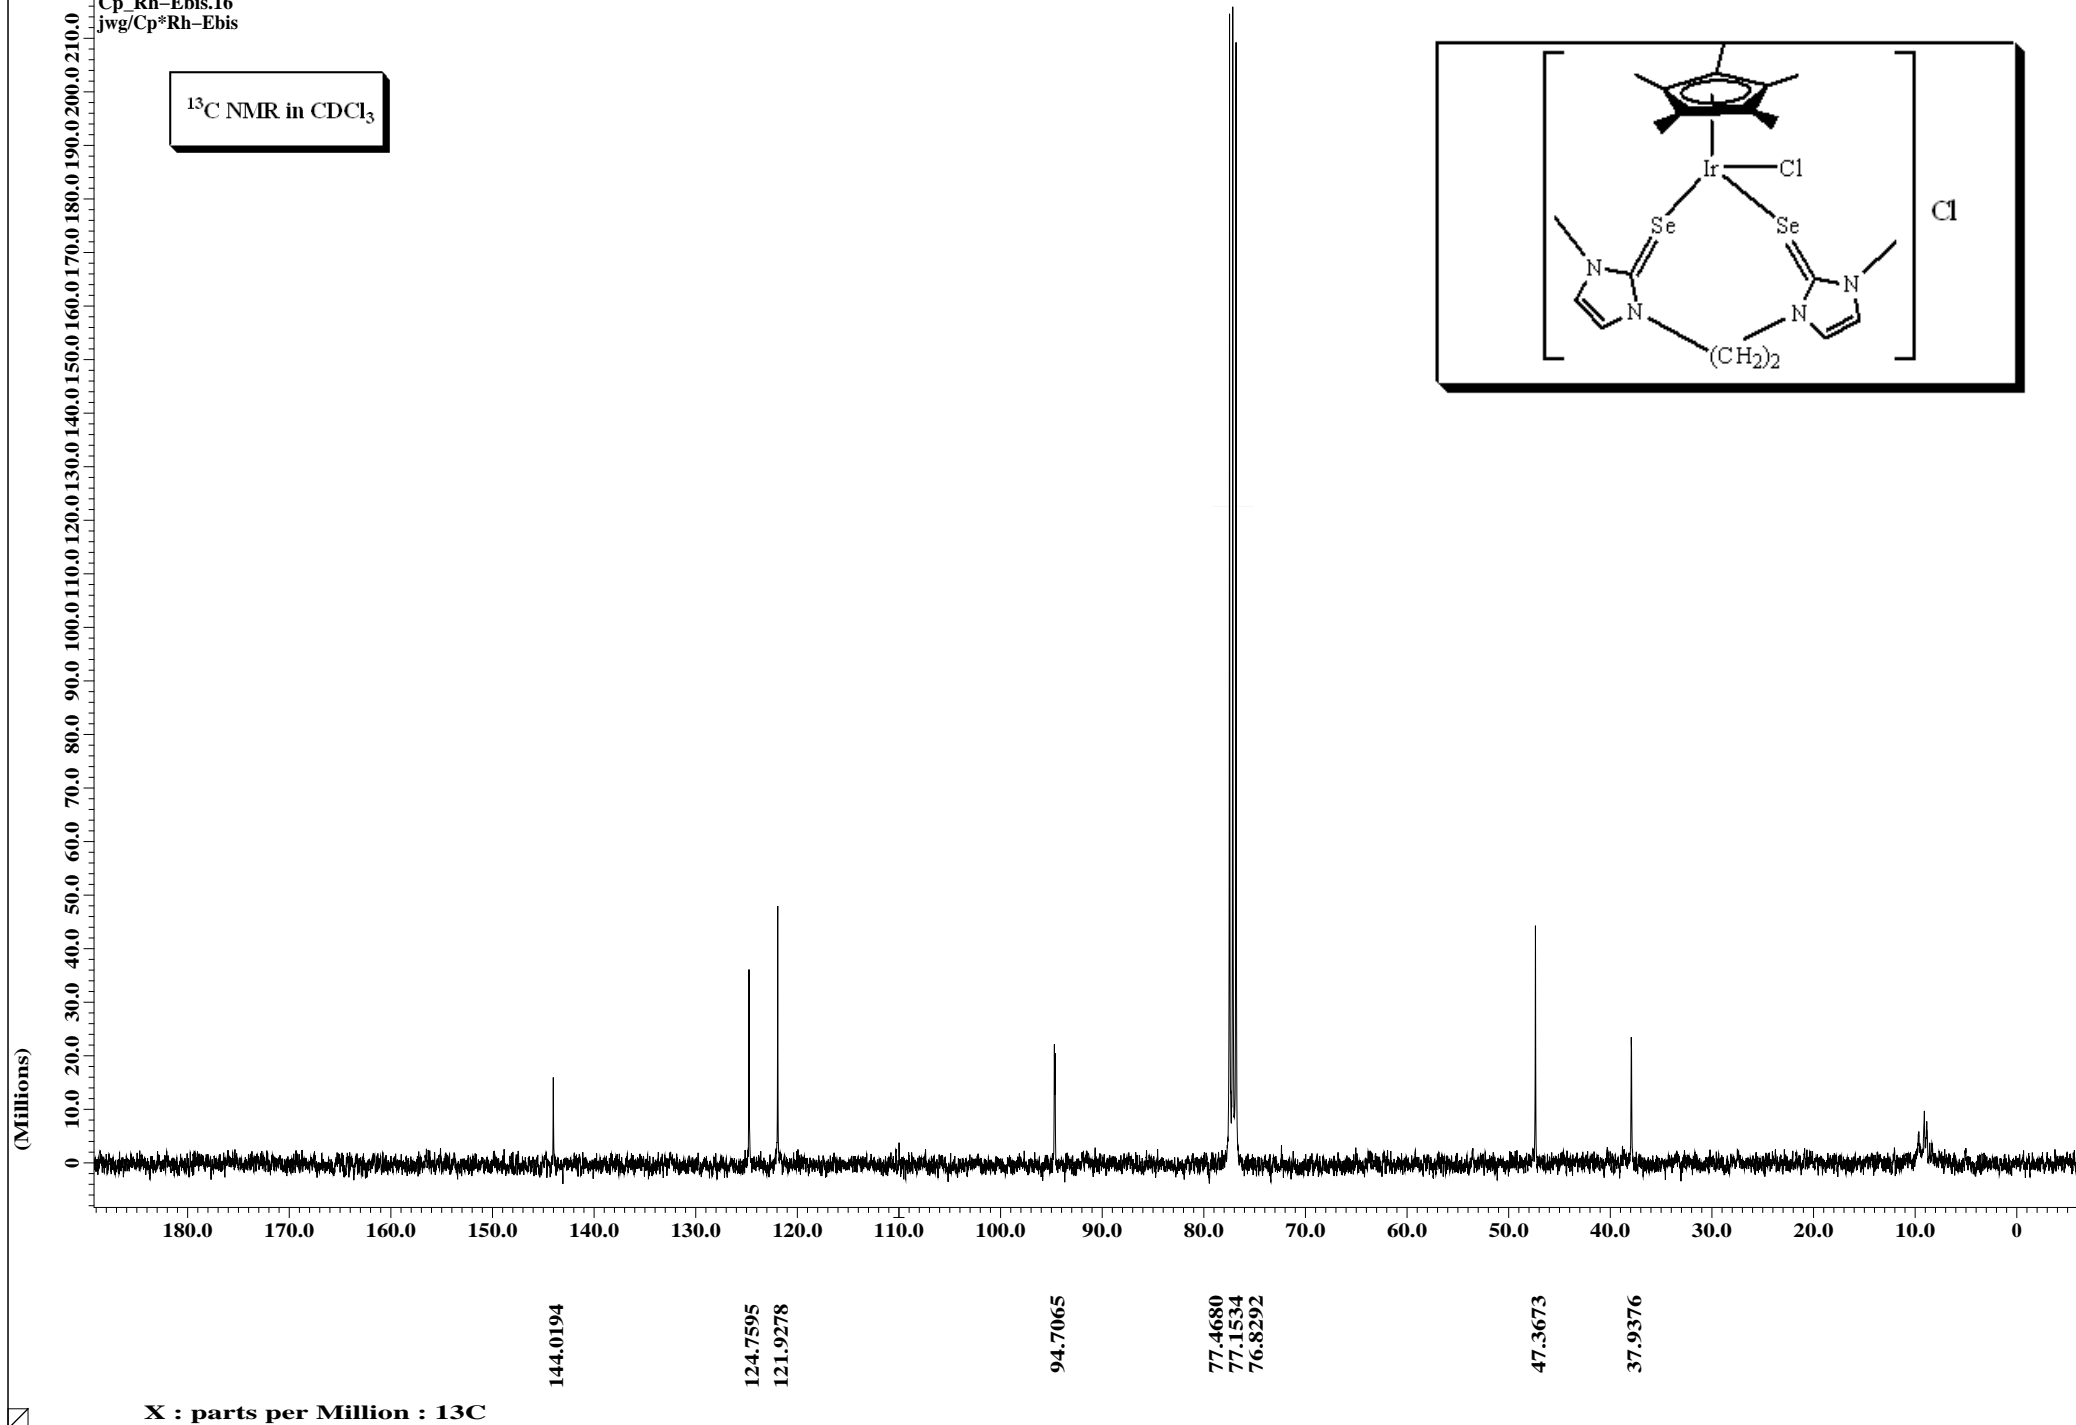



070518d.7  
jwg-1

$^1\text{H NMR}$  in  $\text{CDCl}_3$

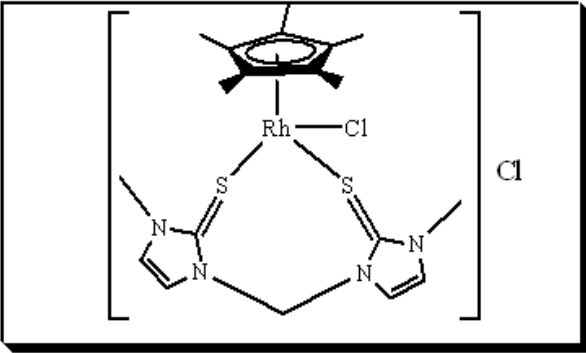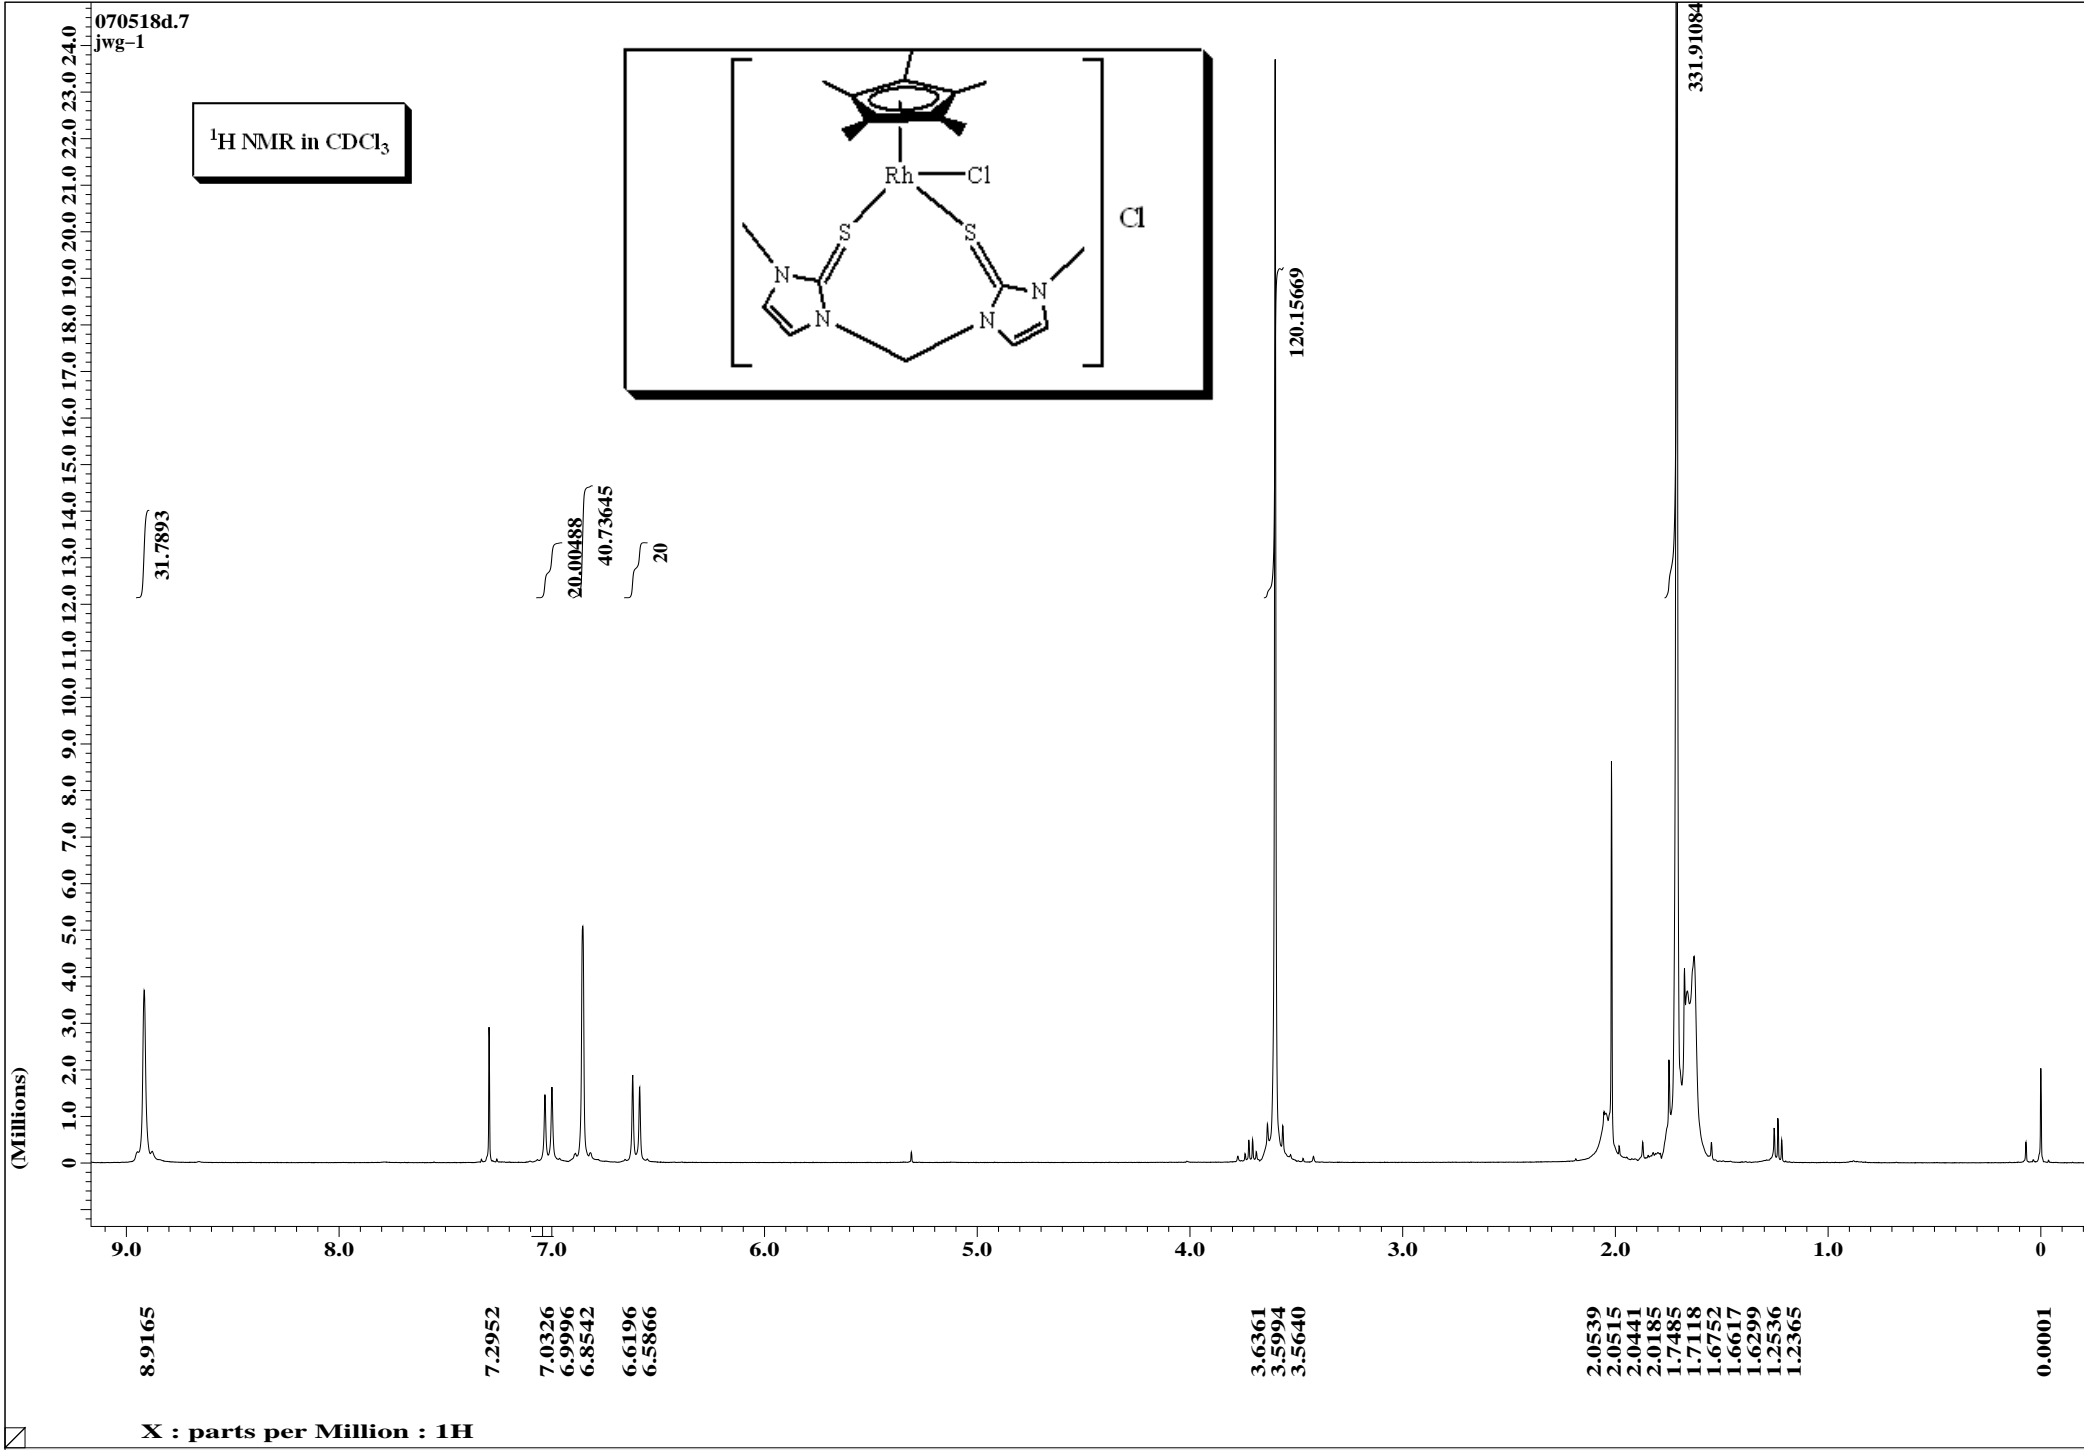

331.91084

X : parts per Million :  $^1\text{H}$

070518h\_copy.7  
jwg-1

$^{13}\text{C}$  NMR in  $\text{CDCl}_3$

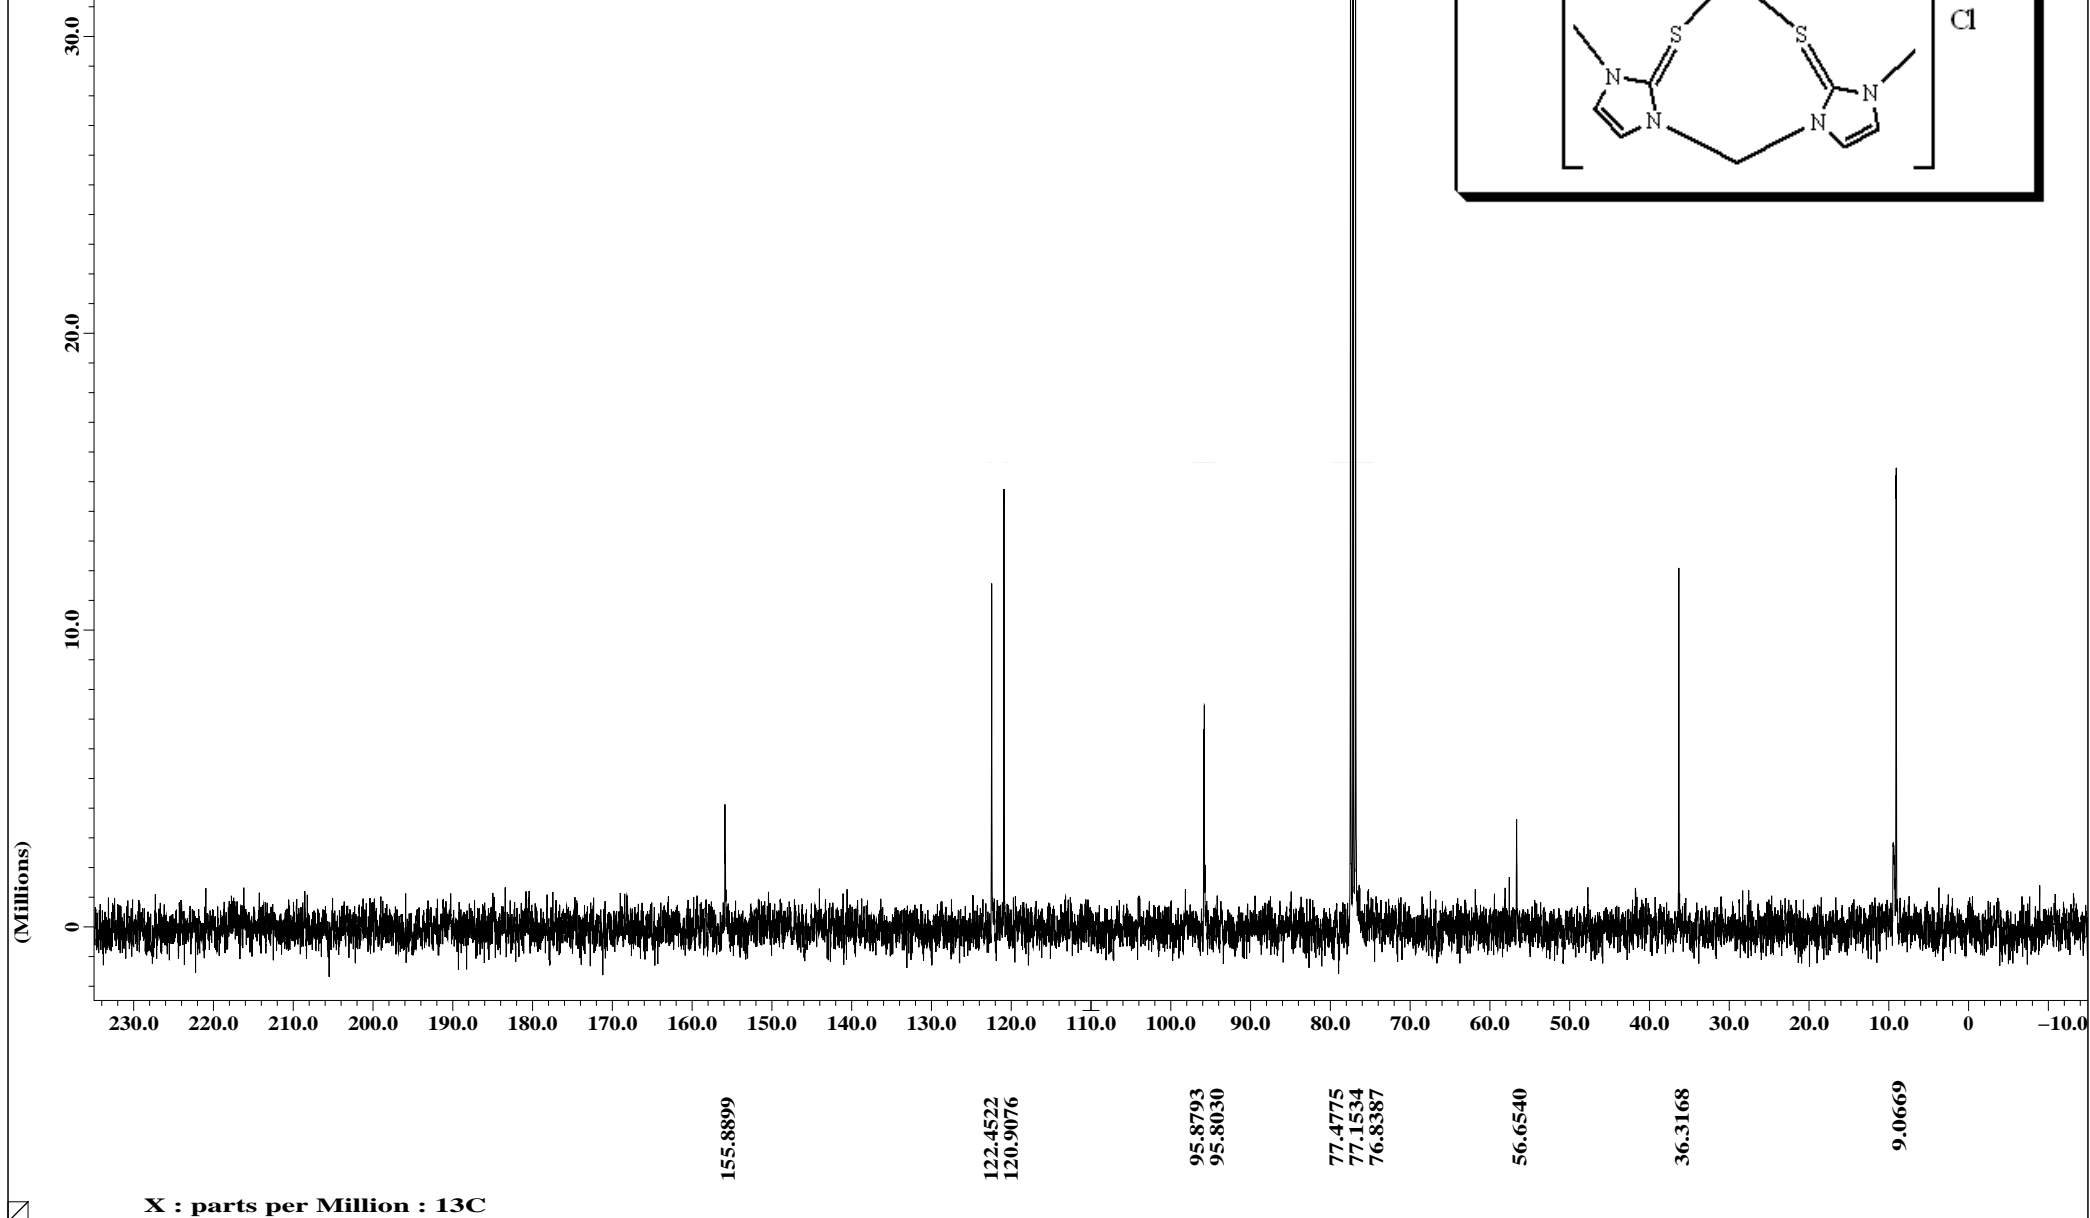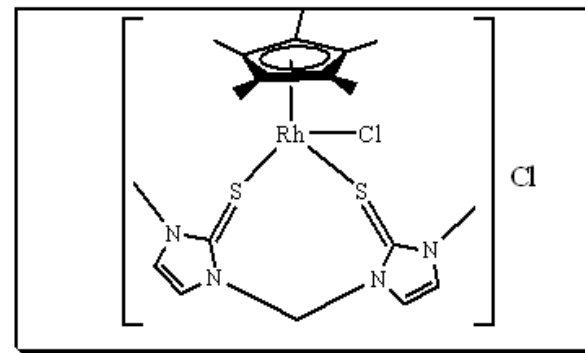

Cp<sub>2</sub>Rh-Mbis.12  
jwg/Cp<sup>+</sup>Rh-Mbis

<sup>1</sup>H NMR in CDCl<sub>3</sub>

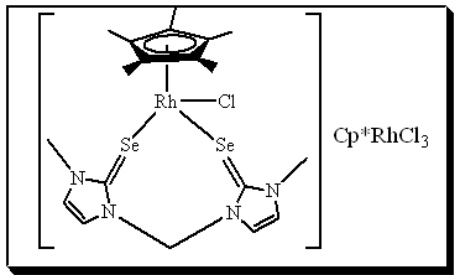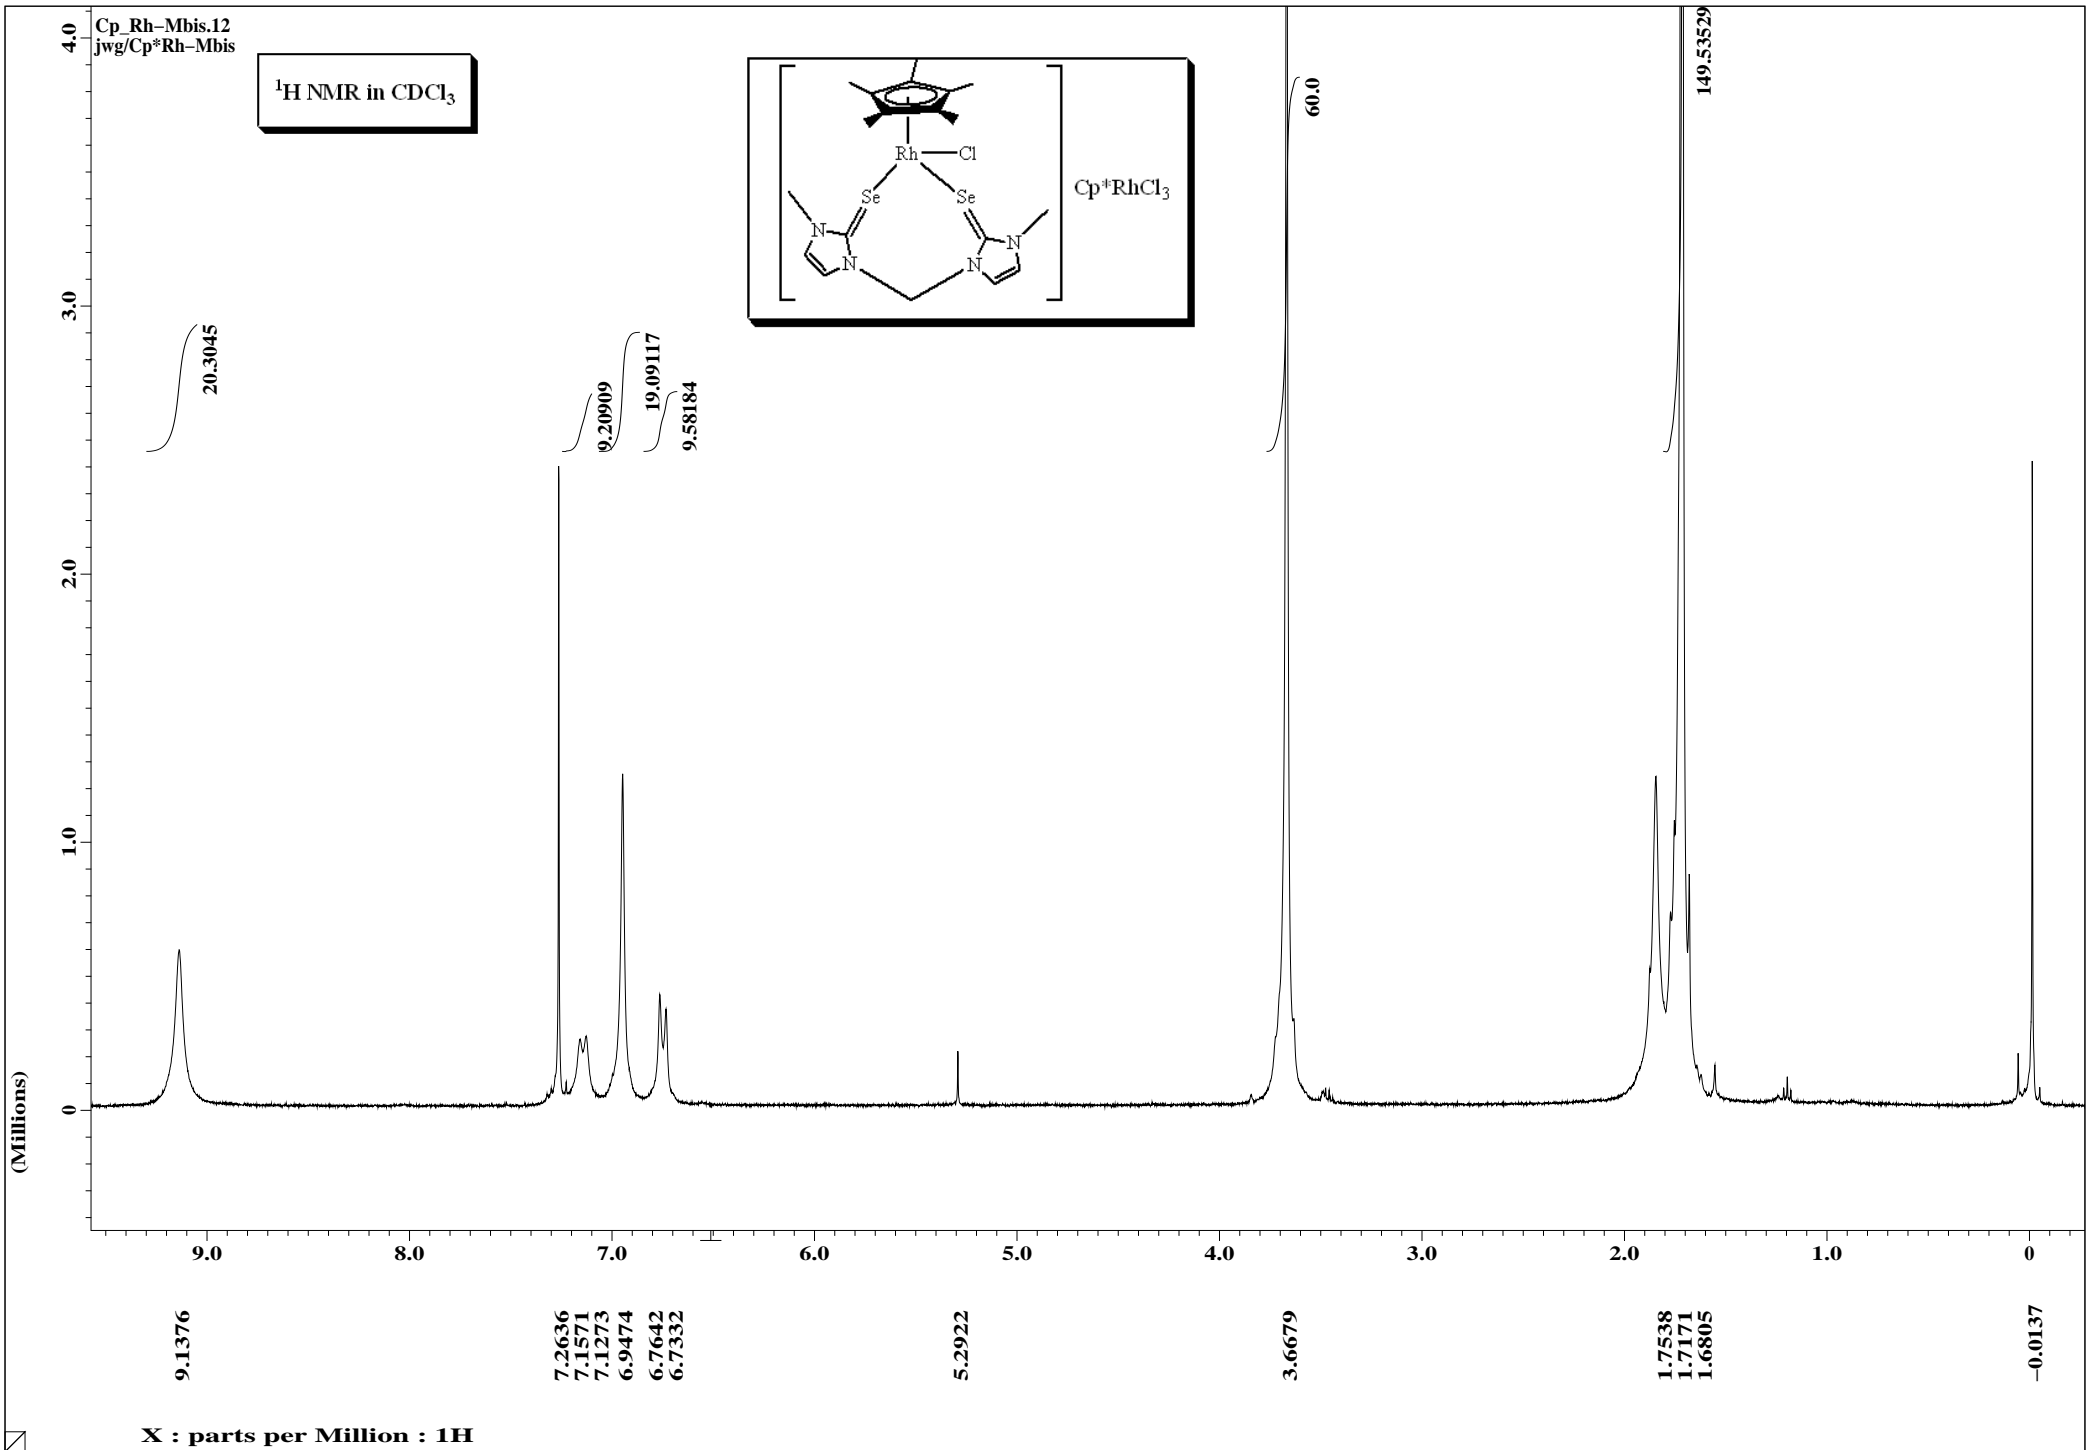

X : parts per Million : 1H

Cp\_Rh-Mbis.16  
jwg/Cp\*Rh-Mbis

$^{13}\text{C}$  NMR in  $\text{CDCl}_3$

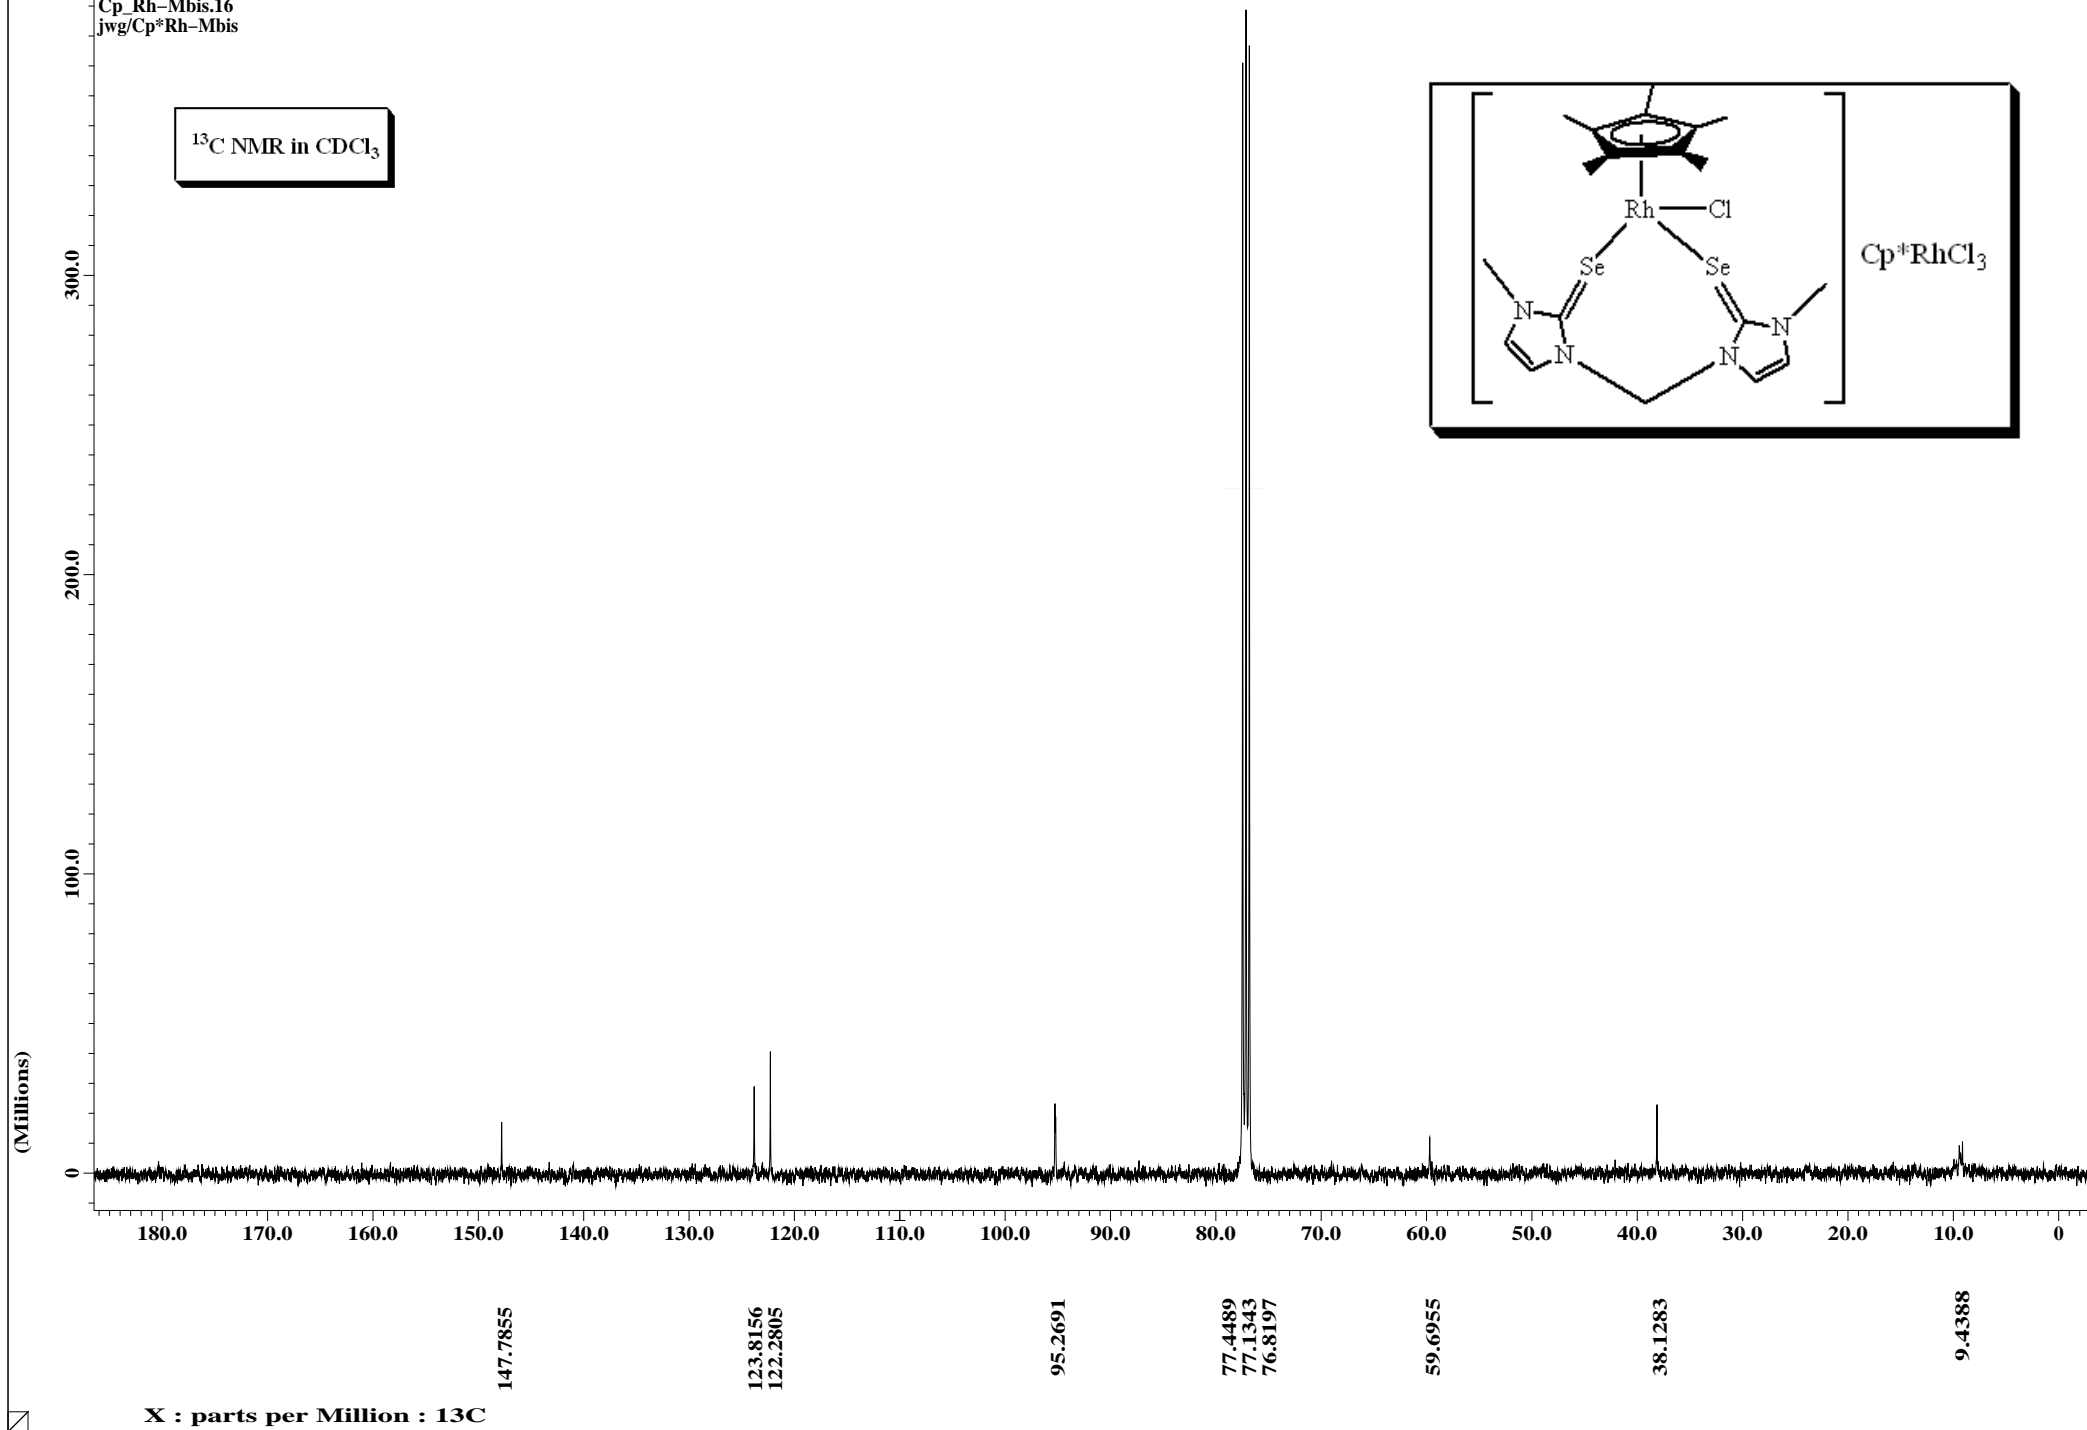

X : parts per Million :  $^{13}\text{C}$

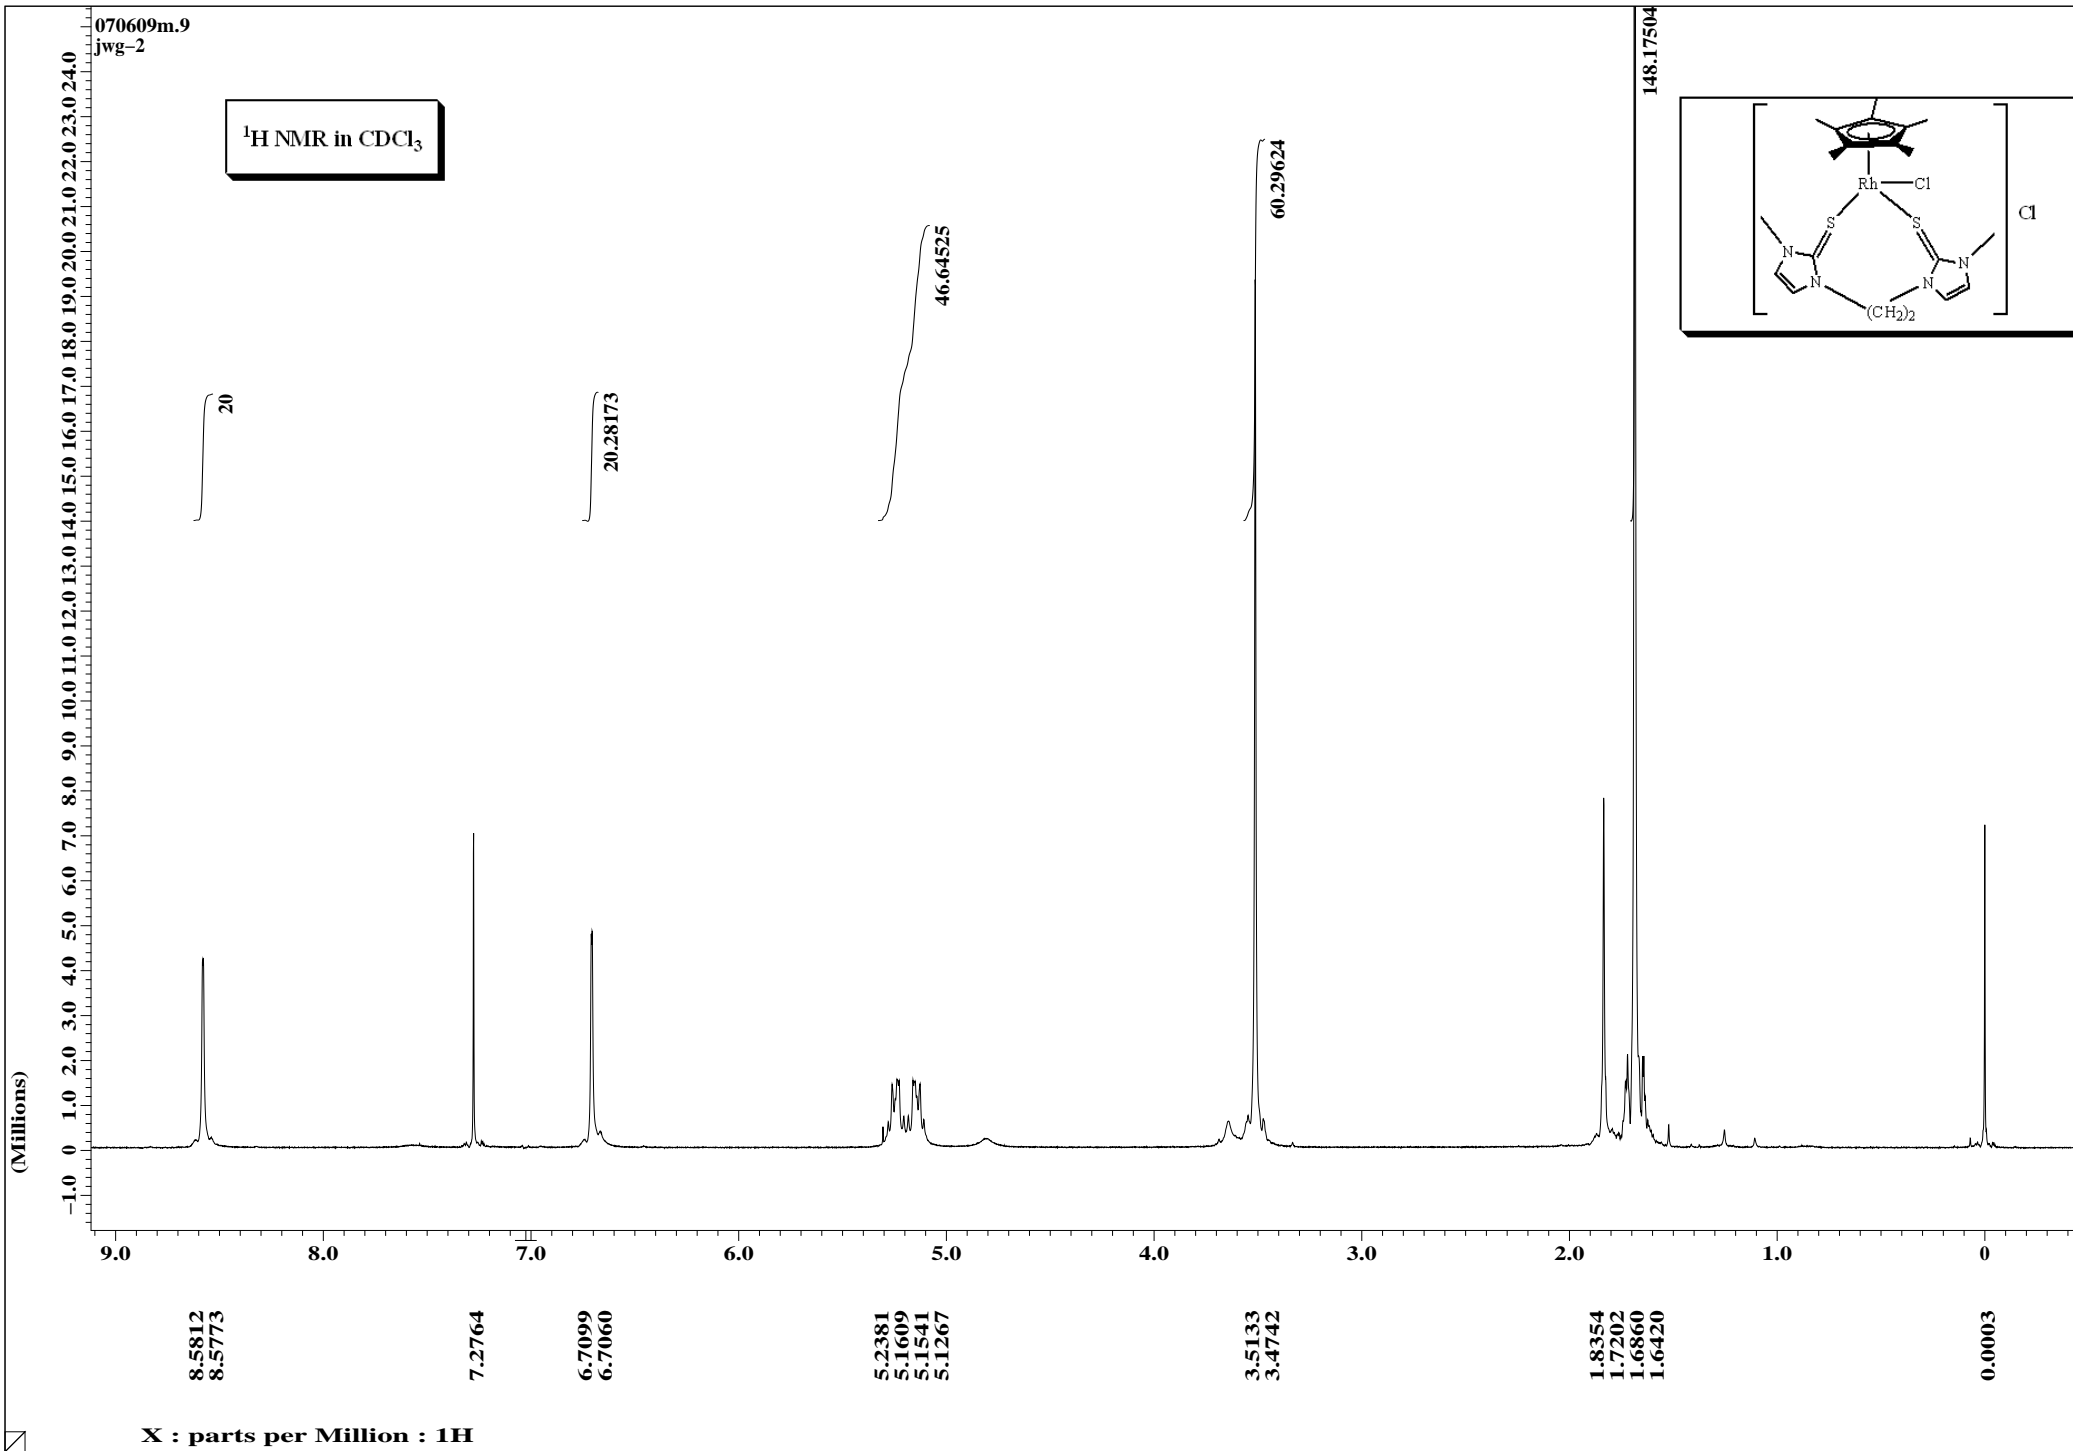

070609n.11  
jwg-2\_13C

$^{13}\text{C}$  NMR in  $\text{CDCl}_3$

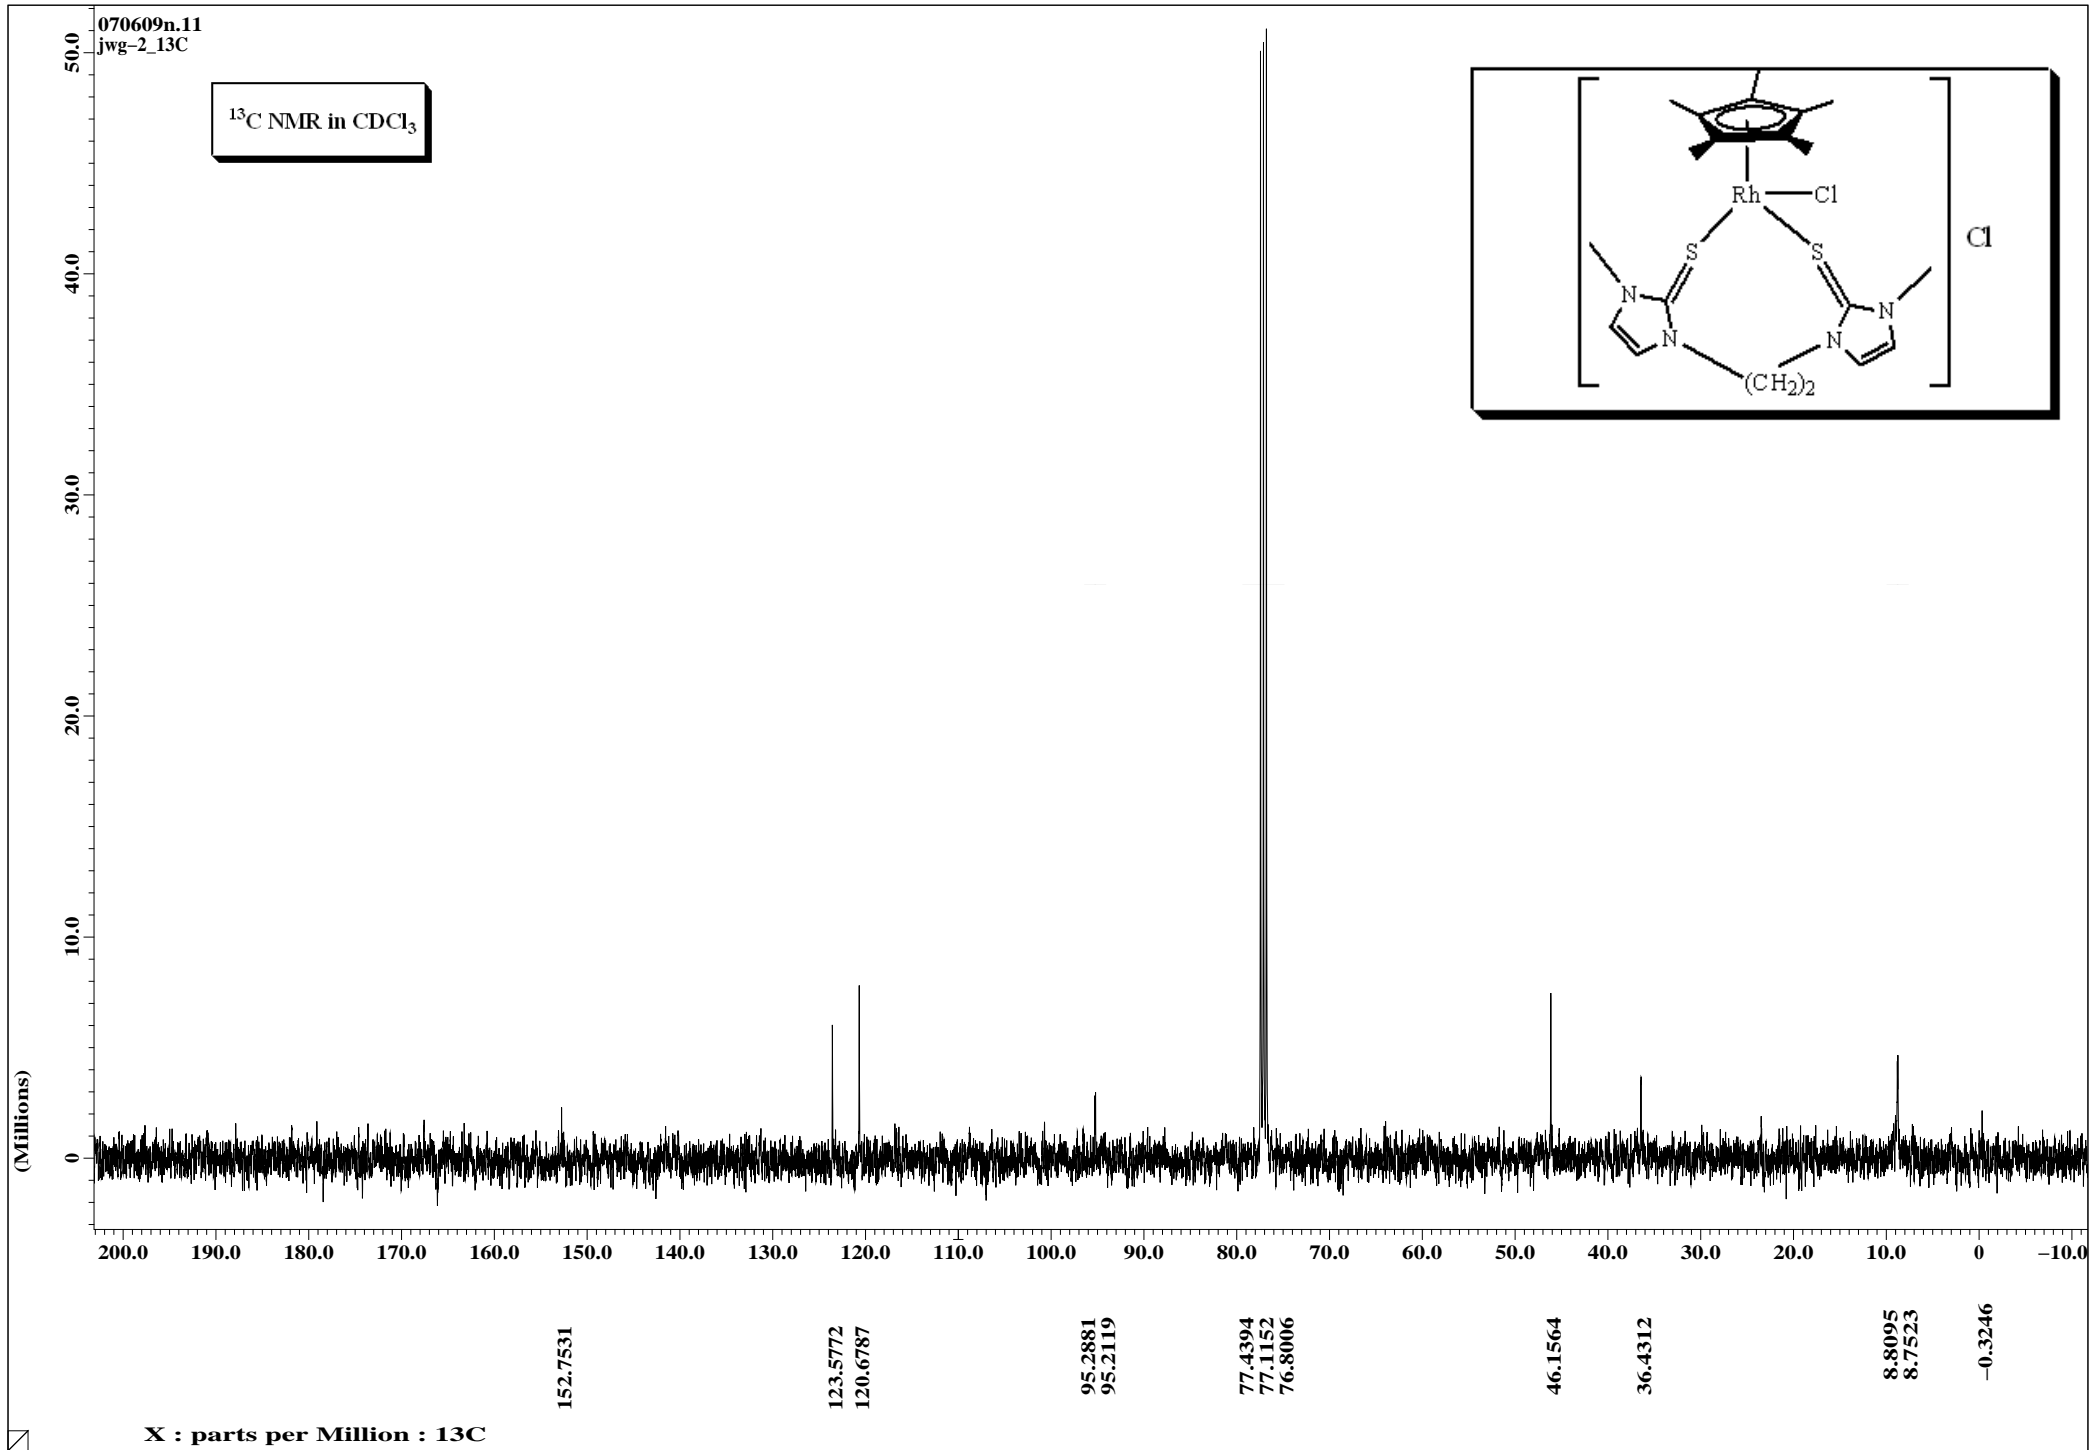

X : parts per Million :  $^{13}\text{C}$

Cp\_Rh-Ebis.12  
jwg/Cp\*<sup>+</sup>Rh-Ebis

<sup>1</sup>H NMR in CDCl<sub>3</sub>

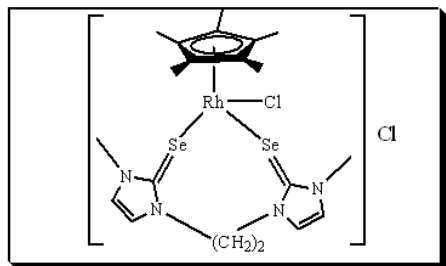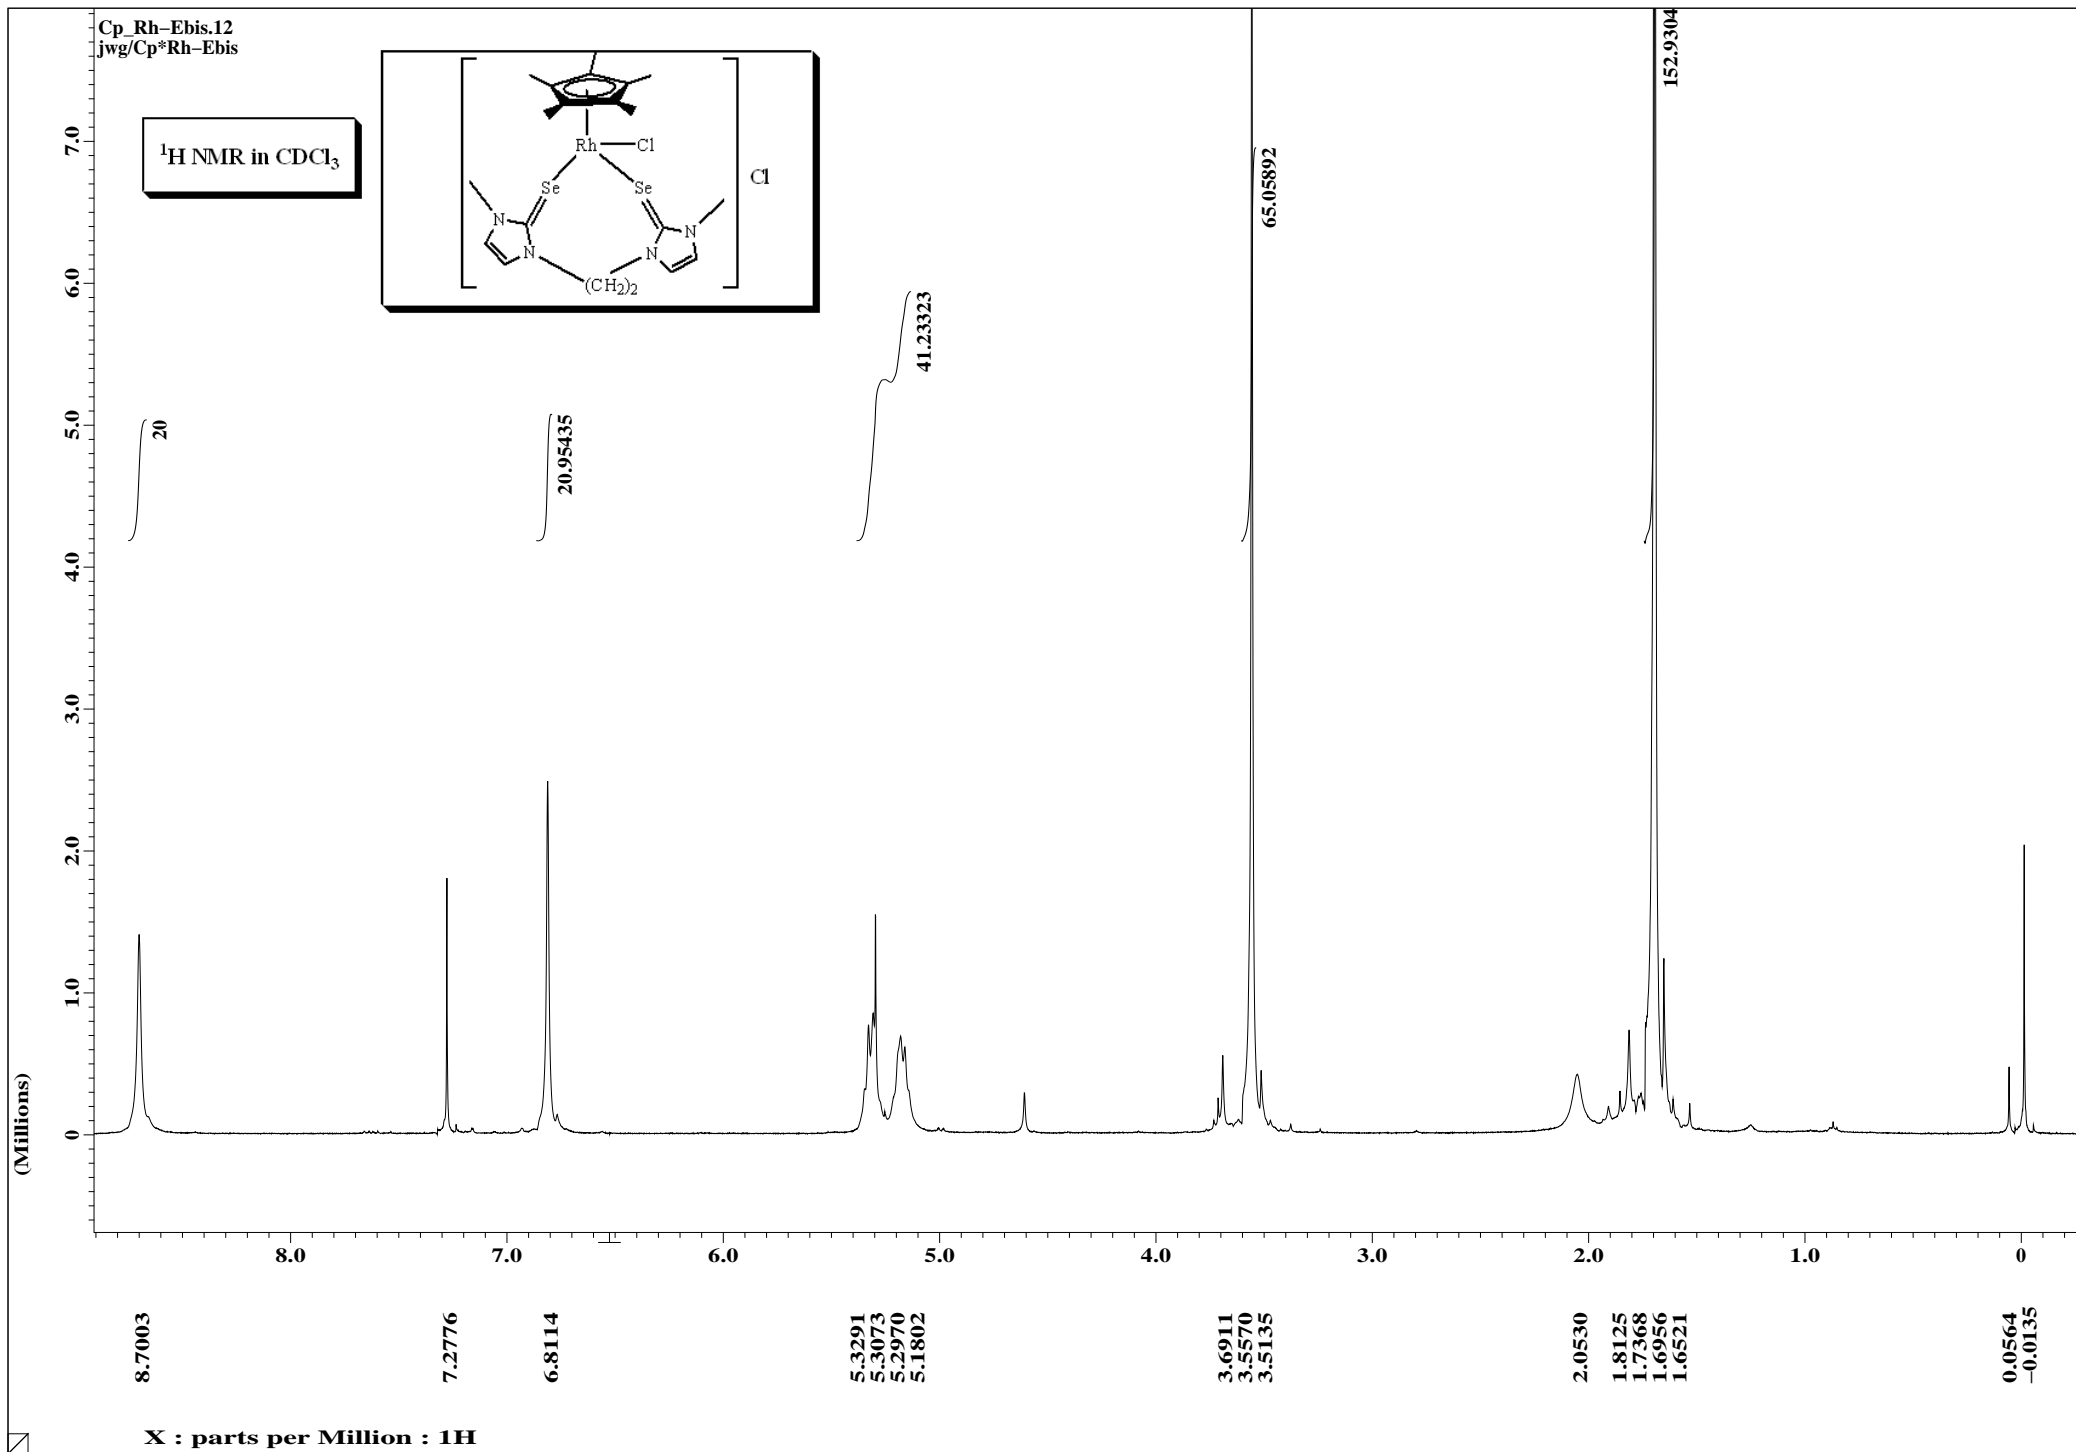

Cp\_Rh-Ebis.17  
jwg/Cp\*Rh-Ebis

$^{13}\text{C}$  NMR in  $\text{CDCl}_3$

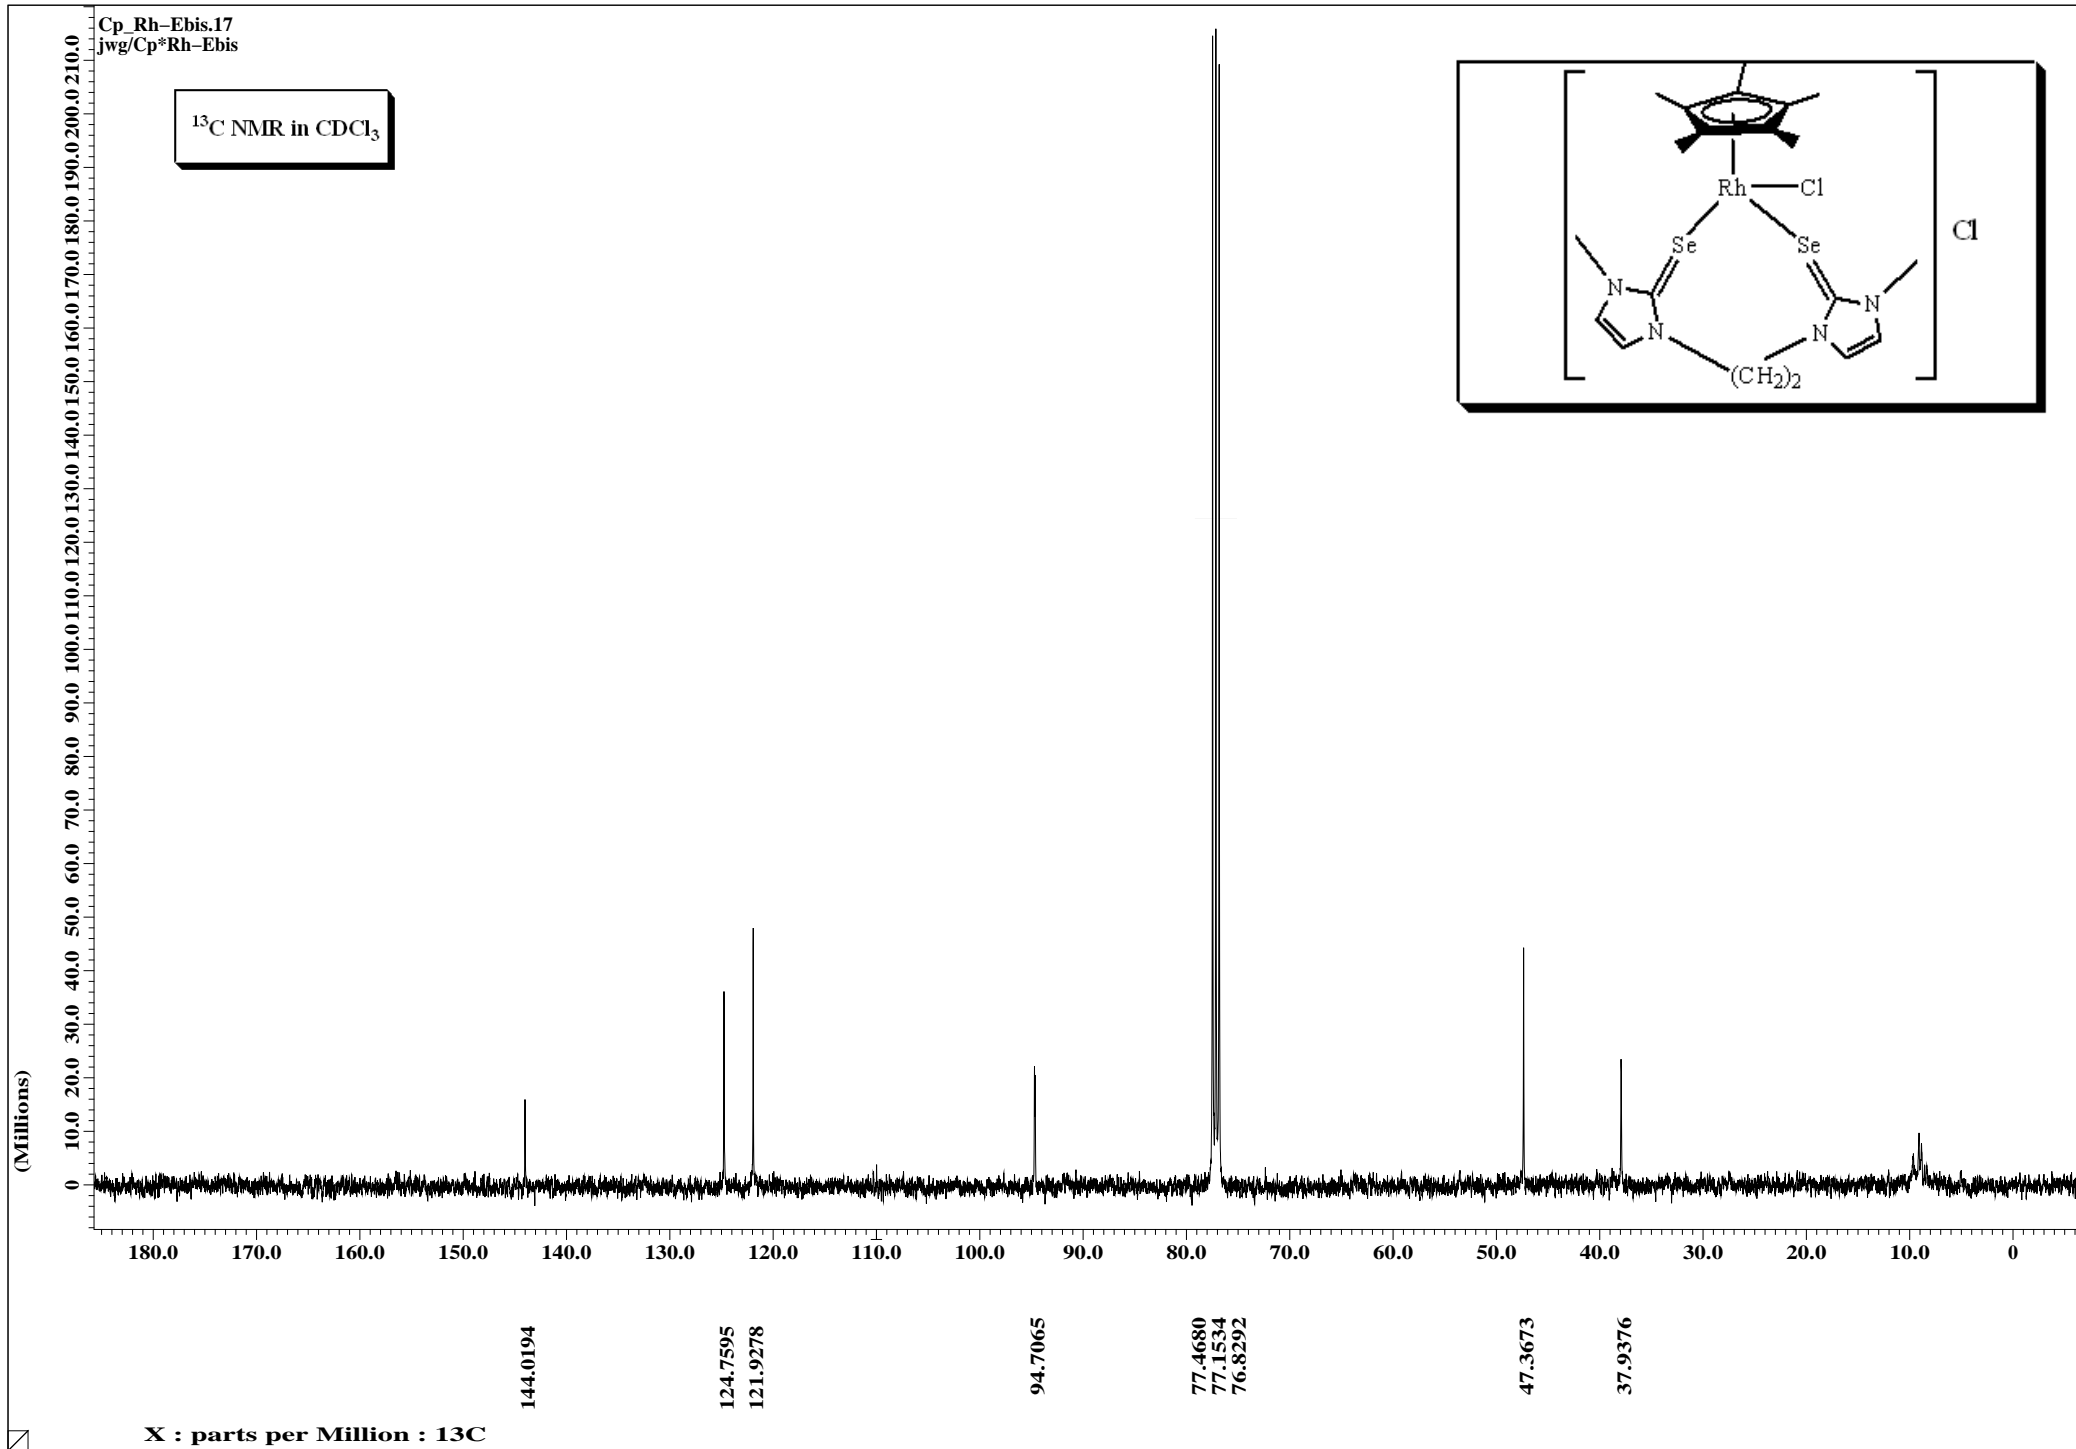



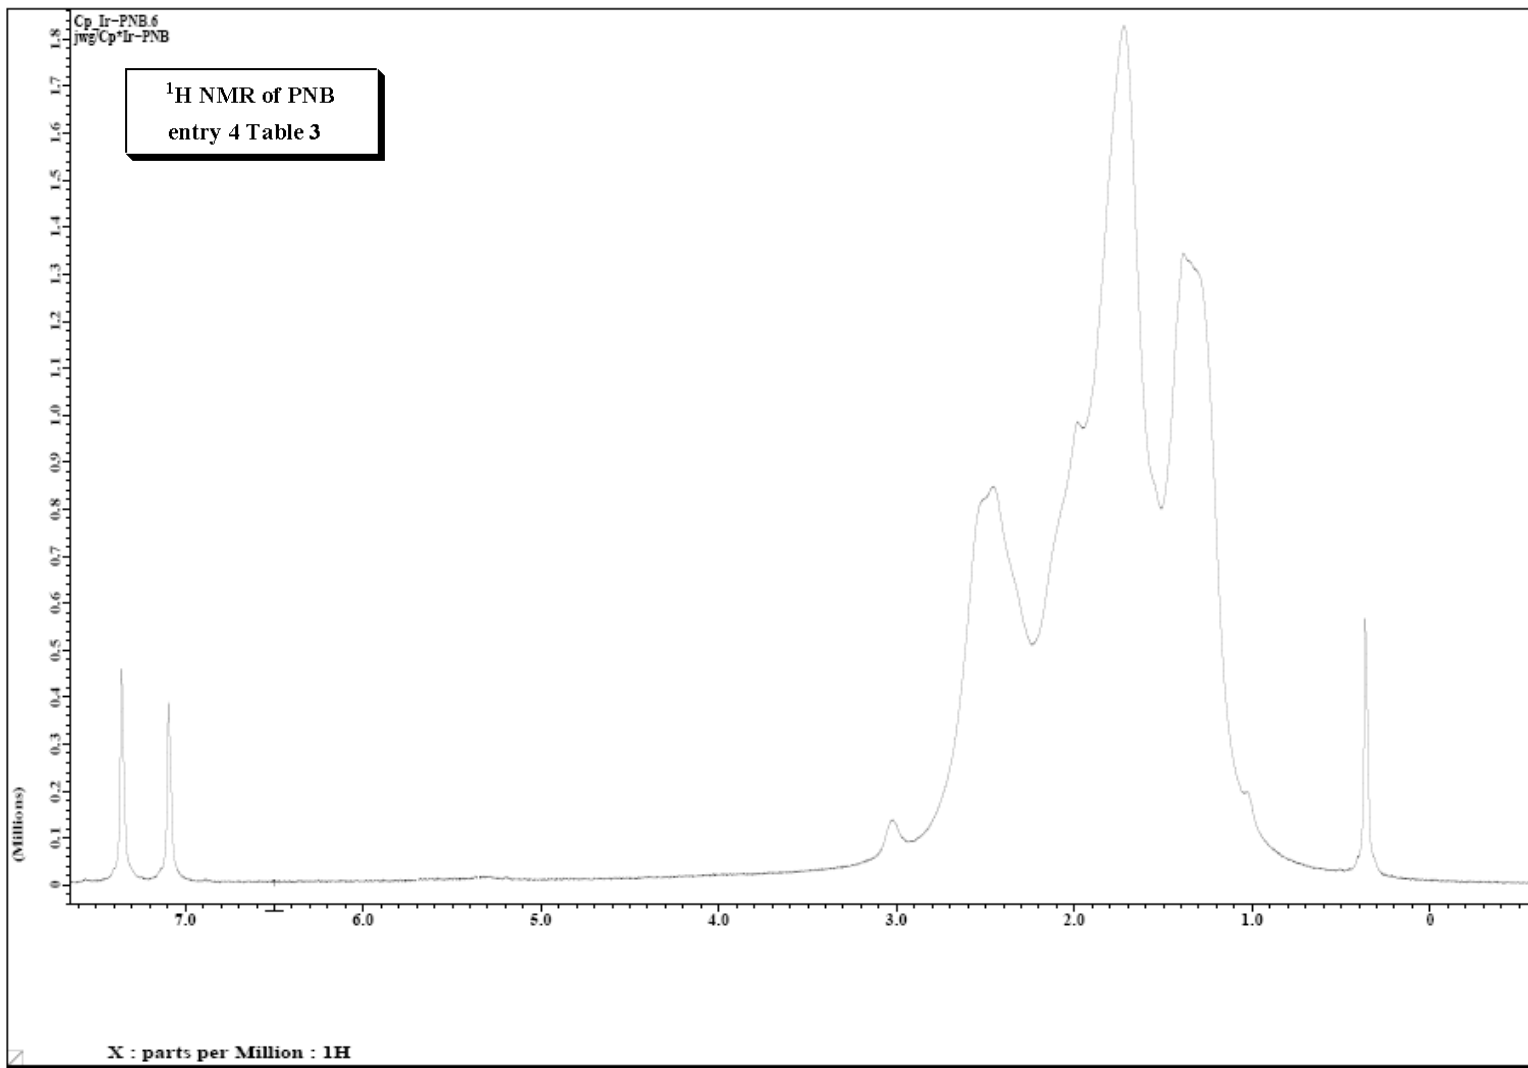

Cp\_Ir-PNB.28  
jwg/Cp\*Ir-PNB

**$^{13}\text{C}$  NMR of PNB  
entry 4 Table 3**

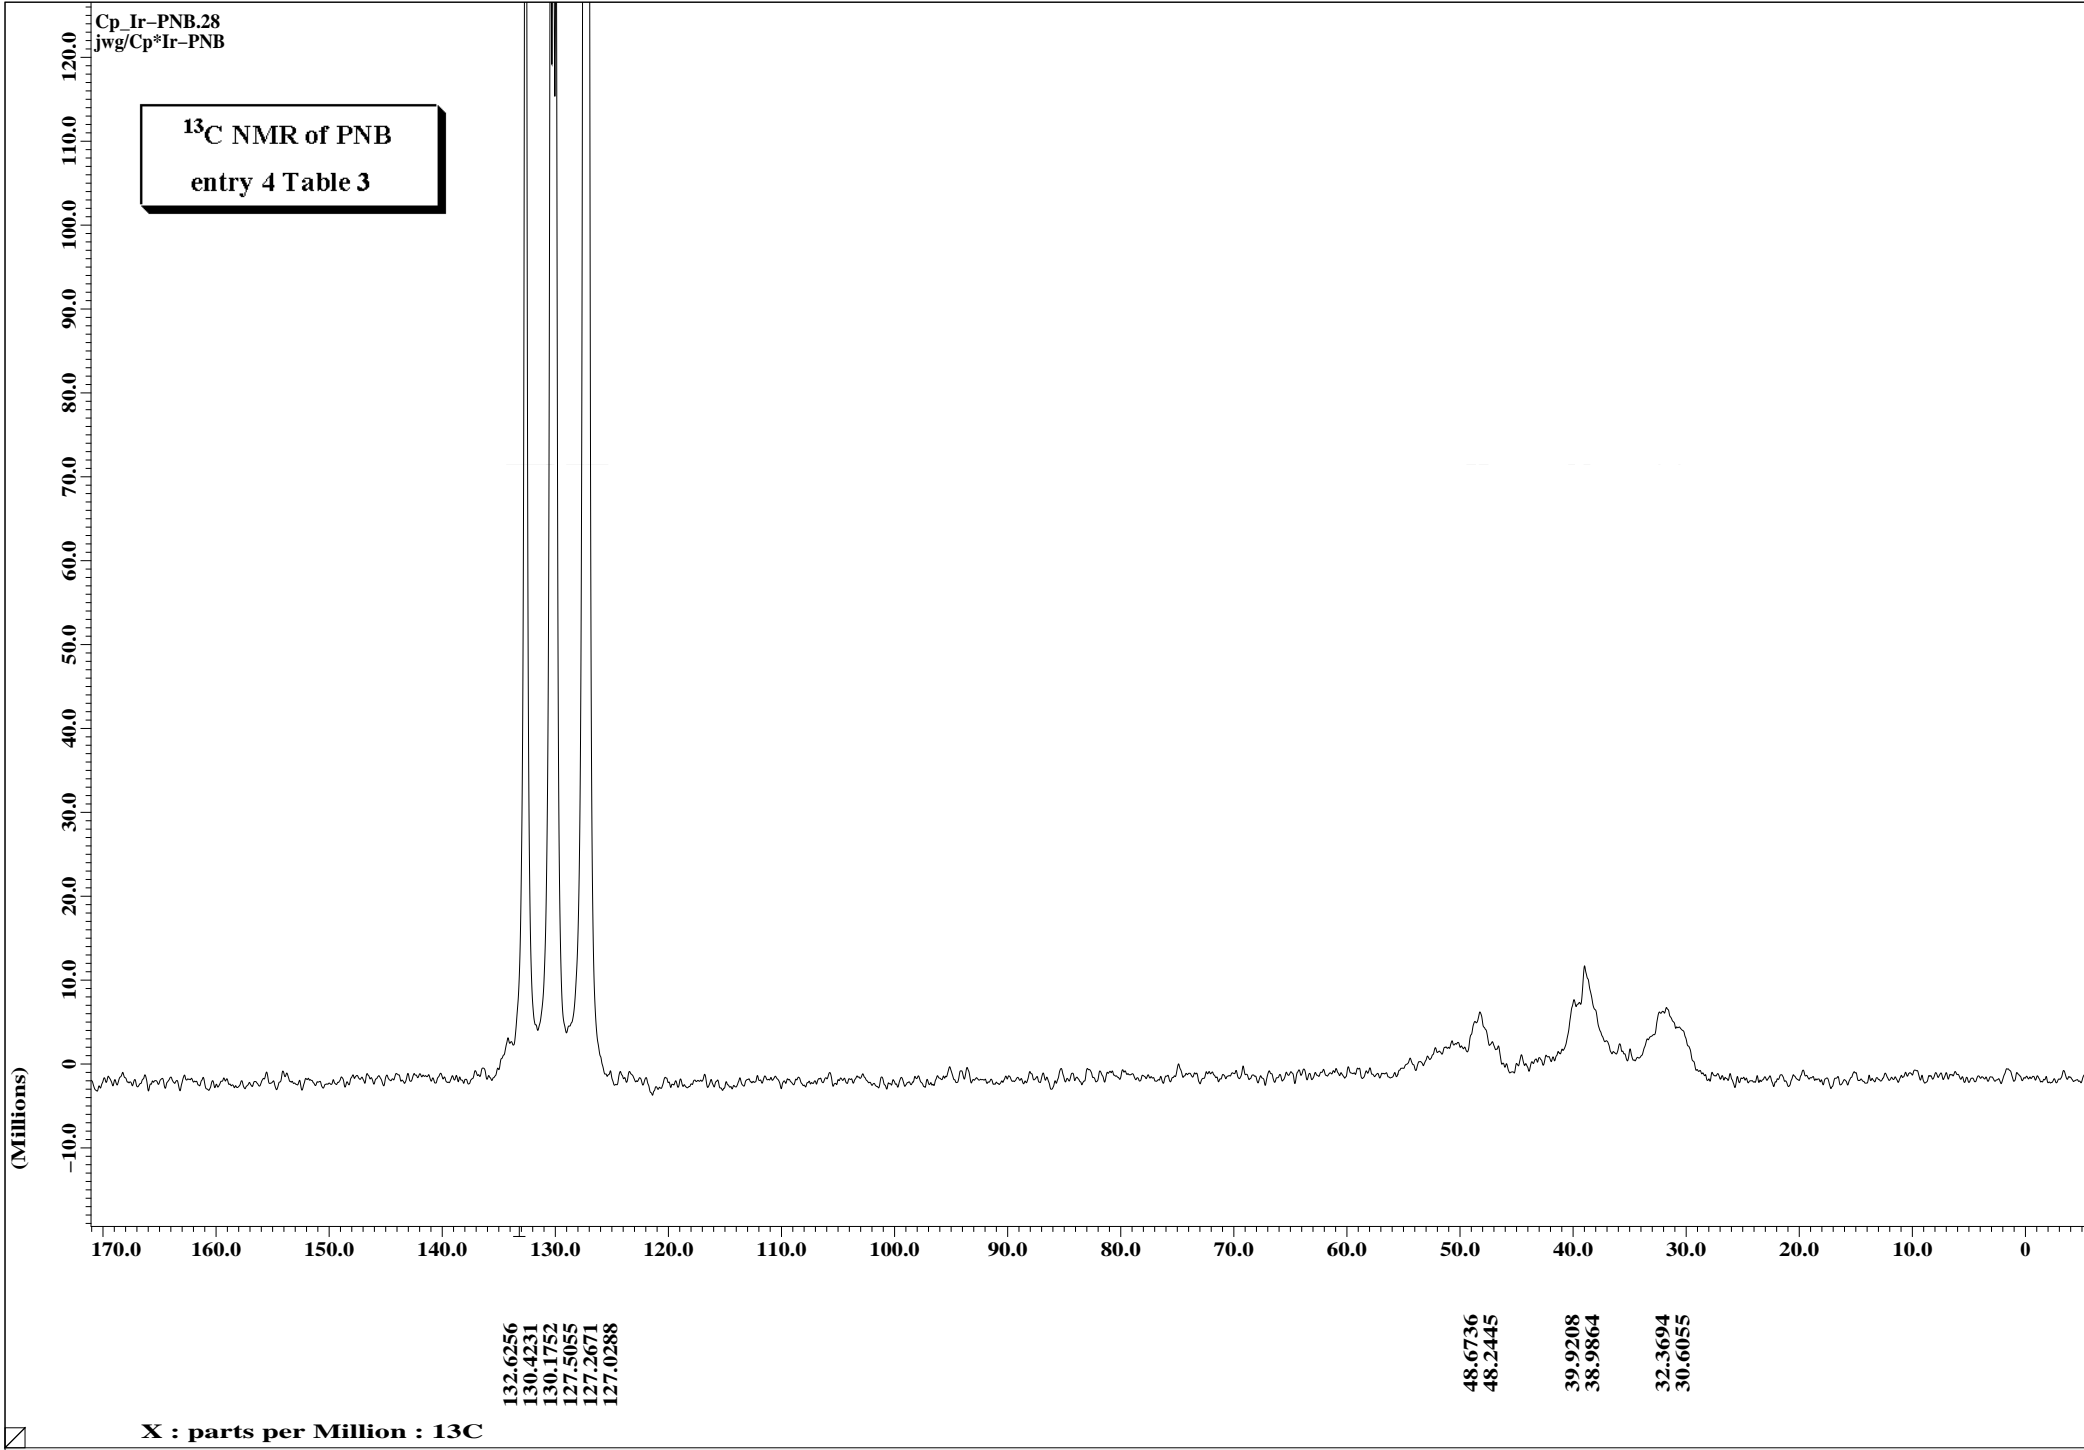

X : parts per Million :  $^{13}\text{C}$

Cp\_Ir-PNB.31  
jwg/Cp\*Ir-PNB

**$^{13}\text{C}$  NMR of PNB**  
**entry 4 Table 3**

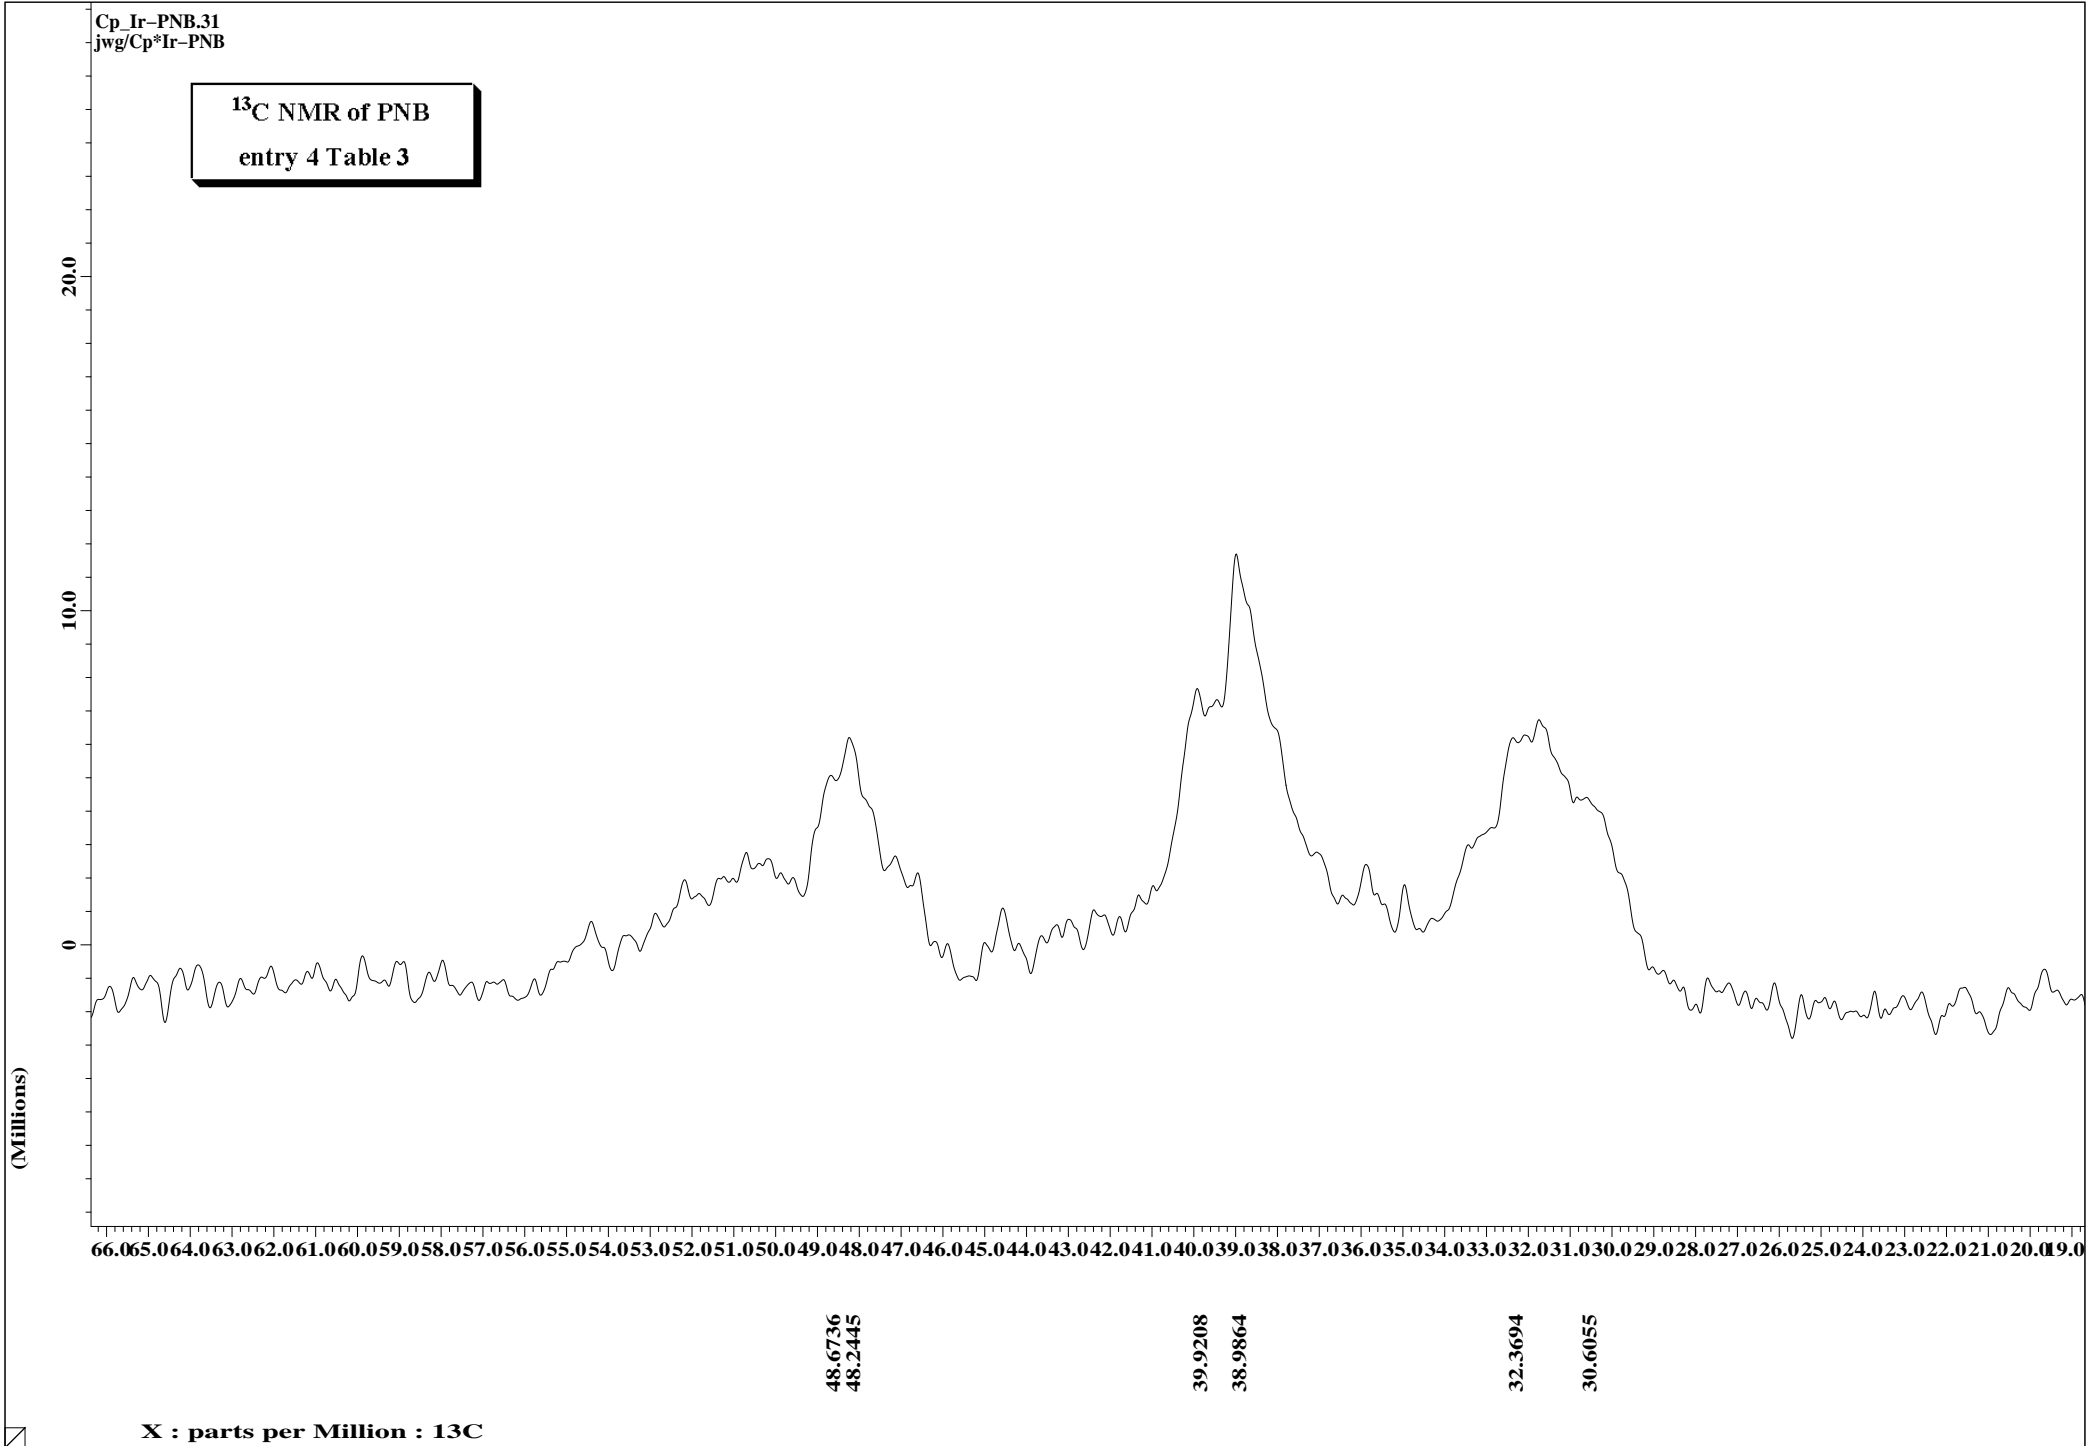

X : parts per Million :  $^{13}\text{C}$

**<sup>13</sup>C NMR of PNB**  
**entry 4 Table 3**

48.052  
47.927  
38.684  
36.066  
35.805  
31.785  
31.612

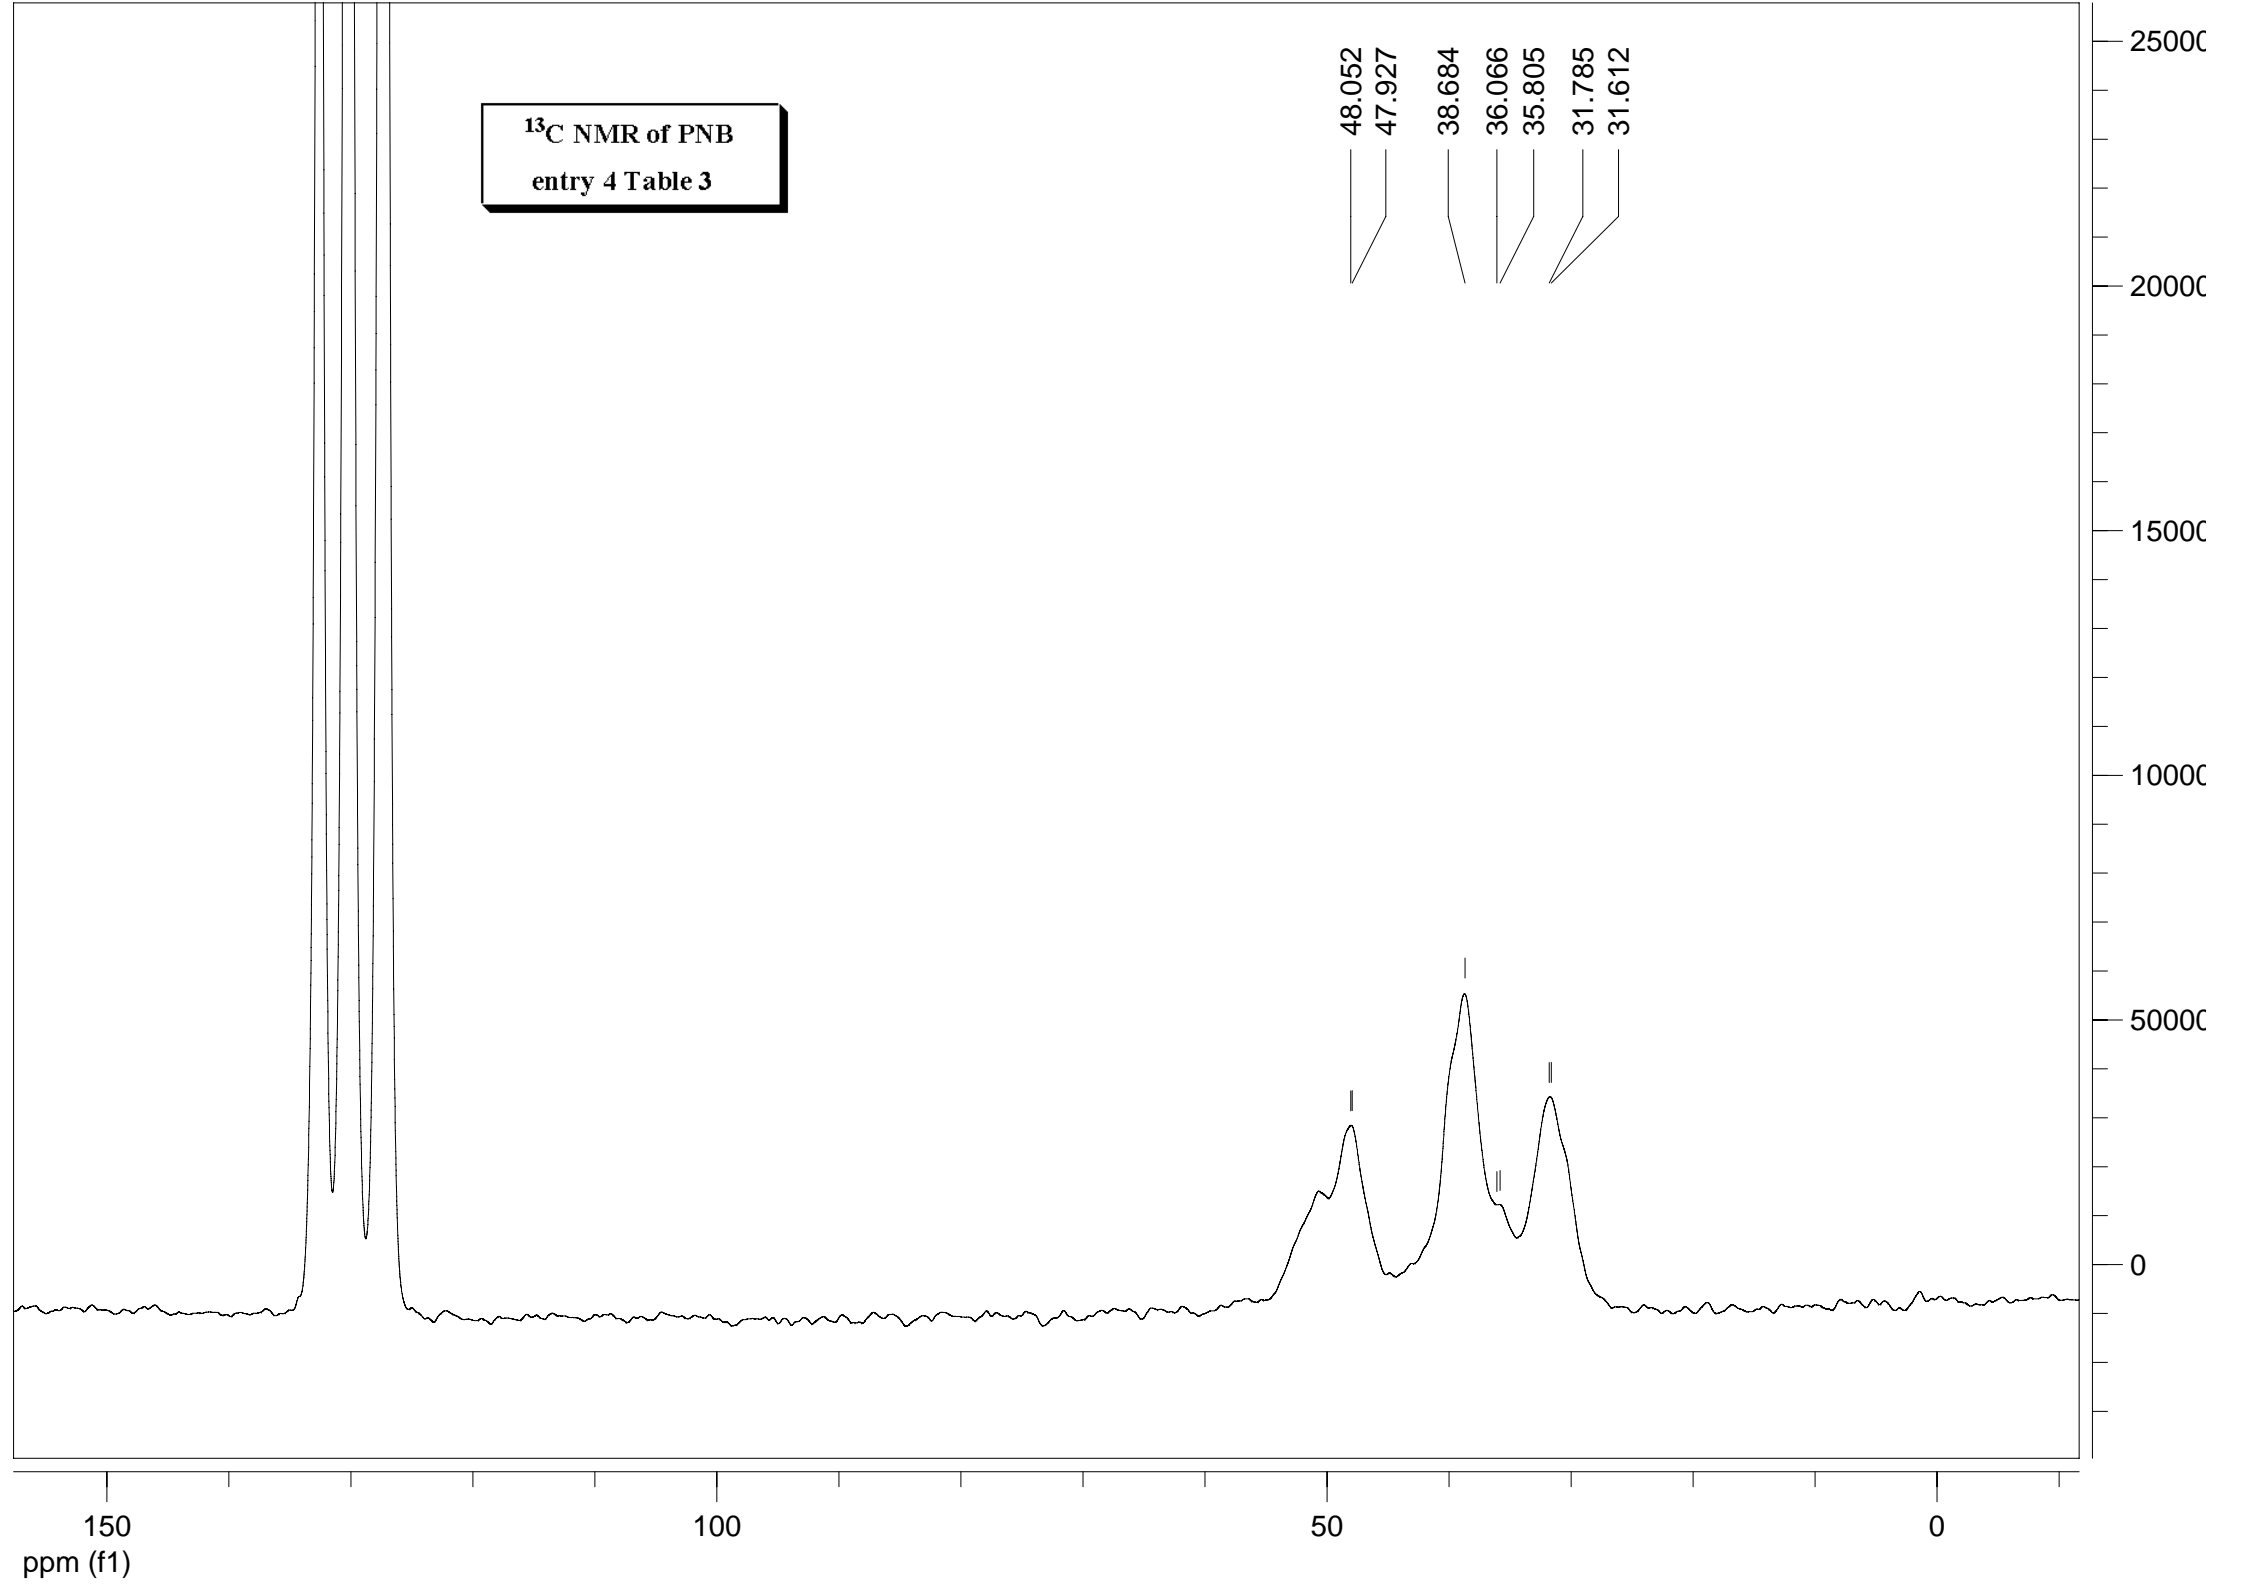

**<sup>13</sup>C NMR of PNB**  
**entry 4 Table 3**

50.695  
48.057  
47.902  
38.784  
38.658  
35.795  
35.607  
31.794  
31.593

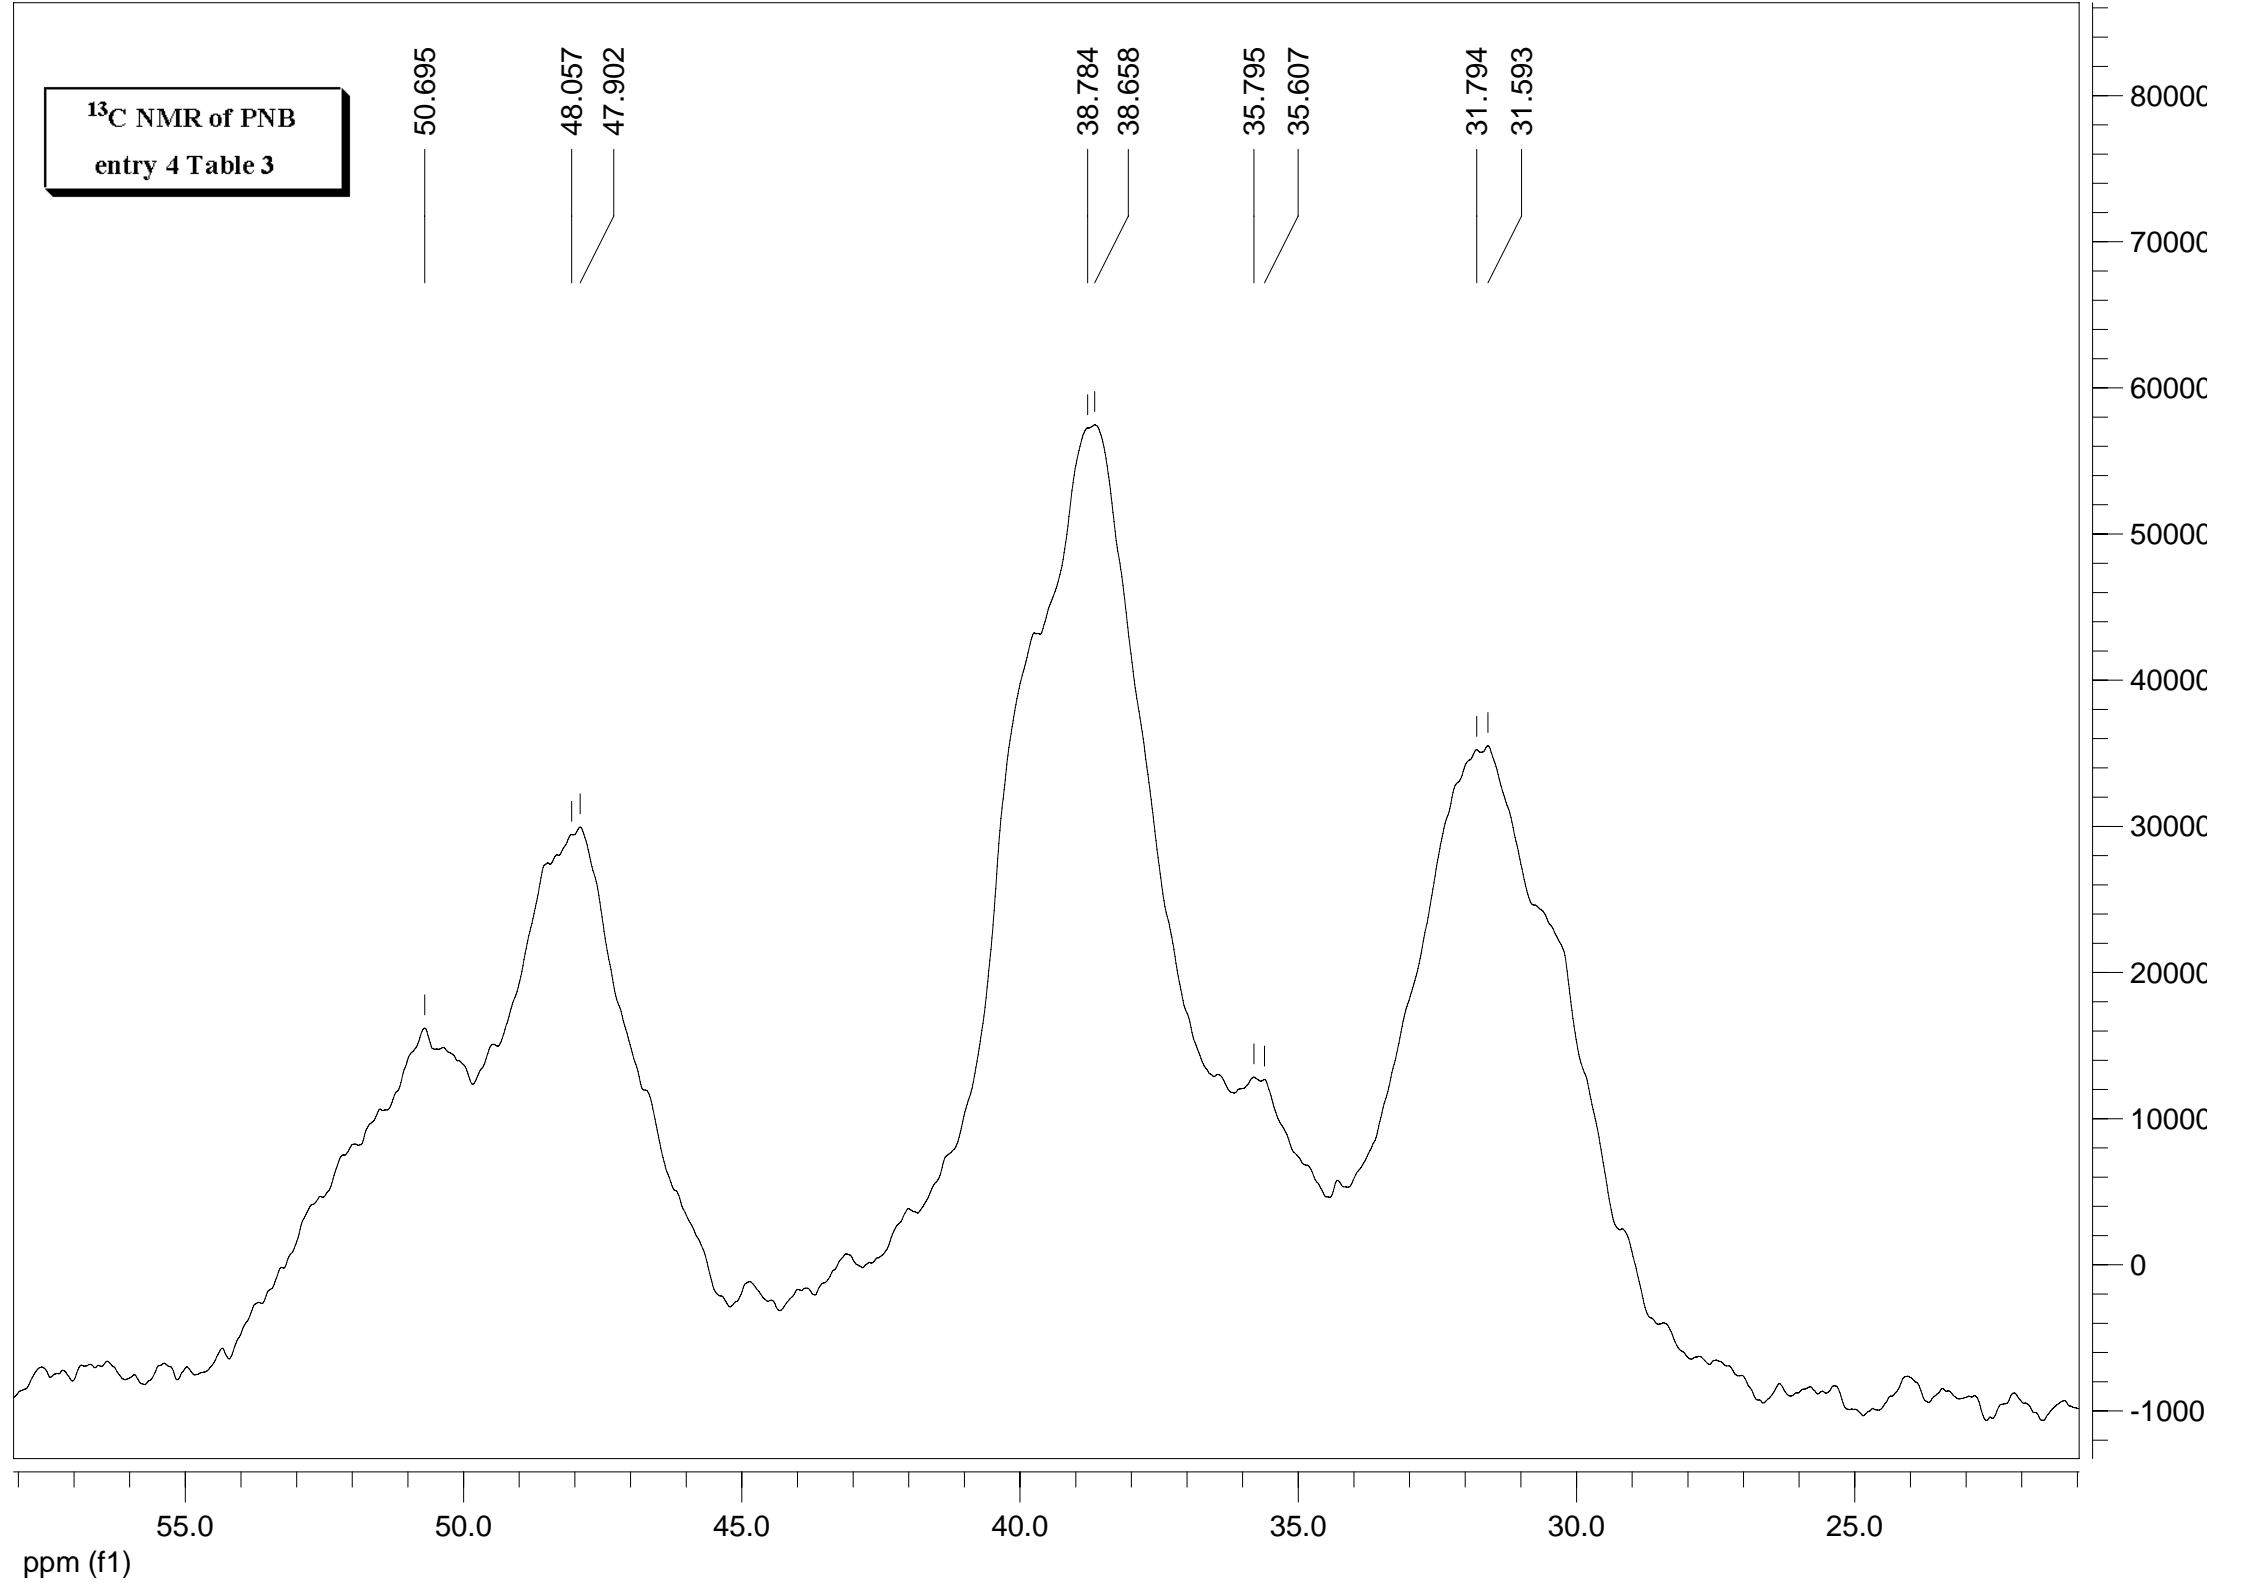

Supplement: b801862f.pdf [file b801862f.pdf]
